# Supplementary material for: Organocatalytic asymmetric synthesis of quaternary α-isoxazole–α-alkynyl amino acid derivatives
Source: Royal Society of Chemistry journal article supplement (doi:10.1039/d2ob01746f), 2022-01-01

## 1. General Information

Chemicals were purchased from commercial suppliers and used without further purification unless otherwise stated. Chiral phosphoric acids **CPA1-CPA10** and racemic phosphoric acid were purchased from commercial suppliers. Solvents were dried and purified according to the standard procedures before use. Reactions were monitored by TLC. Racemic products were obtained from corresponding substrates catalyzed by racemic phosphoric acid at room temperature. Flash column chromatography was performed on silica gels (200-300 mesh). <sup>1</sup>H NMR and <sup>13</sup>C NMR (300 or 400 and 75 or 100 MHz, respectively) spectra were recorded on a Bruker 300 or 400 MHz NMR spectrometer in CDCl<sub>3</sub> or DMSO-d<sub>6</sub>. <sup>1</sup>H NMR chemical shifts are reported in ppm (δ) relative to tetramethylsilane (TMS) with the solvent resonance employed as the internal standard (CDCl<sub>3</sub>, δ 7.26 ppm, DMSO-d<sub>6</sub>, δ 2.50 ppm). Data are reported as follows: chemical shift, multiplicity (s = singlet, brs = broad singlet, d = doublet, t = triplet, dd = doublet of doublets, td = triplet of doublets, dt = doublet of triplets, q = quartet, m = multiplet), coupling constants (Hz) and integration. <sup>13</sup>C NMR chemical shifts are reported in ppm from tetramethylsilane (TMS) with the solvent resonances as the internal standard (CDCl<sub>3</sub>, δ 77.16 ppm, DMSO-d<sub>6</sub>, δ 39.52 ppm). All enantiomeric ratios were controlled by co-injections of the pure sample with the racemates. HRMS data were obtained on a Bruker Daltonics. Inc. mass instrument (ESI). Chiralpak IC-H, OD-H, AD-H, AY-H column was purchased from Daicel Chemical Industries (Hong Kong, China). Optical rotations were measured on a Perkin-Elmer 241 Polarimeter. Melting points were recorded on a Buchi Melting Point B-545.

## 2. Procedures and characterizations data of compounds

### 2.1 General produce of 5-aminoisoxazoles 1a-r

5-Aminoisoxazoles **1a-1r** were synthesized according to the procedures reported by our group.<sup>[1,2]</sup>

### 2.2 Synthesis of $\beta,\gamma$ -alkynyl- $\alpha$ -imino esters **2a-n**

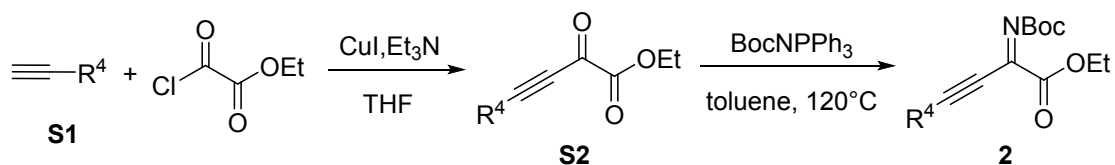

$\beta,\gamma$ -Alkynyl- $\alpha$ -imino esters **2** were prepared based on the reported procedures.<sup>[3]</sup>

A two necked flask was charged with  $\text{CuI}$  (10 mol%) and THF (0.4 M), trimethylamine (2.0 equiv), alkyne **S1** (1.0 equiv) and ethyl 2-chloro-2-oxoacetate (1.2 equiv.) were added sequentially and the resulting mixture was stirred at room temperature for 2 days. The reaction was quenched by saturated aqueous  $\text{NaHCO}_3$  solution and the aqueous phase was extracted with ethyl acetate. The organic phases were combined, dried over  $\text{Na}_2\text{SO}_4$  and concentrated under vacuum. The residue was purified by silica gel chromatography (petroleum ether/ethyl acetate 20:1) to give the product **S2**. Afterwards, an oven-dried round bottom was added ketoesters **S2** (1.0 equiv),  $\text{N-Boc-triphenyliminophosphorane}$  (1.2 equiv.) and toluene. The mixture was heated to  $120^\circ\text{C}$  and stirred for 24h. After cooling to room temperature, the mixture was concentrated under vacuum. The residue was purified by silica gel chromatography (petroleum ether/ ethyl acetate 20:1) to give the product **2**.

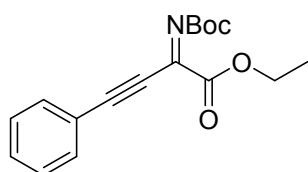

**Ethyl (*E*)-2-((*tert*-butoxycarbonyl)imino)-4-phenylbut-3-ynoate (**2a**):**  $^1\text{H NMR}$  (300 MHz,  $\text{CDCl}_3$ )  $\delta$  7.55 (dt,  $J = 7.0, 1.5$  Hz, 2H), 7.51-7.43 (m, 1H), 7.43-7.34 (m, 2H), 4.42 (q,  $J = 7.1$  Hz, 2H), 1.58 (s, 9H), 1.41 (t,  $J = 7.1$  Hz,

3H).

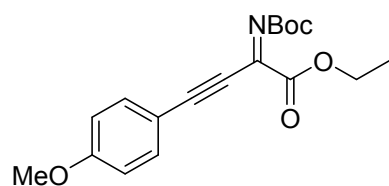

**Ethyl (*E*)-2-((*tert*-butoxycarbonyl)imino)-4-(4-methoxyphenyl)but-3-ynoate (2b):**  $^1\text{H}$  NMR (300 MHz,  $\text{CDCl}_3$ )  $\delta$  7.50 (d,  $J = 8.7$  Hz, 2H), 6.89 (d,  $J = 8.9$  Hz, 2H), 4.41 (q,  $J = 7.2$  Hz, 2H), 3.84 (s, 3H), 1.58 (s, 9H), 1.40 (t,  $J = 7.1$  Hz, 3H).

**Ethyl (*E*)-2-((*tert*-butoxycarbonyl)imino)-4-(*m*-tolyl)but-3-ynoate (2c)**

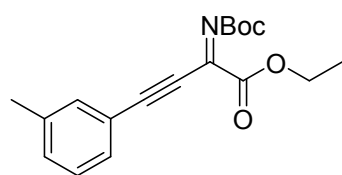

$^1\text{H}$  NMR (300 MHz,  $\text{CDCl}_3$ )  $\delta$  7.36 (d,  $J = 7.6$  Hz, 2H), 7.28 (s, 2H), 4.42 (q,  $J = 7.1$  Hz, 2H), 2.35 (s, 3H), 1.58 (s, 9H), 1.41 (t,  $J = 7.1$  Hz, 3H).

**Ethyl (*E*)-2-((*tert*-butoxycarbonyl)imino)-4-(*p*-tolyl)but-3-ynoate (2d)**

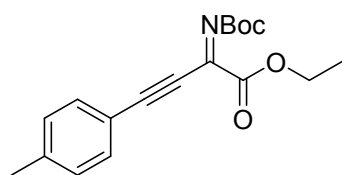

$^1\text{H}$  NMR (300 MHz,  $\text{CDCl}_3$ )  $\delta$  7.44 (d,  $J = 7.9$  Hz, 2H), 7.19 (d,  $J = 7.9$  Hz, 2H), 4.41 (q,  $J = 7.1$  Hz, 2H), 2.39 (s, 3H), 1.57 (s, 9H), 1.40 (d,  $J = 7.2$  Hz, 3H).

**Ethyl (*E*)-2-((*tert*-butoxycarbonyl)imino)-4-(2-chlorophenyl)but-3-ynoate (2e)**

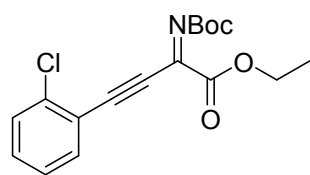

$^1\text{H}$  NMR (300 MHz,  $\text{CDCl}_3$ )  $\delta$  7.56 (d,  $J = 7.6$  Hz, 1H), 7.46 (dd,  $J = 8.2, 1.5$  Hz, 1H), 7.43-7.35 (m, 1H), 7.30 (dd,  $J = 7.5, 1.5$  Hz, 1H), 4.43 (q,  $J = 7.1$  Hz, 2H), 1.57 (s, 9H), 1.41 (t,  $J = 7.2$  Hz, 3H).

**Ethyl (*E*)-2-((*tert*-butoxycarbonyl)imino)-4-(3-chlorophenyl)but-3-ynoate (2f)**

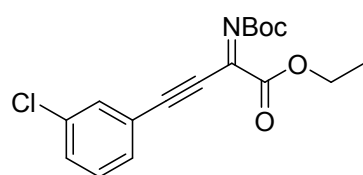

$^1\text{H}$  NMR (300 MHz,  $\text{CDCl}_3$ )  $\delta$  7.53 (s, 1H), 7.49 – 7.38 (m, 2H), 7.33 (t,  $J = 7.9$  Hz, 1H), 4.42 (q,  $J = 7.1$  Hz, 2H), 1.58 (s, 9H), 1.41 (t,  $J = 7.8$  Hz, 3H).

**Ethyl (*E*)-2-((*tert*-butoxycarbonyl)imino)-4-(4-chlorophenyl)but-3-ynoate (2g)**

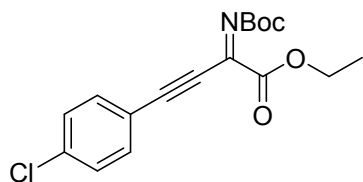

$^1\text{H NMR}$  (300 MHz,  $\text{CDCl}_3$ )  $\delta$  7.48 (d,  $J = 8.2$  Hz, 2H), 7.37 (d,  $J = 8.7$  Hz, 2H), 4.42 (q,  $J = 7.2$  Hz, 2H), 1.57 (s, 9H), 1.41 (t,  $J = 7.2$  Hz, 3H).

**Ethyl (*E*)-4-(4-bromophenyl)-2-((*tert*-butoxycarbonyl)imino)but-3-ynoate (2h)**

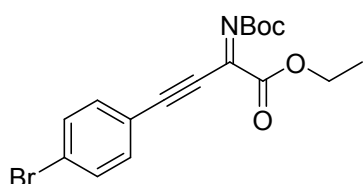

$^1\text{H NMR}$  (300 MHz,  $\text{CDCl}_3$ )  $\delta$  7.54 (d,  $J = 7.5$  Hz, 2H), 7.40 (d,  $J = 8.3$  Hz, 2H), 4.42 (q,  $J = 7.1$  Hz, 2H), 1.57 (s, 9H), 1.41 (t,  $J = 7.3$  Hz, 3H).

**Ethyl (*E*)-2-((*tert*-butoxycarbonyl)imino)-4-(4-fluorophenyl)but-3-ynoate (2i)**

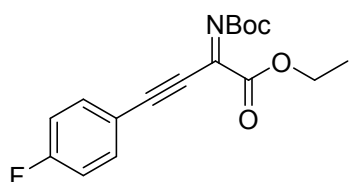

$^1\text{H NMR}$  (300 MHz,  $\text{CDCl}_3$ )  $\delta$  7.61–7.49 (m, 2H), 7.15–7.03 (m, 2H), 4.41 (q,  $J = 7.1$  Hz, 2H), 1.57 (s, 9H), 1.41 (t,  $J = 7.1$  Hz, 3H).

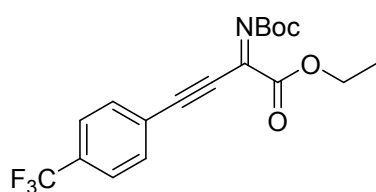

**Ethyl (*E*)-2-((*tert*-butoxycarbonyl)imino)-4-(4-(trifluoromethyl)phenyl)but-3-ynoate (2j):**  $^1\text{H NMR}$  (300 MHz,  $\text{CDCl}_3$ )  $\delta$  7.66 (s, 4H), 4.43 (q,  $J = 6.9$  Hz, 2H), 1.57 (s, 9H), 1.42 (t,  $J = 7.1$  Hz, 3H).

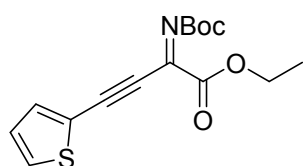

**Ethyl (*E*)-2-((*tert*-butoxycarbonyl)imino)-4-(thiophen-2-yl)but-3-ynoate (2k):**  $^1\text{H NMR}$  (300 MHz,  $\text{CDCl}_3$ )  $\delta$  7.52 (d,  $J = 5.0$  Hz, 1H), 7.46 (d,  $J = 3.8$  Hz, 1H), 7.08 (dd,  $J = 5.1, 3.7$  Hz, 1H), 4.42 (q,  $J = 7.0$  Hz, 2H), 1.59 (s, 9H), 1.41 (t,  $J = 7.2$  Hz, 3H).



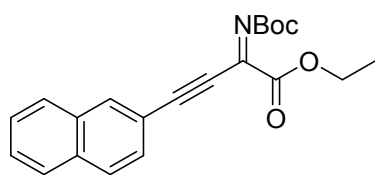

**Ethyl (*E*)-2-((*tert*-butoxycarbonyl)imino)-4-(naphthalen-2-yl)but-3-ynoate (2l):**  $^1\text{H}$  NMR (300 MHz,  $\text{CDCl}_3$ )  $\delta$  8.12 (s, 1H), 7.85 (dd,  $J = 8.8, 2.9$  Hz, 3H), 7.69–7.45 (m, 3H), 4.45 (q,  $J = 7.1$  Hz, 2H), 1.61 (s, 9H), 1.43 (t,  $J = 7.1$  Hz, 3H).

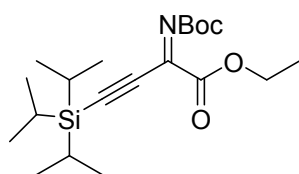

**Ethyl (*E*)-2-((*tert*-butoxycarbonyl)imino)-4-(triisopropylsilyl)but-3-ynoate (2m):**  $^1\text{H}$  NMR (300 MHz,  $\text{CDCl}_3$ )  $\delta$  4.36 (q,  $J = 7.2$  Hz, 2H), 1.54 (s, 9H), 1.36 (t,  $J = 7.1$  Hz, 3H), 1.10 (d,  $J = 3.9$  Hz, 21H).

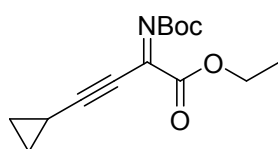

**Ethyl (*E*)-2-((*tert*-butoxycarbonyl)imino)-4-cyclopropylbut-3-ynoate (2n):**  $^1\text{H}$  NMR (300 MHz,  $\text{CDCl}_3$ )  $\delta$  4.35 (q,  $J = 7.1$  Hz, 2H), 1.54 (s, 9H), 1.47 (dt,  $J = 8.3, 5.0$  Hz, 1H), 1.36 (t,  $J = 7.1$  Hz, 3H), 1.01 (dt,  $J = 8.5, 2.9$  Hz, 2H), 0.95 – 0.90 (m, 2H).

### 2.3 Catalytic enantioselective Mannich reaction of 5-amino-isoxazole 1 with $\beta,\gamma$ -alkynyl- $\alpha$ -imino ester 2:

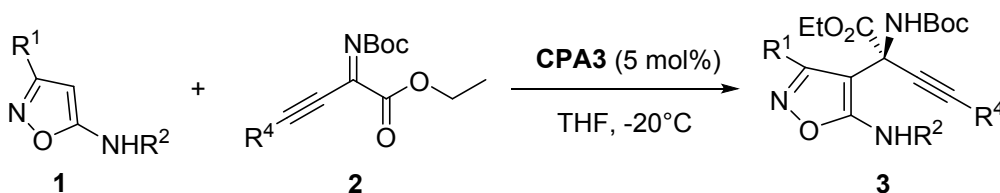

5-Amino-isoxazole **1** (0.10 mmol),  $\beta,\gamma$ -alkynyl- $\alpha$ -imino ester **2** (0.12 mmol) and **CPA3** (2.9 mg, 5 mol%) were dissolved in THF (0.5 mL, 0.2 M) in a flame-dried vial equipped with a magnetic stirring bar. The reaction mixture was stirred at  $-20$  °C for 36 hours. The mixture was subjected to chromatography on silica gel (petroleum ether/ EtOAc =10:1) to afford the desired product **3**.

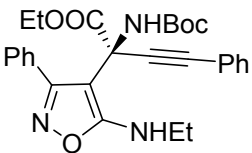

**Ethyl (*S*)-2-((*tert*-butoxycarbonyl)amino)-2-(5-(ethylamino)-3-phenylisoxazol-4-yl)-4-phenylbut-3-ynoate (3aa):** white solid, m.p.: 125.1-126.6 °C, 48.5 mg, 99% yield, ee = 95%, HPLC conditions: Chiralpak IC-H (isopropyl alcohol/n-hexane: 20/80, 1.0 mL/min.,  $t_{\text{major}} = 6.512$  min.,  $t_{\text{minor}} = 6.965$  min.).  $[\alpha]_{\text{D}}^{20} = -84.5$  (c 1.0, dichloromethane).  $^1\text{H}$  NMR (300 MHz,  $\text{CDCl}_3$ )  $\delta$  7.53-7.45 (m, 2H), 7.42-7.29 (m, 8H), 6.18 (s, 2H), 3.91 (dd,  $J = 10.7, 7.1$  Hz, 1H), 3.58-3.44 (m, 3H), 1.46 (s, 9H), 1.27 (t,  $J = 7.2$  Hz, 3H), 1.08 (t,  $J = 7.1$  Hz, 3H).  $^{13}\text{C}$  NMR (75 MHz,  $\text{CDCl}_3$ )  $\delta$  168.36, 168.13, 162.49, 154.18, 131.70, 129.81, 129.26, 129.16, 128.77, 128.24, 128.04, 121.83, 87.22, 84.75, 84.63, 80.39, 63.26, 53.38, 37.90, 28.32, 15.59, 13.47. HRMS (ESI) Calcd for  $\text{C}_{28}\text{H}_{32}\text{N}_3\text{O}_5^+$   $[\text{M}+\text{H}]^+$  490.2337; Found: 490.2336.

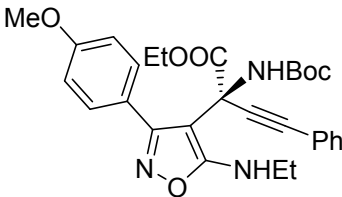

**Ethyl (*S*)-2-((*tert*-butoxycarbonyl)amino)-2-(5-(ethylamino)-3-(4-methoxyphenyl)isoxazol-4-yl)-4-phenylbut-3-ynoate (3ba):** white solid, m.p.: 127.7-128.3 °C, 58.7 mg, 98% yield, ee = 94%, HPLC conditions: ChiralpakAD-H (isopropyl alcohol/n-hexane: 20/80, 1.0 mL/min.,  $t_{\text{major}} = 5.874$  min.,  $t_{\text{minor}} = 7.161$  min.).  $[\alpha]_{\text{D}}^{20} = -81.0$  (c 1.0, dichloromethane).  $^1\text{H}$  NMR (300 MHz,  $\text{CDCl}_3$ )  $\delta$  7.47-7.39 (m, 2H), 7.32 (q,  $J = 5.9, 5.2$  Hz, 5H), 6.95-6.84 (m, 2H), 6.15 (s, 2H), 3.94 (q,  $J = 8.7, 7.3$  Hz, 1H), 3.80 (s, 3H), 3.63 (s, 1H), 3.54-3.45 (m, 2H), 1.46 (s, 9H), 1.26 (t,  $J = 7.1$  Hz, 3H), 1.10 (t,  $J = 7.1$  Hz, 3H).  $^{13}\text{C}$  NMR (75 MHz,  $\text{CDCl}_3$ )  $\delta$  168.24, 162.25, 160.39, 154.19, 131.69, 130.48, 128.76, 128.24, 121.99, 121.86, 113.48, 87.20, 84.80, 84.60, 80.39, 63.31, 55.20, 53.40, 37.86, 28.31, 15.60, 13.52. HRMS (ESI) Calcd. for  $\text{C}_{29}\text{H}_{34}\text{N}_3\text{O}_6^+$   $[\text{M}+\text{H}]^+$  520.2442; Found: 520.2391.

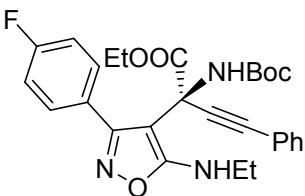

**Ethyl (*S*)-2-((*tert*-butoxycarbonyl)amino)-2-(5-(ethylamino)-3-(4-fluorophenyl)isoxazol-4-yl)-4-phenylbut-3-ynoate (3ca):** white solid, m.p.: 110.2-111.0 °C, 48.8 mg,

96% yield, ee = 92%, HPLC conditions: Chiralpak AD-H (isopropyl alcohol/n-hexane: 20/80, 1.0 mL/min.,  $t_{\text{major}} = 4.777$  min.,  $t_{\text{minor}} = 5.823$  min.).  $[\alpha]_{\text{D}}^{20} = -89.0$  (c 1.0, dichloromethane).  $^1\text{H}$  NMR (300 MHz,  $\text{CDCl}_3$ )  $\delta$  7.65-7.41 (m, 2H), 7.40-7.25 (m, 5H), 7.07 (dd,  $J = 9.9, 7.4$  Hz, 2H), 6.15 (s, 2H), 3.97 (t,  $J = 9.0$  Hz, 1H), 3.62 (s, 1H), 3.55-3.46 (m, 2H), 1.45 (s, 9H), 1.27 (t,  $J = 7.2$  Hz, 3H), 1.11 (t,  $J = 7.1$  Hz, 3H).  $^{13}\text{C}$  NMR (75 MHz,  $\text{CDCl}_3$ )  $\delta$  168.31, 168.12, 163.37 (d,  $J = 247.43$  Hz), 161.63, 154.16, 131.64, 131.11 (d,  $J = 8.33$  Hz), 128.86, 128.28, 125.87 (d,  $J = 3.08$  Hz), 121.70, 115.11 (d,  $J = 21.53$  Hz), 87.06, 84.84, 84.61, 80.54, 64.90, 63.34, 53.41, 37.88, 28.29, 15.57, 13.52. HRMS (ESI) Calcd. for  $\text{C}_{28}\text{H}_{31}\text{FN}_3\text{O}_5^+$   $[\text{M}+\text{H}]^+$  508.2242; Found: 508.2234.

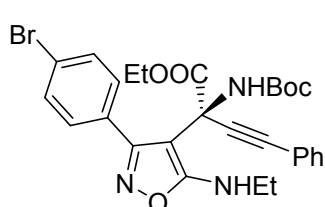

**Ethyl (*S*)-2-(3-(4-bromophenyl)-5-(ethylamino)isoxazol-4-yl)-2-((*tert*-butoxycarbonyl)amino)-4-phenylbut-3-ynoate (**3da**):** white solid, m.p.:126.1–128.5 °C, 56.2 mg, 99% yield, ee = 88%, HPLC conditions: Chiralpak AD-H

(isopropyl alcohol/n-hexane: 20/80, 1.0 mL/min.,  $t_{\text{major}} = 5.410$  min.,  $t_{\text{minor}} = 6.499$  min.).  $[\alpha]_{\text{D}}^{20} = -73.3$  (c 1.0, dichloromethane).  $^1\text{H}$  NMR (300 MHz,  $\text{CDCl}_3$ )  $\delta$  7.51 (d,  $J = 8.4$  Hz, 2H), 7.38 (d,  $J = 8.4$  Hz, 2H), 7.31 (d,  $J = 7.2$  Hz, 5H), 6.12 (s, 2H), 4.07–3.92 (m, 1H), 3.68 (s, 1H), 3.58-3.41 (m, 2H), 1.45 (s, 9H), 1.27 (t,  $J = 7.2$  Hz, 3H), 1.13 (t,  $J = 7.1$  Hz, 3H).  $^{13}\text{C}$  NMR (75 MHz,  $\text{CDCl}_3$ )  $\delta$  168.25, 168.09, 161.62, 154.15, 131.62, 131.22, 130.81, 128.85, 128.28, 123.69, 121.64, 86.88, 85.02, 84.58, 80.60, 63.39, 53.49, 37.89, 28.27, 15.57, 13.56. HRMS (ESI) Calcd for  $\text{C}_{28}\text{H}_{31}\text{BrN}_3\text{O}_5^+$   $[\text{M}+\text{H}]^+$  568.1442; Found: 568.1430.

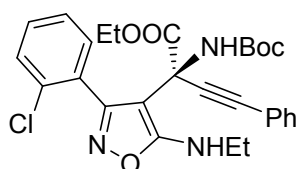

**Ethyl (*S*)-2-((*tert*-butoxycarbonyl)amino)-2-(3-(2-chlorophenyl)-5-(ethylamino)isoxazol-4-yl)-4-phenylbut-3-ynoate (**3ea**):** yellow solid, m.p.:100.6-102.8 °C, 51.9 mg, 99% yield, ee = 84%, HPLC conditions: Chiralpak IC-H

(isopropyl alcohol/n-hexane: 20/80, 1.0 mL/min.,  $t_{\text{major}} = 18.661$  min.,  $t_{\text{minor}} = 9.796$  min.).  $[\alpha]_{\text{D}}^{20} = -42.4$  (c 1.0, dichloromethane).  $^1\text{H}$  NMR (300 MHz,  $\text{CDCl}_3$ )  $\delta$

7.38-7.21 (m, 9H), 6.11 (s, 1H), 5.80 (s, 1H), 4.09 (d,  $J = 8.8$  Hz, 1H), 3.93 (s, 1H), 3.51 (qd,  $J = 7.2, 5.8$  Hz, 2H), 1.42 (s, 9H), 1.27 (dq,  $J = 13.9, 7.2, 6.6$  Hz, 6H).  $^{13}\text{C}$  NMR (75 MHz,  $\text{CDCl}_3$ )  $\delta$  167.80, 167.63, 159.86, 153.85, 134.19, 131.88, 131.63, 130.36, 129.34, 128.96, 128.69, 128.10, 126.06, 121.73, 87.26, 84.78, 84.52, 80.36, 63.13, 53.65, 37.85, 28.23, 15.50, 13.65. HRMS (ESI) Calcd. for  $\text{C}_{28}\text{H}_{31}\text{ClN}_3\text{O}_5^+$   $[\text{M}+\text{H}]^+$  524.1947; Found: 524.1939.

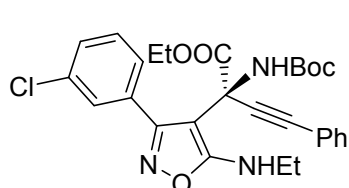

**Ethyl (S)-2-((tert-butoxycarbonyl)amino)-2-(3-(3-chlorophenyl)-5-(ethylamino)isoxazol-4-yl)-4-**

**phenylbut-3-ynoate (3fa):** light yellow solid, m.p.: 101.5–104.0 °C, 50.8 mg, 97% yield, ee = 86%, HPLC

condition: Chiralpak IC-H (isopropyl alcohol/n-hexane: 20/80, 1.0 mL/min.,  $t_{\text{major}} = 7.125$  min.,  $t_{\text{minor}} = 9.113$  min.).  $[\alpha]_{\text{D}}^{20} = -61.2$  (c 1.0, dichloromethane).  $^1\text{H}$  NMR (300 MHz,  $\text{CDCl}_3$ )  $\delta$  7.52 (s, 1H), 7.46-7.26 (m, 8H), 6.10 (d,  $J = 20.2$  Hz, 2H), 4.01 (dd,  $J = 10.6, 7.1$  Hz, 1H), 3.71 (d,  $J = 6.9$  Hz, 1H), 3.56-3.43 (m, 2H), 1.45 (s, 9H), 1.27 (t,  $J = 7.2$  Hz, 3H), 1.15 (t,  $J = 7.1$  Hz, 3H).  $^{13}\text{C}$  NMR (75 MHz,  $\text{CDCl}_3$ )  $\delta$  168.22, 167.99, 161.31, 154.11, 133.90, 131.62, 129.26, 128.83, 128.21, 127.41, 121.59, 86.99, 84.96, 84.52, 80.55, 63.40, 53.40, 37.86, 28.24, 15.52, 13.49. HRMS (ESI) Calcd. for  $\text{C}_{28}\text{H}_{31}\text{ClN}_3\text{O}_5^+$   $[\text{M}+\text{H}]^+$  524.1947; Found: 524.1927.

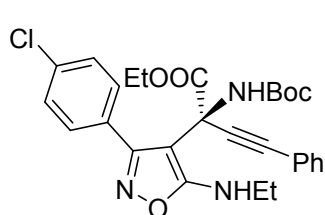

**Ethyl (S)-2-((tert-butoxycarbonyl)amino)-2-(3-(4-chlorophenyl)-5-(ethylamino)isoxazol-4-yl)-4-**

**phenylbut-3-ynoate (3ga):** yellow solid, m.p.: 134.1-135.9 °C, 51.9 mg, 99% yield, ee = 89%, HPLC

conditions: Chiralpak AD-H (ethanol/n-hexane: 20/80, 1.0 mL/min.,  $t_{\text{major}} = 5.520$  min.,  $t_{\text{minor}} = 9.050$  min.).  $[\alpha]_{\text{D}}^{20} = -78.7$  (c 1.0, dichloromethane).  $^1\text{H}$  NMR (300 MHz,  $\text{CDCl}_3$ )  $\delta$  7.48-7.40 (m, 2H), 7.40-7.33 (m, 2H), 7.32-7.28 (m, 5H), 6.12 (s, 2H), 3.99 (dq,  $J = 13.8, 7.2$  Hz, 1H), 3.65 (s, 1H), 3.56-3.44 (m, 2H), 1.45 (s, 9H), 1.27 (t,  $J = 7.2$  Hz, 3H), 1.12 (t,  $J = 7.1$  Hz, 3H).  $^{13}\text{C}$  NMR (75 MHz,  $\text{CDCl}_3$ )  $\delta$  168.28, 168.10, 161.58, 154.16, 135.42, 131.63, 130.55, 128.86, 128.28, 121.66, 86.95, 84.97, 84.59,

80.59, 63.38, 53.46, 37.90, 28.29, 15.57, 13.55. HRMS (ESI) Calcd. for  $C_{28}H_{31}ClN_3O_5^+$   $[M+H]^+$  524.1947; Found: 524.1936.

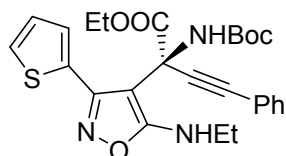

**Ethyl (S)-2-((tert-butoxycarbonyl)amino)-2-(5-(ethylamino)-3-(thiophen-2-yl)isoxazol-4-yl)-4-phenylbut-3-ynoate (3ha):** white solid, m.p.: 110.7-111.4 °C, 49.1 mg, 99% yield, ee = 94%, HPLC conditions: Chiralpak AD-H

(ethanol/n-hexane: 10/90, 1.0 mL/min.,  $t_{major} = 7.192$  min.,  $t_{minor} = 9.381$  min.).  $[\alpha]_D^{20} = -52.2$  (c 1.0, dichloromethane).  $^1H$  NMR (300 MHz,  $CDCl_3$ )  $\delta$  7.45-7.27 (m, 6H), 7.24 (d,  $J = 3.6$  Hz, 1H), 7.06 (dd,  $J = 5.1, 3.6$  Hz, 1H), 6.29 (s, 1H), 6.10 (s, 1H), 4.00 (dq,  $J = 10.5, 7.1$  Hz, 1H), 3.72 (s, 1H), 3.50 (qd,  $J = 7.2, 5.8$  Hz, 2H), 1.45 (s, 9H), 1.25 (t,  $J = 7.2$  Hz, 3H), 1.07 (t,  $J = 7.1$  Hz, 3H).  $^{13}C$  NMR (75 MHz,  $CDCl_3$ )  $\delta$  168.64, 168.16, 156.59, 154.18, 131.72, 129.40, 129.24, 128.94, 128.35, 127.29, 127.19, 121.66, 87.27, 84.70, 80.42, 63.54, 53.26, 37.90, 28.32, 15.54, 13.46. HRMS (ESI) Calcd for  $C_{26}H_{30}N_3O_5S^+$   $[M+H]^+$  496.1901; Found: 496.1836.

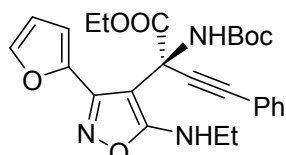

**Ethyl (S)-2-((tert-butoxycarbonyl)amino)-2-(5-(ethylamino)-3-(furan-2-yl)isoxazol-4-yl)-4-phenylbut-3-ynoate (3ia):** yellow oil, 45.1 mg, 94% yield, ee = 92%,

HPLC conditions: Chiralpak AD-H (ethanol/n-hexane:10/90, 1.0 mL/min.,  $t_{major} = 7.853$  min.,  $t_{minor} = 11.927$  min.).  $[\alpha]_D^{20} = -76.2$  (c 1.0, dichloromethane).  $^1H$  NMR (300 MHz,  $CDCl_3$ )  $\delta$  7.48 (dd,  $J = 1.8, 0.8$  Hz, 1H), 7.47-7.39 (m, 2H), 7.37-7.28 (m, 3H), 6.81- 6.71 (m, 1H), 6.45 (dd,  $J = 3.4, 1.8$  Hz, 1H), 6.32 (s, 1H), 6.12 (s, 1H), 4.09 (dq,  $J = 10.3, 7.1$  Hz, 1H), 3.96 (d,  $J = 8.3$  Hz, 1H), 3.55-3.42 (m, 2H), 1.42 (s, 9H), 1.24 (t,  $J = 7.1$  Hz, 3H), 1.06 (t,  $J = 7.1$  Hz, 3H).  $^{13}C$  NMR (75 MHz,  $CDCl_3$ )  $\delta$  168.38, 154.06, 153.15, 144.14, 143.36, 131.74, 128.98, 128.37, 121.62, 111.33, 110.57, 87.10, 84.76, 80.16, 63.40, 53.28, 37.96, 28.29, 15.49, 13.48. HRMS (ESI) Calcd. for  $C_{26}H_{30}N_3O_6^+$   $[M+H]^+$  480.2129; Found: 480.2106.

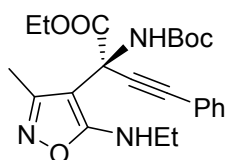

**Ethyl (S)-2-((*tert*-butoxycarbonyl)amino)-2-(5-(ethylamino)-3-methylisoxazol-4-yl)-4-phenylbut-3-ynoate (3ja):** yellow oil, 42.4 mg, 99% yield, ee = 89%, HPLC conditions: Chiralpak AD-H (ethanol/n-hexane: 20/80, 1.0 mL/min.,  $t_{\text{major}} = 6.079$  min.,  $t_{\text{minor}} = 8.919$  min.).  $[\alpha]_{\text{D}}^{20} = -20.8$  (c 1.0, dichloromethane).  $^1\text{H}$  NMR (300 MHz,  $\text{CDCl}_3$ )  $\delta$  7.45 (dt,  $J = 7.9, 2.3$  Hz, 2H), 7.35 (dd,  $J = 5.2, 2.4$  Hz, 3H), 5.66 (d,  $J = 18.2$  Hz, 2H), 4.44-4.09 (m, 2H), 3.38 (td,  $J = 7.3, 5.8$  Hz, 2H), 2.22 (s, 3H), 1.44 (s, 9H), 1.29 (t,  $J = 7.1$  Hz, 3H), 1.21 (t,  $J = 7.2$  Hz, 3H).  $^{13}\text{C}$  NMR (75 MHz,  $\text{CDCl}_3$ )  $\delta$  168.40, 166.66, 158.77, 153.83, 131.60, 128.95, 128.45, 121.83, 85.99, 85.28, 84.85, 80.69, 63.27, 54.16, 37.78, 28.23, 15.58, 13.88, 11.70. HRMS (ESI) Calcd for  $\text{C}_{23}\text{H}_{30}\text{N}_3\text{O}_5^+$   $[\text{M}+\text{H}]^+$  428.2180; Found: 42.2159.

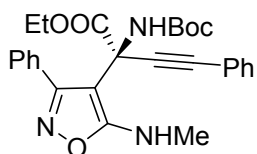

**Ethyl (S)-2-((*tert*-butoxycarbonyl)amino)-2-(5-(methylamino)-3-phenylisoxazol-4-yl)-4-phenylbut-3-ynoate (3la):** white solid, m.p.: 126.5-130.1 °C, 46.2 mg, 97% yield, ee = 93%, HPLC conditions: Chiralpak AD-H (isopropyl alcohol/n-hexane: 20/80, 1.0 mL/min.,  $t_{\text{major}} = 4.623$  min.,  $t_{\text{minor}} = 5.757$  min.).  $[\alpha]_{\text{D}}^{20} = -95.7$  (c 1.0, dichloromethane).  $^1\text{H}$  NMR (300 MHz,  $\text{CDCl}_3$ )  $\delta$  7.49 (dd,  $J = 6.7, 3.1$  Hz, 2H), 7.42-7.36 (m, 3H), 7.31 (t,  $J = 3.2$  Hz, 5H), 6.22 (s, 1H), 6.13 (s, 1H), 3.91 (d,  $J = 11.3$  Hz, 1H), 3.50 (s, 1H), 3.13 (dd,  $J = 5.5, 2.1$  Hz, 3H), 1.46 (s, 9H), 1.07 (t,  $J = 7.1$  Hz, 3H).  $^{13}\text{C}$  NMR (75 MHz,  $\text{CDCl}_3$ )  $\delta$  168.90, 168.12, 162.65, 154.26, 131.75, 129.74, 129.31, 129.14, 128.81, 128.26, 128.07, 121.79, 87.27, 84.60, 80.44, 63.32, 53.28, 29.62, 28.33, 13.46. HRMS(ESI) Calcd for  $\text{C}_{27}\text{H}_{30}\text{N}_3\text{O}_5^+$   $[\text{M}+\text{H}]^+$  476.2180; Found: 476.2164.

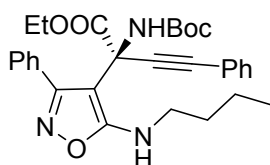

**Ethyl (S)-2-((*tert*-butoxycarbonyl)amino)-2-(5-(butylamino)-3-phenylisoxazol-4-yl)-4-phenylbut-3-ynoate (3ma):** white solid, m.p.: 92.7-94.6 °C, 51.3 mg, 99% yield, ee = 96%, HPLC conditions: Chiralpak AD-H (ethanol/n-hexane: 10/90, 1.0 mL/min.,  $t_{\text{major}} = 4.956$  min.,  $t_{\text{minor}} = 12.587$  min.).  $[\alpha]_{\text{D}}^{20} = -73.8$  (c 1.0,

dichloromethane).  $^1\text{H}$  NMR (300 MHz,  $\text{CDCl}_3$ )  $\delta$  7.53-7.45 (m, 2H), 7.45-7.35 (m, 3H), 7.31 (d,  $J = 2.7$  Hz, 5H), 6.25 (s, 2H), 3.88 (d,  $J = 8.0$  Hz, 1H), 3.46 (q,  $J = 6.7$  Hz, 3H), 1.68-1.57 (m, 2H), 1.46 (s, 9H), 1.39 (t,  $J = 7.8$  Hz, 2H), 1.07 (t,  $J = 7.1$  Hz, 3H), 0.88 (t,  $J = 7.2$  Hz, 3H).  $^{13}\text{C}$  NMR (75 MHz,  $\text{CDCl}_3$ )  $\delta$  168.42, 168.13, 162.49, 154.21, 131.69, 129.80, 129.25, 129.13, 128.75, 128.21, 128.03, 121.81, 86.97, 84.71, 84.55, 80.39, 63.25, 53.36, 42.66, 32.19, 28.29, 19.80, 13.62, 13.45. HRMS (ESI) Calcd for  $\text{C}_{30}\text{H}_{36}\text{N}_3\text{O}_5^+$   $[\text{M}+\text{H}]^+$  518.2649; Found: 518.2633.

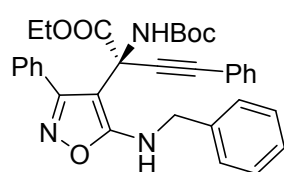

**Ethyl (*S*)-2-(5-(benzylamino)-3-phenylisoxazol-4-yl)-2-((*tert*-butoxycarbonyl)amino)-4-phenylbut-3-ynoate (**3na**):**

light yellow solid, m.p.: 130.2-131.7 °C, 54.6 mg, 99% yield, ee = 93%, HPLC conditions: Chiralpak AD-H (ethanol/n-hexane :10/90, 1.0 mL/min.,  $t_{\text{major}} = 7.380$  min.,  $t_{\text{minor}} = 12.349$  min.).  $[\alpha]_{\text{D}}^{20} = -73.9$  (c 1.0, dichloromethane).  $^1\text{H}$  NMR (300 MHz,  $\text{CDCl}_3$ )  $\delta$  7.52-7.48 (m, 2H), 7.44-7.39 (m, 5H), 7.31-7.18 (m, 8H), 6.70 (s, 1H), 6.31 (s, 1H), 4.78-4.60 (m, 2H), 3.89 (dq,  $J = 14.2, 7.3$  Hz, 1H), 3.45 (s, 1H), 1.48 (s, 9H), 1.06 (t,  $J = 7.1$  Hz, 3H).  $^{13}\text{C}$  NMR (75 MHz,  $\text{CDCl}_3$ )  $\delta$  168.05, 162.58, 154.26, 138.53, 131.72, 129.68, 129.35, 129.10, 128.72, 128.47, 128.18, 128.10, 127.52, 127.23, 121.65, 87.71, 84.62, 84.52, 80.48, 63.33, 53.21, 46.94, 28.32, 13.43. HRMS (ESI) Calcd for  $\text{C}_{33}\text{H}_{34}\text{N}_3\text{O}_5^+$   $[\text{M}+\text{H}]^+$  552.2493; Found: 552.2474.

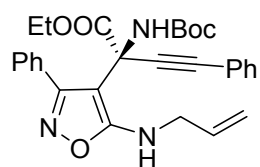

**Ethyl (*S*)-2-(5-(allylamino)-3-phenylisoxazol-4-yl)-2-((*tert*-butoxycarbonyl)amino)-4-phenylbut-3-ynoate (**3oa**):**

yellow solid, m.p.: 126.4-128.3 °C, 49.7 mg, 99% yield, ee = 94%, HPLC conditions: Chiralpak AD-H (ethanol/n-hexane: 20/80, 1.0 mL/min.,  $t_{\text{major}} = 5.215$  min.,  $t_{\text{minor}} = 9.114$  min.).  $[\alpha]_{\text{D}}^{20} = -79.8$  (c 1.0, dichloromethane).  $^1\text{H}$  NMR (300 MHz,  $\text{CDCl}_3$ )  $\delta$  7.52-7.47 (m, 2H), 7.41-7.37 (m, 3H), 7.36-7.26 (m, 5H), 6.39 (s, 1H), 6.26 (s, 1H), 6.04 – 5.91 (m, 1H), 5.36 (dq,  $J = 17.2, 1.6$  Hz, 1H), 5.23-5.02 (m, 1H), 4.11 (ddt,  $J = 6.8, 5.3, 1.7$  Hz, 2H), 3.89 (t,  $J = 9.0$  Hz, 1H), 3.48 (s, 1H), 1.46 (s, 9H), 1.07 (t,  $J = 7.1$  Hz, 3H).  $^{13}\text{C}$  NMR (75 MHz,  $\text{CDCl}_3$ )  $\delta$  168.08, 162.60, 154.22,

134.57, 131.77, 129.70, 129.32, 129.13, 128.80, 128.22, 128.08, 121.75, 116.08, 87.65, 84.62, 80.47, 63.32, 53.28, 45.32, 28.32, 13.45. HRMS (ESI) Calcd for  $C_{29}H_{32}N_3O_5^+$   $[M+H]^+$  502.2336; Found: 502.2321.

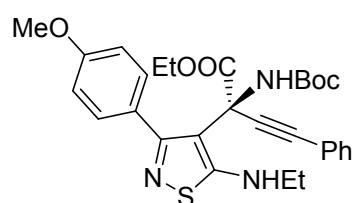

**Ethyl (S)-2-((tert-butoxycarbonyl)amino)-2-(5-(ethylamino)-3-(4-methoxyphenyl)isothiazol-4-yl)-4-**

**phenylbut-3-ynoate (3qa):** light yellow solid, m.p.: 156.3–158.2 °C, 37.5 mg, 70% yield, ee = 36% HPLC

conditions: Chiralpak IC-H (isopropyl alcohol/n-hexane: 30/70, 1.0 mL/min.,  $t_{major}$  = 21.231 min.,  $t_{minor}$  = 28.674 min.).  $[\alpha]_D^{20}$  = -75.8 (c 1.0, dichloromethane).  $^1H$  NMR (400 MHz,  $CDCl_3$ )  $\delta$  7.41-7.36 (m, 2H), 7.36-7.26 (m, 5H), 6.91-6.78 (m, 2H), 6.64 (s, 1H), 6.20 (s, 1H), 4.06-3.91 (m, 1H), 3.79 (s, 3H), 3.70 (d,  $J$  = 9.0 Hz, 1H), 3.23 (m, 2H), 1.46 (s, 9H), 1.32 (t,  $J$  = 7.1 Hz, 3H), 1.16 (t,  $J$  = 7.1 Hz, 3H).  $^{13}C$  NMR (101 MHz,  $CDCl_3$ )  $\delta$  168.30, 167.25, 159.91, 154.35, 131.69, 130.51, 129.79, 128.71, 128.24, 122.10, 113.12, 107.36, 85.44, 85.24, 63.27, 55.72, 55.22, 42.93, 28.38, 14.57, 13.55. HRMS (ESI) Calcd for  $C_{29}H_{34}N_3O_5S^+$   $[M+H]^+$  536.2214; Found: 536.2223.

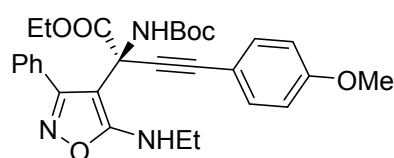

**Ethyl (S)-2-((tert-butoxycarbonyl)amino)-2-(5-(ethylamino)-3-phenylisoxazol-4-yl)-4-(4-methoxyphenyl)but-3-ynoate (3ab):** light yellow solid, m.p.:

109.2–110.5 °C, 51.5 mg, 99% yield, ee = 96%, HPLC conditions: Chiralpak AD-H (ethanol/n-hexane: 20/80, 1.0 mL/min,  $t_{major}$  = 5.469 min.,  $t_{minor}$  = 16.006 min.).  $[\alpha]_D^{20}$  = -75.2 (c 1.0, dichloromethane).  $^1H$  NMR (300 MHz,  $CDCl_3$ )  $\delta$  7.52-7.44 (m, 2H), 7.39 (dt,  $J$  = 4.9, 3.0 Hz, 3H), 7.27 (d,  $J$  = 8.6 Hz, 2H), 6.87-6.76 (m, 2H), 6.16 (s, 2H), 3.91 (dd,  $J$  = 10.6, 7.0 Hz, 1H), 3.80 (s, 3H), 3.61-3.42 (m, 3H), 1.45 (s, 9H), 1.27 (t,  $J$  = 7.2 Hz, 3H), 1.08 (t,  $J$  = 7.1 Hz, 3H).  $^{13}C$  NMR (75 MHz,  $CDCl_3$ )  $\delta$  168.27, 162.49, 159.97, 154.18, 133.19, 129.84, 129.24, 129.16, 128.04, 113.89, 113.83, 87.35, 84.69, 83.35, 80.31, 63.22, 55.26, 53.37, 37.90, 28.33, 15.61, 13.49. HRMS (ESI) Calcd for  $C_{29}H_{34}N_3O_6^+$   $[M+H]^+$  520.2442; Found: 520.2429.



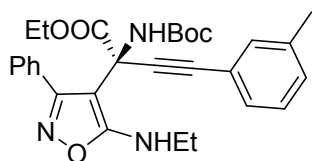

**Ethyl (S)-2-((tert-butoxycarbonyl)amino)-2-(5-(ethylamino)-3-phenylisoxazol-4-yl)-4-(m-tolyl)but-3-**

**ynoate (3ac):** white solid, m.p.: 106.5–109.6 °C, 50.0 mg, 99% yield, ee = 84%, HPLC conditions: Chiralpak IC-H

(isopropyl alcohol/n-hexane: 20/80, 1.0 mL/min,  $t_{\text{major}} = 6.399$  min.,  $t_{\text{minor}} = 7.249$  min.).  $[\alpha]_{\text{D}}^{20} = -86.4$  (c 1.0, dichloromethane).  $^1\text{H}$  NMR (300 MHz,  $\text{CDCl}_3$ )  $\delta$  7.51-7.46 (m, 2H), 7.44-7.32 (m, 3H), 7.16 (d,  $J = 4.1$  Hz, 4H), 6.17 (s, 2H), 3.91 (dd,  $J = 10.5, 7.0$  Hz, 1H), 3.64-3.42 (m, 3H), 2.31 (s, 3H), 1.46 (s, 9H), 1.28 (t,  $J = 7.2$  Hz, 3H), 1.08 (t,  $J = 7.1$  Hz, 3H).  $^{13}\text{C}$  NMR (75 MHz,  $\text{CDCl}_3$ )  $\delta$  169.38, 169.17, 163.50, 155.17, 138.97, 133.33, 130.80, 130.67, 130.26, 130.16, 129.75, 129.14, 129.06, 122.61, 88.24, 85.82, 85.33, 81.37, 64.27, 54.32, 38.90, 29.32, 22.13, 16.59, 14.48. HRMS (ESI) Calcd for  $\text{C}_{29}\text{H}_{34}\text{N}_3\text{O}_5^+$   $[\text{M}+\text{H}]^+$  504.2493; Found: 504.2476.

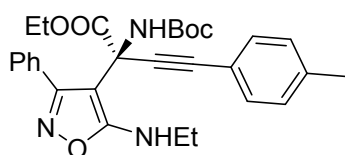

**Ethyl (S)-2-((tert-butoxycarbonyl)amino)-2-(5-(ethylamino)-3-phenylisoxazol-4-yl)-4-(p-tolyl)but-3-**

**ynoate (3ad):** white solid, m.p.: 114.9-117.2 °C, 50.0

mg, 99% yield, ee = 89%, HPLC conditions: Chiralpak AD-H (ethanol/n-hexane: 20/80, 1.0 mL/min.,  $t_{\text{major}} = 4.778$  min.,  $t_{\text{minor}} = 11.191$  min.).  $[\alpha]_{\text{D}}^{20} = -98.5$  (c 1.0, dichloromethane).  $^1\text{H}$  NMR (300 MHz,  $\text{CDCl}_3$ )  $\delta$  7.52-7.44 (m, 2H), 7.39 (dt,  $J = 4.9, 3.0$  Hz, 3H), 7.27 (d,  $J = 8.6$  Hz, 2H), 6.87-6.76 (m, 2H), 6.16 (s, 2H), 3.91 (dd,  $J = 10.6, 7.0$  Hz, 1H), 3.80 (s, 3H), 3.61-3.42 (m, 3H), 1.45 (s, 9H), 1.27 (t,  $J = 7.2$  Hz, 3H), 1.08 (t,  $J = 7.1$  Hz, 3H).  $^{13}\text{C}$  NMR (75 MHz,  $\text{CDCl}_3$ )  $\delta$  168.21, 162.48, 154.17, 139.02, 131.59, 129.81, 129.25, 129.14, 129.01, 128.04, 118.70, 86.68, 84.80, 84.00, 80.33, 63.24, 53.33, 37.89, 28.31, 21.46, 15.59, 13.46. HRMS (ESI) Calcd for  $\text{C}_{29}\text{H}_{33}\text{N}_3\text{O}_5\text{H}^+$   $[\text{M}+\text{H}]^+$  504.2493; Found: 504.2482.

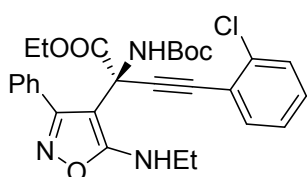

**Ethyl (S)-2-((tert-butoxycarbonyl)amino)-4-(2-chlorophenyl)-2-(5-(ethylamino)-3-phenylisoxazol-4-yl)but-3-**

**ynoate (3ae):** white solid, m.p.: 126.1-128.4 °C, 50.3

mg, 96% yield, ee = 96%, HPLC conditions: Chiralpak AD-H (ethanol/n-hexane: 20/80, 1.0 mL/min.,  $t_{\text{major}} = 5.040$  min.,  $t_{\text{minor}} = 7.766$  min.).  $[\alpha]_{\text{D}}^{20} = -115.0$  (c 1.0, dichloromethane).  $^1\text{H NMR}$  (300 MHz,  $\text{CDCl}_3$ )  $\delta$  7.53-7.43 (m, 2H), 7.43-7.30 (m, 5H), 7.29-7.22 (m, 1H), 7.18 (td,  $J = 7.5, 1.4$  Hz, 1H), 6.23 (d,  $J = 25.9$  Hz, 2H), 3.93 (dq,  $J = 14.4, 7.3$  Hz, 1H), 3.62-3.40 (m, 3H), 1.45 (s, 9H), 1.27 (t,  $J = 7.2$  Hz, 3H), 1.10 (t,  $J = 7.1$  Hz, 3H).  $^{13}\text{C NMR}$  (75 MHz,  $\text{CDCl}_3$ )  $\delta$  168.26, 167.90, 162.43, 154.01, 135.95, 133.48, 129.83, 129.73, 129.23, 129.19, 129.13, 128.02, 126.37, 121.81, 89.80, 86.78, 81.24, 80.38, 63.31, 53.42, 37.91, 28.27, 15.55, 13.48. HRMS (ESI) Calcd for  $\text{C}_{28}\text{H}_{31}\text{ClN}_3\text{O}_5^+$   $[\text{M}+\text{H}]^+$  524.1947; Found: 524.1932.

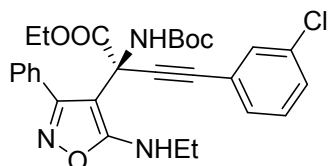

**Ethyl (S)-2-((tert-butoxycarbonyl)amino)-4-(3-chlorophenyl)-2-(5-(ethylamino)-3-phenylisoxazol-4-yl)but-3-ynoate (3af):** light yellow solid, m.p.: 107.1-109.6 °C, 51.9 mg, 99% yield, ee = 89%, HPLC conditions:

Chiralpak AD-H (ethanol/n-hexane: 20/80, 1.0 mL/min.,  $t_{\text{major}} = 4.097$  min.,  $t_{\text{minor}} = 5.100$  min.).  $[\alpha]_{\text{D}}^{20} = -78.3$  (c 1.0, dichloromethane).  $^1\text{H NMR}$  (300 MHz,  $\text{CDCl}_3$ )  $\delta$  7.56-7.43 (m, 2H), 7.43-7.33 (m, 3H), 7.33-7.16 (m, 4H), 6.14 (s, 2H), 3.92 (t,  $J = 8.5$  Hz, 1H), 3.65-3.39 (m, 3H), 1.46 (s, 9H), 1.29 (t,  $J = 7.2$  Hz, 3H), 1.10 (t,  $J = 7.1$  Hz, 3H).  $^{13}\text{C NMR}$  (75 MHz,  $\text{CDCl}_3$ )  $\delta$  168.28, 167.91, 162.51, 154.23, 134.05, 131.61, 129.75, 129.70, 129.46, 129.32, 129.17, 129.03, 128.06, 123.50, 87.38, 85.97, 83.26, 80.60, 63.38, 53.39, 37.88, 28.28, 15.61, 13.50. HRMS (ESI) Calcd for  $\text{C}_{28}\text{H}_{31}\text{ClN}_3\text{O}_5^+$   $[\text{M}+\text{H}]^+$  524.1947; Found: 524.1935.

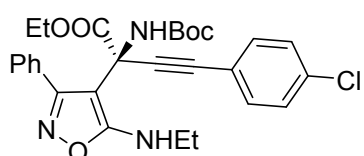

**Ethyl (S)-2-((tert-butoxycarbonyl)amino)-4-(4-chlorophenyl)-2-(5-(ethylamino)-3-phenylisoxazol-4-yl)but-3-ynoate (3ag):** light yellow solid, m.p.: 110.8-112.7 °C, 51.9 mg, 99% yield, ee = 95%, HPLC conditions: Chiralpak AD-H (ethanol/n-hexane: 20/80, 1.0 mL/min.,  $t_{\text{major}} = 5.000$  min.,  $t_{\text{minor}} = 11.618$  min.).  $[\alpha]_{\text{D}}^{20} = -95.5$  (c 1.0, dichloromethane).  $^1\text{H NMR}$  (300 MHz,  $\text{CDCl}_3$ )  $\delta$  7.53-7.44 (m, 2H), 7.44-7.33 (m, 3H), 7.30-7.19 (m, 4H), 6.14 (s, 2H), 3.92 (t,  $J = 8.9$  Hz, 1H), 3.63-3.41

(m, 3H), 1.45 (s, 9H), 1.27 (t,  $J = 7.6$  Hz, 3H), 1.09 (t,  $J = 7.1$  Hz, 3H).  $^{13}\text{C}$  NMR (75 MHz,  $\text{CDCl}_3$ )  $\delta$  168.29, 167.96, 162.48, 154.22, 134.86, 132.90, 129.71, 129.29, 129.15, 128.59, 128.04, 120.27, 87.36, 85.69, 83.56, 80.53, 63.34, 53.39, 37.86, 28.27, 15.62, 13.49. HRMS (ESI) Calcd for  $\text{C}_{28}\text{H}_{31}\text{ClN}_3\text{O}_5^+$   $[\text{M}+\text{H}]^+$  524.1947; Found: 524.1930.

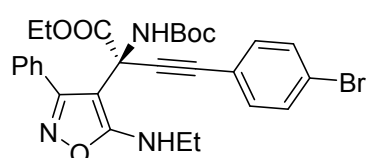

**Ethyl (S)-4-(4-bromophenyl)-2-((tert-butoxycarbonyl)amino)-2-(5-(ethylamino)-3-phenylisoxazol-4-yl)but-3-ynoate (3ah):** white solid,

m.p.: 62.8-66.8 °C, 56.2 mg, 99% yield, ee = 95%, HPLC conditions: Chiralpak OD-H (ethanol/n-hexane: 20/80, 1.0 mL/min.,  $t_{\text{major}} = 5.205$  min.,  $t_{\text{minor}} = 11.986$  min.).  $[\alpha]_{\text{D}}^{20} = -86.7$  (c 1.0, dichloromethane).  $^1\text{H}$  NMR (300 MHz,  $\text{CDCl}_3$ )  $\delta$  7.54-7.45 (m, 2H), 7.45-7.33 (m, 5H), 7.15 (d,  $J = 8.0$  Hz, 2H), 6.14 (s, 2H), 3.90 (q,  $J = 8.3, 6.9$  Hz, 1H), 3.62-3.42 (m, 3H), 1.45 (s, 9H), 1.27 (t,  $J = 7.2$  Hz, 3H), 1.09 (t,  $J = 7.2$  Hz, 3H).  $^{13}\text{C}$  NMR (75 MHz,  $\text{CDCl}_3$ )  $\delta$  168.25, 167.91, 162.46, 154.21, 133.08, 131.52, 129.73, 129.26, 129.16, 128.02, 123.10, 120.75, 86.97, 85.93, 83.65, 80.54, 63.31, 53.48, 37.86, 28.27, 15.60, 13.48. HRMS (ESI) Calcd for  $\text{C}_{28}\text{H}_{31}\text{BrN}_3\text{O}_5^+$   $[\text{M}+\text{H}]^+$  568.1442; Found: 568.1432.

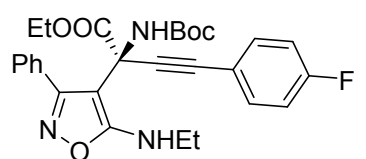

**Ethyl (S)-2-((tert-butoxycarbonyl)amino)-2-(5-(ethylamino)-3-phenylisoxazol-4-yl)-4-(4-fluorophenyl)but-3-ynoate (3ai):** yellow solid, m.p.:

104.5-108.9 °C, 50.3 mg, 99% yield, ee = 94%, HPLC conditions: Chiralpak OD-H (ethanol/n-hexane: 20/80, 1.0 mL/min.,  $t_{\text{major}} = 4.802$  min.,  $t_{\text{minor}} = 10.378$  min.).  $[\alpha]_{\text{D}}^{20} = -83.6$  (c 1.0, dichloromethane).  $^1\text{H}$  NMR (300 MHz,  $\text{CDCl}_3$ )  $\delta$  7.52-7.45 (m, 2H), 7.41 – 7.34 (m, 3H), 7.30 (d,  $J = 9.3$  Hz, 2H), 7.02-6.93 (m, 2H), 6.16 (s, 2H), 3.89 (d,  $J = 8.6$  Hz, 1H), 3.58-3.43 (m, 3H), 1.45 (s, 9H), 1.27 (t,  $J = 7.2$  Hz, 3H), 1.08 (t,  $J = 7.1$  Hz, 3H).  $^{13}\text{C}$  NMR (75 MHz,  $\text{CDCl}_3$ )  $\delta$  168.31, 168.06, 162.72 (d,  $J = 248.93$  Hz), 162.50, 154.22, 133.64 (d,  $J = 8.33$  Hz), 129.74, 129.28, 129.15, 128.04, 117.87 (d,  $J = 3.45$  Hz), 115.57 (d,  $J = 22.05$  Hz), 87.11, 84.44, 83.63, 80.48, 63.31, 53.34, 37.87,

28.29, 15.61, 13.49. HRMS (ESI) Calcd for  $C_{28}H_{31}FN_3O_5^+$   $[M+H]^+$  508.2242; Found: 508.2219.

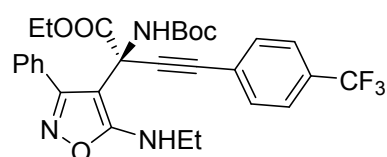

**Ethyl (S)-2-((tert-butoxycarbonyl)amino)-2-(5-(ethylamino)-3-phenylisoxazol-4-yl)-4-(4-(trifluoromethyl)phenyl)but-3-ynoate (3aj):** white solid, m.p.:

56.1-62.6 °C, 53.0 mg, 95% yield, ee = 96%, HPLC conditions: Chiralpak AD-H (ethanol/n-hexane: 20/80, 1.0 mL/min,  $t_{major}$  = 4.002 min,  $t_{minor}$  = 6.120 min).  $[\alpha]_D^{20}$  = -84.0 (c 1.0, dichloromethane).  $^1H$  NMR (300 MHz,  $CDCl_3$ )  $\delta$  7.54 (d,  $J$  = 8.0 Hz, 2H), 7.52-7.45 (m, 2H), 7.39 (dd,  $J$  = 6.1, 2.7 Hz, 5H), 6.17 (s, 2H), 3.93 (s, 1H), 3.64 – 3.43 (m, 3H), 1.46 (s, 9H), 1.28 (t,  $J$  = 7.2 Hz, 3H), 1.10 (t,  $J$  = 7.1 Hz, 3H).  $^{13}C$  NMR (75 MHz,  $CDCl_3$ )  $\delta$  168.29, 167.86, 162.53, 154.29, 131.98, 130.53 (q,  $J$  = 32.63 Hz), 129.77, 129.33, 129.25, 128.08, 125.71, 125.18 (q,  $J$  = 3.83 Hz), 123.76 (q,  $J$  = 270.60 Hz), 87.32, 86.89, 83.34, 80.71, 63.42, 53.59, 37.92, 28.31, 15.64, 13.52. HRMS (ESI) Calcd for  $C_{29}H_{31}F_3N_3O_5^+$   $[M+H]^+$  558.2210; Found: 558.2177.

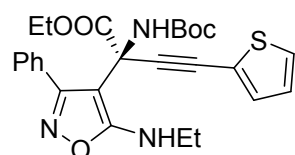

**Ethyl (S)-2-((tert-butoxycarbonyl)amino)-2-(5-(ethylamino)-3-phenylisoxazol-4-yl)-4-(thiophen-2-yl)but-3-ynoate (3ak):** yellow solid, m.p.: 101.9-104.8 °C, 48.5 mg,

97% yield, ee = 96%, HPLC conditions: Chiralpak AD-H (ethanol/n-hexane: 20/80, 1.0 mL/min.,  $t_{major}$  = 4.692 min.,  $t_{minor}$  = 8.681 min.).  $[\alpha]_D^{20}$  = -92.7 (c 1.0, dichloromethane).  $^1H$  NMR (300 MHz,  $CDCl_3$ )  $\delta$  7.54-7.44 (m, 2H), 7.39 (q,  $J$  = 3.5 Hz, 3H), 7.26 (dd,  $J$  = 4.9, 1.2 Hz, 1H), 7.11 (d,  $J$  = 3.6 Hz, 1H), 6.95 (dd,  $J$  = 5.1, 3.6 Hz, 1H), 6.14 (s, 2H), 3.90 (d,  $J$  = 9.5 Hz, 1H), 3.60-3.44 (m, 3H), 1.45 (s, 9H), 1.30 (t,  $J$  = 7.2 Hz, 3H), 1.08 (t,  $J$  = 7.2 Hz, 3H).  $^{13}C$  NMR (75 MHz,  $CDCl_3$ )  $\delta$  168.29, 167.89, 162.46, 154.17, 132.62, 129.72, 129.30, 129.16, 128.05, 127.76, 126.92, 121.64, 88.52, 86.99, 80.55, 78.19, 63.36, 53.63, 37.92, 28.30, 15.60, 13.47. HRMS (ESI) Calcd. for  $C_{26}H_{29}N_3O_5SH^+$   $[M+H]^+$  496.1901; Found: 496.1889.

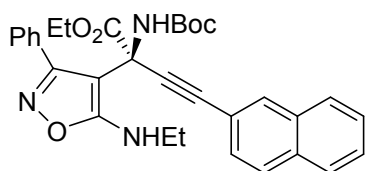

**Ethyl (*S*)-2-((*tert*-butoxycarbonyl)amino)-2-(5-(ethylamino)-3-phenylisoxazol-4-yl)-4-(naphthalen-2-yl)but-3-ynoate (**3al**):** yellow solid, m.p.:

115.9-118.2 °C, 53.5 mg, 99% yield, ee = 88%, HPLC

conditions: Chiralpak AD-H (isopropyl alcohol/n-hexane: 20/80, 1.0 mL/min.,  $t_{\text{major}} = 5.173$  min,  $t_{\text{minor}} = 6.023$  min.).  $[\alpha]_{\text{D}}^{20} = -103.8$  (c 1.0, dichloromethane).  $^1\text{H}$  NMR (300 MHz,  $\text{CDCl}_3$ )  $\delta$  7.89-7.71 (m, 4H), 7.51 (td,  $J = 5.7, 2.3$  Hz, 4H), 7.38 (dd,  $J = 9.9, 6.8$  Hz, 4H), 6.23 (s, 2H), 3.95 (t,  $J = 9.0$  Hz, 1H), 3.65-3.46 (m, 3H), 1.48 (s, 9H), 1.29 (t,  $J = 7.2$  Hz, 3H), 1.11 (t,  $J = 7.1$  Hz, 3H).  $^{13}\text{C}$  NMR (75 MHz, DMSO)  $\delta$  168.36, 168.15, 162.54, 154.26, 132.96, 132.73, 131.91, 129.84, 129.29, 129.22, 128.07, 127.94, 127.74, 127.70, 126.94, 126.64, 119.07, 87.23, 85.09, 85.03, 80.48, 63.33, 53.53, 37.94, 28.34, 15.63, 13.52. HRMS (ESI) Calcd for  $\text{C}_{32}\text{H}_{33}\text{N}_3\text{O}_5\text{H}^+$   $[\text{M}+\text{H}]^+$  540.2493; Found: 540.2485.

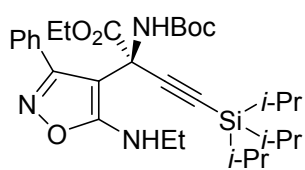

**Ethyl (*R*)-2-((*tert*-butoxycarbonyl)amino)-2-(5-(ethylamino)-3-phenylisoxazol-4-yl)-4-(triisopropylsilyl)but-3-ynoate (**3am**):** white solid, m.p.:119.3-123.4 °C, 54.7

mg, 96% yield, ee = 97%, HPLC conditions: Chiralpak OD-H (isopropyl alcohol/n-hexane: 1/99, 1.0 mL/min.,  $t_{\text{major}} = 5.632$  min.,  $t_{\text{minor}} = 6.082$  min.).  $[\alpha]_{\text{D}}^{20} = -81.1$  (c 1.0, dichloromethane).  $^1\text{H}$  NMR (300 MHz,  $\text{CDCl}_3$ )  $\delta$  7.47-7.40 (m, 2H), 7.40-7.30 (m, 3H), 6.32 (s, 1H), 6.24 (s, 1H), 3.86-3.70 (m, 1H), 3.61-3.40 (m, 2H), 3.35 (s, 1H), 1.43 (s, 9H), 1.32 (t,  $J = 7.2$  Hz, 3H), 1.04 (s, 21H), 1.00 (t,  $J = 7.2$  Hz, 3H).  $^{13}\text{C}$  NMR (75 MHz,  $\text{CDCl}_3$ )  $\delta$  168.48, 168.13, 162.48, 153.98, 129.80, 129.22, 129.03, 128.03, 101.95, 86.80, 85.97, 80.04, 63.06, 53.12, 37.93, 28.27, 18.48, 15.49, 13.37, 11.11. HRMS (ESI) Calcd for  $\text{C}_{31}\text{H}_{47}\text{N}_3\text{O}_5\text{SiH}^+$   $[\text{M}+\text{H}]^+$  570.3358; Found: 570.3346.

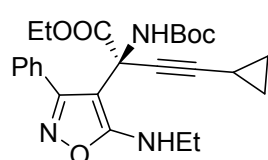

**Ethyl (S)-2-((*tert*-butoxycarbonyl)amino)-4-cyclopropyl-2-(5-(ethylamino)-3-phenylisoxazol-4-yl)but-3-ynoate (3an):**

light yellow solid, m.p.: 95.2-98.7 °C, 44.9 g, 99% yield, ee = 96%, HPLC conditions: Chiralpak AD-H (ethanol/n-hexane: 20/80, 1.0 mL/min.,  $t_{\text{major}} = 4.365$  min.,  $t_{\text{minor}} = 6.665$  min.).  $[\alpha]_{\text{D}}^{20} = -59.9$  (c 1.0, dichloromethane).  $^1\text{H}$  NMR (300 MHz,  $\text{CDCl}_3$ )  $\delta$  7.48-7.30 (m, 5H), 6.05 (s, 2H), 3.85 (dq,  $J = 14.1, 7.2$  Hz, 1H), 3.59 – 3.39 (m, 3H), 1.42 (s, 9H), 1.33 (t,  $J = 7.2$  Hz, 3H), 1.18 (dt,  $J = 8.2, 5.0$  Hz, 1H), 1.04 (t,  $J = 7.1$  Hz, 3H), 0.79-0.70 (m, 2H), 0.61 (dt,  $J = 5.0, 3.2$  Hz, 2H).  $^{13}\text{C}$  NMR (75 MHz,  $\text{CDCl}_3$ )  $\delta$  169.25, 168.99, 163.21, 154.86, 130.71, 129.94, 128.75, 89.45, 88.27, 80.92, 71.53, 63.82, 53.64, 38.70, 29.10, 16.37, 14.23, 8.87, 0.11. HRMS (ESI) Calcd for  $\text{C}_{25}\text{H}_{32}\text{N}_3\text{O}_5^+$   $[\text{M}+\text{H}]^+$  454.2366; Found: 454.2330.

### 3. Transformations of the products

#### 3.1 Iodocyclization of 3aa<sup>[4]</sup>

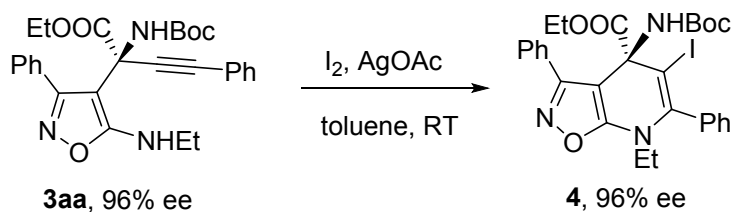

In a vial was charged with **3aa** (49 mg, 0.1 mmol, 1 equiv, 96% ee), AgOAc (3.34 mg, 0.1 mmol, 0.2 equiv) and dry toluene (1 mL). A solution of  $\text{I}_2$  (38 mg, 1.5 equiv.) dissolved in 0.5 mL of toluene was added dropwise. The reaction mixture was stirred at room temperature for 5 hours. The reaction mixture was then quenched with 10 mL of saturated aqueous  $\text{Na}_2\text{S}_2\text{O}_3$  solution and extracted three times with ethyl ether. The combined organic layers were combined and dried over anhydrous  $\text{Na}_2\text{SO}_4$ , filtered and evaporated under reduced pressure. The residue was purified by chromatography on silica gel using petroleum ether/EtOAc = 10/1 as eluent to afford compound **4** as a white solid (29 mg, 47% yield, 96% ee).

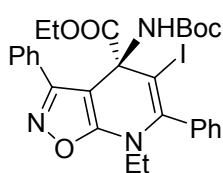

**Ethyl (S)-4-((*tert*-butoxycarbonyl)amino)-7-ethyl-5-iodo-3,6-diphenyl-4,7-dihydroisoxazolo[5,4-b]pyridine-4-carboxylate**

**(4):** white solid, m.p.: 138.5-140.7 °C, 47% yield, ee = 96%,

HPLC conditions: Chiralpak AD-H (isopropyl alcohol/n-hexane: 10/90, 1.0 mL/min.,  $t_{\text{major}} = 3.975$  min.,  $t_{\text{minor}} = 5.032$  min.).  $[\alpha]_{\text{D}}^{20} = -42.1$  (c 1.0, dichloromethane).  $^1\text{H}$  NMR (300 MHz, DMSO- $d_6$ )  $\delta$  7.55-7.50 (m, 8H), 7.33-7.20 (m, 2H), 6.43 (s, 1H), 4.00 (t,  $J = 7.1$  Hz, 2H), 3.50 (t,  $J = 7.3$  Hz, 2H), 1.37 (s, 9H), 1.03 (t,  $J = 7.0$  Hz, 3H), 0.90 (t,  $J = 7.2$  Hz, 3H).  $^{13}\text{C}$  NMR (75 MHz, DMSO)  $\delta$  169.39, 162.48, 160.58, 153.00, 142.36, 137.44, 130.14, 129.47, 129.25, 128.97, 128.71, 128.16, 128.09, 88.86, 79.12, 63.66, 62.95, 42.39, 28.22, 28.06, 14.47, 13.52.

### 3.2 Hydrogenation of alkyne moiety

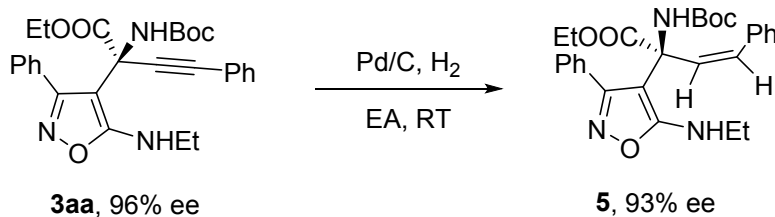

A solution of Pd/C (5wt%) and **3aa** (49 mg, 0.1 mmol, 1.0 equiv, 96% ee) in 1 mL of ethyl acetate was stirred at room temperature under hydrogen atmosphere using a balloon. The resulting mixture was filtered through celite pad and the pad was washed with ethyl acetate. After removal of the solvent, the mixture was purified by flash silica gel column chromatography using petroleum ether/EtOAc = 10/1 as eluent to give product **5** as a white solid (30 mg, 61% yield, 93% ee).

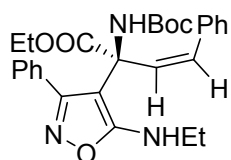

**Ethyl (S,Z)-2-((*tert*-butoxycarbonyl)amino)-2-(5-(ethylamino)-3-phenylisoxazol-4-yl)-4-phenylbut-3-enoate (5):** white solid,

m.p.: 95.4-100.1 °C, 61% yield, ee = 93%, HPLC conditions: Chiralpak AD-H (isopropyl alcohol/n-hexane: 5/95, 1.0 mL/min.,  $t_{\text{major}} = 6.357$  min.,  $t_{\text{minor}} = 7.792$  min.).  $[\alpha]_{\text{D}}^{20} = +46.1$  (c 1.0, dichloromethane).  $^1\text{H}$  NMR (400 MHz,

DMSO- $d_6$ )  $\delta$  7.45-7.36 (m, 5H), 7.29-7.19 (m, 3H), 7.16-7.11 (m, 2H), 6.46 (d,  $J$  = 12.6 Hz, 1H), 6.38 (d,  $J$  = 8.4 Hz, 1H), 6.07 (t,  $J$  = 6.0 Hz, 1H), 5.94 (d,  $J$  = 12.5 Hz, 1H), 3.70-3.62 (m, 1H), 3.53 (s, 1H), 3.28 (t,  $J$  = 7.2 Hz, 2H), 1.16 (s, 9H), 1.16 (t,  $J$  = 7.2 Hz, 3H), 0.97 (t,  $J$  = 7.1 Hz, 3H).  $^{13}\text{C}$  NMR (101 MHz, DMSO- $d_6$ )  $\delta$  170.26, 167.22, 162.64, 153.74, 135.97, 132.21, 130.78, 129.55, 129.52, 129.27, 128.41, 127.97, 127.50, 89.79, 79.07, 62.32, 59.19, 37.88, 28.31, 16.03, 13.86. HRMS (ESI) Calcd for  $\text{C}_{28}\text{H}_{33}\text{N}_3\text{O}_5\text{H}^+$   $[\text{M}+\text{H}]^+$  492.2493; Found: 492.2496.

### 3.3 Reduction of ester

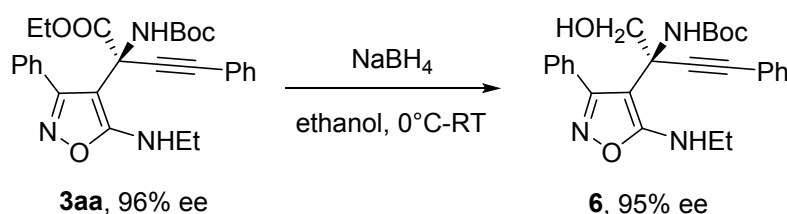

To a solution of  $\text{NaBH}_4$  (11 mg, 0.3 mmol) in ethanol (1 mL) was added **3aa** (49 mg, 0.1 mmol, 96% ee) at 0 °C and the reaction mixture was stirred and warmed up to room temperature. The resulting mixture was then quenched with saturated aqueous  $\text{NH}_4\text{Cl}$  solution and the organic layer was separated. The organic layer was dried over anhydrous  $\text{Na}_2\text{SO}_4$ , and evaporated under reduced pressure. Purification by silica-gel chromatography (Petroleum ether/ $\text{EtOAc}$  = 5/1) to gave the corresponding product **6** as a light yellow solid (31 mg, 69% yield, 95% ee).

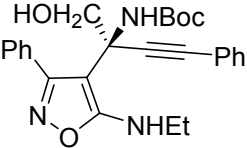
**tert-butyl (S)-(2-(5-(ethylamino)-3-phenylisoxazol-4-yl)-1-hydroxy-4-phenylbut-3-yn-2-yl)carbamate (6):** white solid, m.p.: 78.2–88.9 °C, 69% yield, ee = 95%, HPLC conditions: Chiralpak IC-H (isopropyl alcohol/n-hexane: 15/85, 1.0 mL/min.,  $t_{\text{major}}$  = 14.769 min.,  $t_{\text{minor}}$  = 11.000 min.).  $[\alpha]_{\text{D}}^{20}$  = -10.5 (c 1.0, dichloromethane).  $^1\text{H}$  NMR (300 MHz, DMSO- $d_6$ )  $\delta$  7.46 (dd,  $J$  = 6.9, 2.9 Hz, 2H), 7.38-7.31 (m, 3H), 7.30-7.22 (m, 3H), 7.01 (s, 2H), 6.66 (s, 1H), 6.22 (t,  $J$  = 5.9 Hz, 1H), 5.58 (d,  $J$  = 6.4 Hz, 1H), 3.70 (m,



2H), 3.35-3.25 (q, 7.1 Hz, 2H), 1.26 (s, 9H), 1.16 (t,  $J = 7.1$  Hz, 3H).  $^{13}\text{C}$  NMR (75 MHz, DMSO- $d_6$ )  $\delta$  166.13, 163.02, 153.70, 131.34, 131.23, 129.51, 129.17, 128.70, 128.53, 128.34, 127.64, 122.36, 89.77, 89.04, 83.59, 78.28, 67.80, 53.02, 37.44, 28.12, 15.67. HRMS (ESI) Calcd for  $\text{C}_{26}\text{H}_{30}\text{N}_3\text{O}_4^+$   $[\text{M}+\text{H}]^+$  448.2231; Found: 448.2229.

### 3.4 Click reaction<sup>[6]</sup>

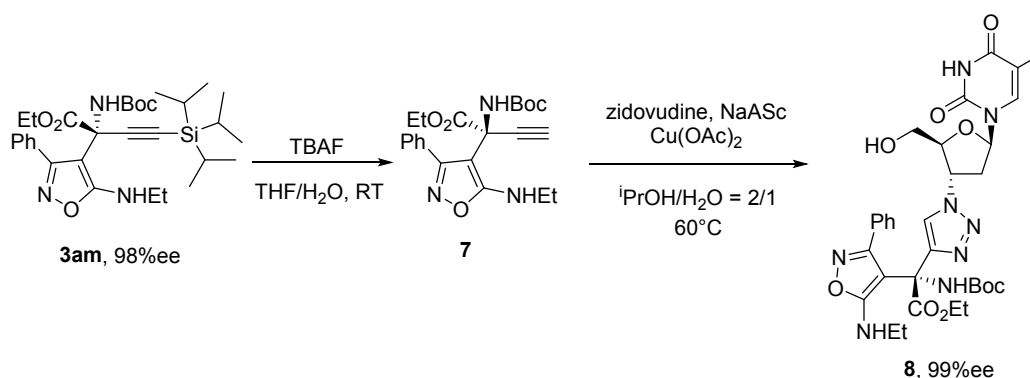

Compound **3am** (57 mg, 0.1 mmol, 1 equiv., 98% ee) was dissolved in 20/1 THF/H<sub>2</sub>O. Then tetrabutylammonium fluoride (TBAF, 31 mg, 0.12 mmol) was added and the solution stirred for 20 minutes at room temperature. Saturated aqueous NH<sub>4</sub>Cl solution was added and the solution extracted with ethyl acetate, dried over Na<sub>2</sub>SO<sub>4</sub>, and evaporated under reduced pressure. No purification is required to proceed to the next step. To a solution of the zidovudine (26.7 mg, 0.1 mmol) and compound **7** (43 mg, 0.1 mmol) in 1 mL *i*-PrOH/H<sub>2</sub>O = 2/1 was added Cu(OAc)<sub>2</sub> (10 mol%) and sodium ascorbate (20 mol%) at 60 °C. After completion, water was added and the product was extracted with ethyl acetate. The organic layers were combined and dried over anhydrous Na<sub>2</sub>SO<sub>4</sub>, and evaporated under reduced pressure. Purification by silica-gel chromatography (Petroleum ether/EtOAc = 1/1) to gave the corresponding product **8** as a white solid (55 mg, 81% yield, 99% ee).

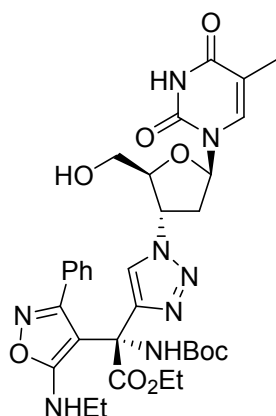

**Ethyl 2-((*tert*-butoxycarbonyl)amino)-2-(5-(ethylamino)-3-phenylisoxazol-4-yl)-2-(1-((2*S*,3*S*,5*R*)-2-(hydroxymethyl)-5-(5-methyl-2,4-dioxo-3,4-dihydropyrimidin-1(2H)-yl)**

**tetrahydrofuran-3-yl)-1H-1,2,3-triazol-4-yl)acetate (8):**

white solid, m.p.: 148.7-157.6 °C, 81% yield, ee = 99%, HPLC conditions: Chiralpak AY-H (isopropyl alcohol /n-hexane: 20/80, 1.0 mL/min.,  $t_{\text{major}} = 26.607$  min.,  $t_{\text{minor}} =$

41.206 min.).  $[\alpha]_{\text{D}}^{20} = -5.2$  (c 1.0, dichloromethane).  $^1\text{H}$  NMR (300 MHz, DMSO- $d_6$ )  $\delta$  11.34 (s, 1H), 8.07 (s, 1H), 7.87-7.68 (m, 1H), 7.47 (s, 1H), 7.37-7.08 (m, 5H), 6.34 (t,  $J = 6.6$  Hz, 1H), 6.03 (s, 1H), 5.35-5.20 (m, 1H), 5.19-4.93 (m, 1H), 3.93 (d,  $J = 4.5$  Hz, 1H), 3.89-3.71 (m, 2H), 3.71-3.59 (m, 1H), 3.58-3.45 (m, 1H), 3.32 (d,  $J = 9.1$  Hz, 2H), 2.48 (s, 2H), 1.81 (s, 3H), 1.30 (s, 9H), 1.16 (t,  $J = 7.1$  Hz, 3H), 1.06 (s, 3H).  $^{13}\text{C}$  NMR (75 MHz, DMSO- $d_6$ )  $\delta$  168.90, 167.15, 163.70, 162.61, 154.45, 150.41, 145.13, 136.17, 130.22, 128.80, 128.37, 127.43, 124.15, 109.61, 88.40, 84.24, 83.84, 79.07, 61.61, 60.69, 59.14, 57.80, 37.34, 36.90, 27.94, 15.44, 13.54, 12.19. HRMS (ESI) Calcd. for  $\text{C}_{32}\text{H}_{40}\text{N}_8\text{O}_9\text{Na}^+$   $[\text{M}+\text{Na}]^+$  703.2810; Found: 703.2836.

## References

- [1] H. Liu, Y. K. Yan, J. Y. Zhang, M. Liu, S. B. Cheng Z. Y. Wang and X. M. Zhang, *Chem. Commun.* 2020, **56**, 13591-13594.
- [2] H. Liu, Y. K. Yan, M. Li and X. M. Zhang, *Org. Biomol. Chem.* 2021, **19**, 3820-3824.
- [3] J. Yang, Z. Wang, Z. He, G. Li, L. Hong, W. Sun and R. Wang, *Angew. Chem. Int. Ed.* 2020, **59**, 642-647.
- [4] Z. W. Just and R. C. Larock, *J. Org. Chem.* 2008, **73**, 2662-2667.
- [5] A. Bubar, P. Estey, M. Lawson and S. Eisler, *J. Org. Chem.* 2012, **77**, 1572-1578.
- [6] B. H. M. Kuijpers, S. Groothuys, A. (Bram) R. Keereweer, P. J. L. M. Quaedflieg, R. H. Blaauw, F. L. van Delft and F. P. J. T. Rutjes, *Org. Lett.* 2004, **6**, 3123-3126.

#### 4. X-ray crystal structure of 3aa and 4

##### (a) X-ray crystal structure of 3aa

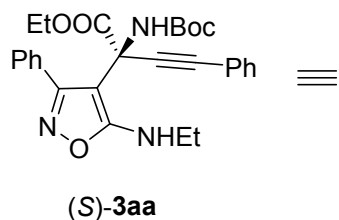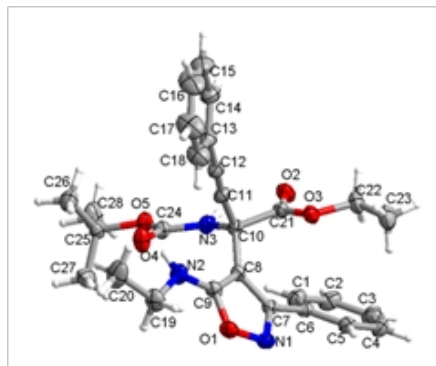

Table 1 Crystal data and structure refinement for 202012316.

|                              |                                                               |
|------------------------------|---------------------------------------------------------------|
| Identification code          | 202012316                                                     |
| Empirical formula            | C <sub>28</sub> H <sub>31</sub> N <sub>3</sub> O <sub>5</sub> |
| Formula weight               | 489.56                                                        |
| Temperature/K                | 293(2)                                                        |
| Crystal system               | orthorhombic                                                  |
| Space group                  | P212121                                                       |
| a/Å                          | 8.5012(5)                                                     |
| b/Å                          | 17.0320(7)                                                    |
| c/Å                          | 18.9074(10)                                                   |
| α /°                         | 90                                                            |
| β /°                         | 90                                                            |
| γ /°                         | 90                                                            |
| Volume/Å <sup>3</sup>        | 2737.7(2)                                                     |
| Z                            | 4                                                             |
| ρ calcg/cm <sup>3</sup>      | 1.188                                                         |
| μ /mm <sup>-1</sup>          | 0.669                                                         |
| F(000)                       | 1040.0                                                        |
| Crystal size/mm <sup>3</sup> | 0.17 × 0.12 × 0.1                                             |
| Radiation                    | CuKα (λ = 1.54184)                                            |

|                                                  |                                                             |
|--------------------------------------------------|-------------------------------------------------------------|
| 2 $\theta$ range for data collection/ $^{\circ}$ | 6.986 to 141.554                                            |
| Index ranges                                     | $-8 \leq h \leq 10, -20 \leq k \leq 10, -22 \leq l \leq 21$ |
| Reflections collected                            | 10617                                                       |
| Independent reflections                          | 5157 [Rint = 0.0324, Rsigma = 0.0440]                       |
| Data/restraints/parameters                       | 5157/5/355                                                  |
| Goodness-of-fit on F2                            | 1.015                                                       |
| Final R indexes [ $I \geq 2\sigma(I)$ ]          | R1 = 0.0486, wR2 = 0.1219                                   |
| Final R indexes [all data]                       | R1 = 0.0658, wR2 = 0.1393                                   |
| Largest diff. peak/hole / e $\text{\AA}^{-3}$    | 0.21/-0.14                                                  |
| Flack parameter                                  | -0.04(17)                                                   |

Table 2 Fractional Atomic Coordinates ( $\times 10^4$ ) and Equivalent Isotropic Displacement Parameters ( $\text{\AA}^2 \times 10^3$ ) for 202012316.  $U_{eq}$  is defined as 1/3 of the trace of the orthogonalised UIJ tensor.

| Atom | x       | y          | z          | U(eq)    |
|------|---------|------------|------------|----------|
| C1   | 6033(6) | 4838(2)    | 584(2)     | 71.8(10) |
| C2   | 6763(7) | 5338(3)    | 108(2)     | 87.6(14) |
| C3   | 7506(7) | 5042(3)    | -483(2)    | 90.8(14) |
| C4   | 7527(6) | 4251(3)    | -600(2)    | 81.6(12) |
| C5   | 6805(5) | 3746(2)    | -130(2)    | 70.8(10) |
| C6   | 6059(4) | 4035(2)    | 469.8(18)  | 59.4(8)  |
| C7   | 5281(4) | 3500(2)    | 971.3(19)  | 58.0(8)  |
| C8   | 5297(4) | 3494.4(19) | 1725.6(18) | 54.8(7)  |
| C9   | 4330(4) | 2883.1(19) | 1894(2)    | 62.0(8)  |
| C10  | 6290(4) | 3978.0(18) | 2231.7(17) | 53.9(7)  |
| C11  | 6803(5) | 3483(2)    | 2838.3(19) | 63.1(9)  |
| C12  | 7326(5) | 3060(2)    | 3273.9(19) | 67.9(9)  |
| C13  | 7923(6) | 2524(3)    | 3800(2)    | 77.1(11) |

|      |           |            |            |           |
|------|-----------|------------|------------|-----------|
| C14  | 9063(7)   | 2766(4)    | 4271(3)    | 99.3(16)  |
| C15  | 9614(10)  | 2243(5)    | 4785(4)    | 132(3)    |
| C16  | 9031(10)  | 1510(6)    | 4813(5)    | 158(4)    |
| C17  | 7941(10)  | 1263(5)    | 4350(5)    | 150(3)    |
| C18  | 7381(8)   | 1765(3)    | 3833(4)    | 112.5(19) |
| C19  | 2672(12)  | 1965(7)    | 2562(7)    | 92(3)     |
| C19A | 3160(50)  | 1860(30)   | 2670(40)   | 92(3)     |
| C20  | 2362(14)  | 1775(5)    | 3315(5)    | 133(4)    |
| C20A | 1460(50)  | 2080(20)   | 2880(20)   | 133(4)    |
| C21  | 7866(4)   | 4249(2)    | 1894(2)    | 62.7(9)   |
| C22  | 10016(11) | 3949(6)    | 1195(6)    | 87(2)     |
| C22A | 10331(15) | 3637(8)    | 1488(7)    | 87(2)     |
| C23  | 10532(15) | 3254(7)    | 785(6)     | 123(3)    |
| C23A | 10520(20) | 3928(11)   | 742(8)     | 123(3)    |
| C24  | 4260(5)   | 4716(2)    | 2893.7(19) | 61.1(8)   |
| C25  | 2479(5)   | 5653(2)    | 3468(2)    | 68.4(9)   |
| C26  | 2526(8)   | 5281(3)    | 4187(3)    | 102.8(16) |
| C27  | 1052(6)   | 5398(4)    | 3051(4)    | 115.7(19) |
| C28  | 2591(8)   | 6542(3)    | 3527(4)    | 117(2)    |
| N1   | 4409(4)   | 2935(2)    | 707.9(18)  | 75.4(9)   |
| N2   | 3853(5)   | 2578(2)    | 2514(2)    | 81.8(10)  |
| N3   | 5535(4)   | 4701.0(17) | 2468.7(17) | 62.2(7)   |
| O1   | 3786(3)   | 2531.9(15) | 1308.3(16) | 76.2(8)   |
| O2   | 8327(4)   | 4909.2(18) | 1939.0(19) | 88.2(9)   |
| O3   | 8599(3)   | 3659.6(18) | 1595.3(16) | 79.2(8)   |
| O4   | 3553(4)   | 4138.9(14) | 3088.1(19) | 88.4(10)  |
| O5   | 3913(3)   | 5460.9(13) | 3059.7(15) | 69.4(7)   |

Table 3 Anisotropic Displacement Parameters ( $\text{\AA}^2 \times 10^3$ ) for 202012316. The Anisotropic displacement factor exponent takes the form:

$-2\pi^2[h2a^*2U11+2hka^*b^*U12+\dots]$ .

| Atom | U11      | U22      | U33      | U23      | U13       | U12      |
|------|----------|----------|----------|----------|-----------|----------|
| C1   | 88(3)    | 66(2)    | 62(2)    | 2.2(17)  | -2.2(19)  | 11(2)    |
| C2   | 125(4)   | 63(2)    | 75(2)    | 11(2)    | -10(3)    | 1(3)     |
| C3   | 112(4)   | 96(3)    | 64(2)    | 18(2)    | -1(3)     | -12(3)   |
| C4   | 96(3)    | 92(3)    | 58(2)    | -1.3(19) | 4(2)      | 5(3)     |
| C5   | 76(3)    | 71(2)    | 64(2)    | -2.9(18) | -3.8(19)  | 2.8(19)  |
| C6   | 60(2)    | 62.3(18) | 56.0(18) | 1.0(15)  | -10.7(16) | 3.2(16)  |
| C7   | 54.6(18) | 56.0(18) | 63.3(19) | -4.0(15) | -6.0(15)  | 1.6(15)  |
| C8   | 52.5(16) | 48.4(15) | 63.5(19) | -4.7(14) | 1.6(15)   | 1.3(14)  |
| C9   | 61(2)    | 51.4(16) | 74(2)    | -4.6(16) | 6.7(18)   | -3.7(15) |
| C10  | 58.2(19) | 48.0(15) | 55.4(17) | -2.6(13) | 2.7(15)   | 0.9(14)  |
| C11  | 72(2)    | 58.9(18) | 58.6(19) | -5.9(16) | -0.1(17)  | 1.8(18)  |
| C12  | 78(2)    | 70(2)    | 56.3(19) | -1.2(17) | 1.5(18)   | 11.2(19) |
| C13  | 84(3)    | 83(3)    | 64(2)    | 8.8(19)  | 4(2)      | 20(2)    |
| C14  | 109(4)   | 115(4)   | 75(3)    | -4(3)    | -10(3)    | 24(3)    |
| C15  | 115(5)   | 182(7)   | 97(4)    | 21(4)    | -27(4)    | 16(5)    |
| C16  | 132(6)   | 188(8)   | 155(7)   | 95(7)    | -15(6)    | 28(6)    |
| C17  | 135(6)   | 131(6)   | 184(8)   | 83(6)    | -20(6)    | -6(5)    |
| C18  | 108(4)   | 95(4)    | 134(5)   | 36(3)    | -10(4)    | 2(3)     |
| C19  | 99(7)    | 67(4)    | 111(6)   | 9(4)     | 15(6)     | -19(5)   |
| C19A | 99(7)    | 67(4)    | 111(6)   | 9(4)     | 15(6)     | -19(5)   |
| C20  | 178(9)   | 97(5)    | 125(7)   | 5(4)     | 49(7)     | -50(6)   |
| C20A | 178(9)   | 97(5)    | 125(7)   | 5(4)     | 49(7)     | -50(6)   |
| C21  | 53.6(19) | 69(2)    | 65(2)    | -6.0(17) | -3.7(16)  | -4.9(16) |
| C22  | 66(4)    | 94(6)    | 102(7)   | 13(4)    | 20(4)     | 13(4)    |
| C22A | 66(4)    | 94(6)    | 102(7)   | 13(4)    | 20(4)     | 13(4)    |
| C23  | 93(5)    | 150(8)   | 125(6)   | 23(7)    | 34(5)     | 28(7)    |
| C23A | 93(5)    | 150(8)   | 125(6)   | 23(7)    | 34(5)     | 28(7)    |

|     |          |          |          |           |          |           |
|-----|----------|----------|----------|-----------|----------|-----------|
| C24 | 66(2)    | 49.2(17) | 68(2)    | -4.0(15)  | 5.3(17)  | 1.9(16)   |
| C25 | 64(2)    | 63(2)    | 79(2)    | -8.4(17)  | 7.8(19)  | 3.7(17)   |
| C26 | 113(4)   | 114(4)   | 81(3)    | 1(3)      | 20(3)    | 15(4)     |
| C27 | 74(3)    | 146(5)   | 127(4)   | -32(4)    | -9(3)    | 13(3)     |
| C28 | 120(4)   | 70(3)    | 163(6)   | -21(3)    | 46(4)    | 13(3)     |
| N1  | 73(2)    | 78(2)    | 74(2)    | -6.5(16)  | -9.1(17) | -12.6(18) |
| N2  | 99(3)    | 63.9(18) | 82(2)    | -8.4(17)  | 20(2)    | -25.0(19) |
| N3  | 69.4(19) | 47.3(14) | 70.0(17) | -4.2(13)  | 12.0(16) | -2.4(14)  |
| O1  | 72.2(16) | 66.8(14) | 89.6(18) | -11.1(14) | -1.4(15) | -20.2(13) |
| O2  | 73.0(18) | 82.7(19) | 109(2)   | -16.2(17) | 8.6(17)  | -29.2(15) |
| O3  | 57.5(14) | 91.8(19) | 88.3(18) | -14.9(15) | 11.4(14) | -0.9(14)  |
| O4  | 97(2)    | 51.5(14) | 117(2)   | -4.1(15)  | 43(2)    | -6.2(14)  |
| O5  | 76.0(17) | 48.2(11) | 83.9(16) | -7.4(12)  | 18.2(14) | 1.2(11)   |

Table 4 Bond Lengths for 202012316.

| Atom | Atom | Length/Å | Atom | Atom | Length/Å  |
|------|------|----------|------|------|-----------|
| C1   | C2   | 1.386(6) | C15  | C16  | 1.344(11) |
| C1   | C6   | 1.383(5) | C16  | C17  | 1.342(12) |
| C2   | C3   | 1.380(7) | C17  | C18  | 1.383(8)  |
| C3   | C4   | 1.365(7) | C19  | C20  | 1.484(15) |
| C4   | C5   | 1.381(6) | C19  | N2   | 1.452(12) |
| C5   | C6   | 1.389(5) | C19A | C20A | 1.54(3)   |
| C6   | C7   | 1.473(5) | C19A | N2   | 1.38(6)   |
| C7   | C8   | 1.426(5) | C21  | O2   | 1.195(5)  |
| C7   | N1   | 1.312(5) | C21  | O3   | 1.309(5)  |
| C8   | C9   | 1.364(5) | C22  | C23  | 1.480(14) |
| C8   | C10  | 1.518(5) | C22  | O3   | 1.506(10) |
| C9   | N2   | 1.344(5) | C22A | C23A | 1.503(17) |
| C9   | O1   | 1.341(5) | C22A | O3   | 1.486(12) |

|     |     |          |     |     |          |
|-----|-----|----------|-----|-----|----------|
| C10 | C11 | 1.489(5) | C24 | N3  | 1.350(5) |
| C10 | C21 | 1.555(5) | C24 | O4  | 1.209(4) |
| C10 | N3  | 1.459(4) | C24 | O5  | 1.340(4) |
| C11 | C12 | 1.181(5) | C25 | C26 | 1.501(6) |
| C12 | C13 | 1.443(5) | C25 | C27 | 1.511(7) |
| C13 | C14 | 1.378(7) | C25 | C28 | 1.520(6) |
| C13 | C18 | 1.374(7) | C25 | O5  | 1.479(5) |
| C14 | C15 | 1.400(9) | N1  | O1  | 1.429(4) |

Table 5 Bond Angles for 202012316.

| Atom | Atom | Atom | Angle/°  | Atom | Atom | Atom | Angle/°   |
|------|------|------|----------|------|------|------|-----------|
| C6   | C1   | C2   | 119.9(4) | C16  | C15  | C14  | 119.7(7)  |
| C3   | C2   | C1   | 120.5(4) | C17  | C16  | C15  | 121.3(7)  |
| C4   | C3   | C2   | 119.8(4) | C16  | C17  | C18  | 120.4(8)  |
| C3   | C4   | C5   | 120.3(4) | C13  | C18  | C17  | 119.8(7)  |
| C4   | C5   | C6   | 120.5(4) | N2   | C19  | C20  | 109.8(9)  |
| C1   | C6   | C5   | 119.0(4) | N2   | C19A | C20A | 104(3)    |
| C1   | C6   | C7   | 120.3(3) | O2   | C21  | C10  | 122.2(3)  |
| C5   | C6   | C7   | 120.7(3) | O2   | C21  | O3   | 126.6(4)  |
| C8   | C7   | C6   | 130.1(3) | O3   | C21  | C10  | 111.1(3)  |
| N1   | C7   | C6   | 117.6(3) | C23  | C22  | O3   | 103.8(8)  |
| N1   | C7   | C8   | 112.3(3) | O3   | C22A | C23A | 103.0(11) |
| C7   | C8   | C10  | 129.2(3) | O4   | C24  | N3   | 124.4(3)  |
| C9   | C8   | C7   | 103.5(3) | O4   | C24  | O5   | 126.1(3)  |
| C9   | C8   | C10  | 127.0(3) | O5   | C24  | N3   | 109.5(3)  |
| N2   | C9   | C8   | 132.9(4) | C26  | C25  | C27  | 111.9(5)  |
| O1   | C9   | C8   | 110.8(3) | C26  | C25  | C28  | 110.6(4)  |
| O1   | C9   | N2   | 116.3(3) | C27  | C25  | C28  | 112.0(5)  |
| C8   | C10  | C21  | 112.4(3) | O5   | C25  | C26  | 110.9(4)  |
| C11  | C10  | C8   | 109.9(3) | O5   | C25  | C27  | 109.0(3)  |



|     |     |     |          |     |     |      |          |
|-----|-----|-----|----------|-----|-----|------|----------|
| C11 | C10 | C21 | 103.4(3) | O5  | C25 | C28  | 102.0(4) |
| N3  | C10 | C8  | 114.0(3) | C7  | N1  | O1   | 105.1(3) |
| N3  | C10 | C11 | 111.8(3) | C9  | N2  | C19  | 122.8(6) |
| N3  | C10 | C21 | 104.8(3) | C9  | N2  | C19A | 131(3)   |
| C12 | C11 | C10 | 173.2(4) | C24 | N3  | C10  | 123.5(3) |
| C11 | C12 | C13 | 178.1(5) | C9  | O1  | N1   | 108.3(3) |
| C14 | C13 | C12 | 120.2(5) | C21 | O3  | C22  | 110.3(5) |
| C18 | C13 | C12 | 120.5(5) | C21 | O3  | C22A | 123.4(6) |
| C18 | C13 | C14 | 119.3(5) | C24 | O5  | C25  | 120.9(3) |
| C13 | C14 | C15 | 119.5(6) |     |     |      |          |

Table 6 Hydrogen Bonds for 202012316.

| D    | H    | A   | d(D-H)/Å | d(H-A)/Å | d(D-A)/Å  | D-H-A/° |
|------|------|-----|----------|----------|-----------|---------|
| C1   | H1   | N3  | 0.93     | 2.87     | 3.596(5)  | 135.4   |
| C4   | H4   | O11 | 0.93     | 2.83     | 3.488(5)  | 128.3   |
| C5   | H5   | O11 | 0.93     | 2.94     | 3.541(5)  | 123.4   |
| C20  | H20C | O22 | 0.96     | 2.57     | 3.267(8)  | 129.2   |
| C22A | H22C | O13 | 0.97     | 2.81     | 3.506(12) | 129.6   |
| C23  | H23B | N13 | 0.96     | 2.51     | 3.343(12) | 144.8   |
| C28  | H28A | O14 | 0.96     | 2.74     | 3.525(7)  | 140.0   |
| N2   | H2A  | O4  | 0.85(2)  | 2.20(3)  | 2.882(4)  | 138(3)  |
| N3   | H3A  | O2  | 0.86(2)  | 2.15(4)  | 2.601(4)  | 112(3)  |

11/2+X,1/2-Y,-Z; 21-X,-1/2+Y,1/2-Z; 31+X,+Y,+Z; 41-X,1/2+Y,1/2-Z

Table 7 Torsion Angles for 202012316.

| A  | B  | C  | D  | Angle/°  | A   | B   | C   | D    | Angle/°   |
|----|----|----|----|----------|-----|-----|-----|------|-----------|
| C1 | C2 | C3 | C4 | -0.2(8)  | C10 | C21 | O3  | C22A | -154.6(7) |
| C1 | C6 | C7 | C8 | -44.2(6) | C11 | C10 | C21 | O2   | -108.3(4) |
| C1 | C6 | C7 | N1 | 134.9(4) | C11 | C10 | C21 | O3   | 69.0(4)   |
| C2 | C1 | C6 | C5 | -0.9(6)  | C11 | C10 | N3  | C24  | -57.5(5)  |

|     |     |     |      |           |      |      |     |      |           |
|-----|-----|-----|------|-----------|------|------|-----|------|-----------|
| C2  | C1  | C6  | C7   | -179.8(4) | C12  | C13  | C14 | C15  | 179.1(5)  |
| C2  | C3  | C4  | C5   | 0.2(8)    | C12  | C13  | C18 | C17  | -178.6(6) |
| C3  | C4  | C5  | C6   | -0.5(7)   | C13  | C14  | C15 | C16  | 0.2(11)   |
| C4  | C5  | C6  | C1   | 0.8(6)    | C14  | C13  | C18 | C17  | 2.3(10)   |
| C4  | C5  | C6  | C7   | 179.7(4)  | C14  | C15  | C16 | C17  | 1.0(14)   |
| C5  | C6  | C7  | C8   | 136.9(4)  | C15  | C16  | C17 | C18  | -0.5(15)  |
| C5  | C6  | C7  | N1   | -44.0(5)  | C16  | C17  | C18 | C13  | -1.2(13)  |
| C6  | C1  | C2  | C3   | 0.6(8)    | C18  | C13  | C14 | C15  | -1.9(8)   |
| C6  | C7  | C8  | C9   | 178.1(4)  | C20  | C19  | N2  | C9   | -178.0(7) |
| C6  | C7  | C8  | C10  | -8.6(6)   | C20A | C19A | N2  | C9   | -110(4)   |
| C6  | C7  | N1  | O1   | -178.6(3) | C21  | C10  | N3  | C24  | -168.8(3) |
| C7  | C8  | C9  | N2   | -179.5(4) | C23  | C22  | O3  | C21  | -169.8(7) |
| C7  | C8  | C9  | O1   | 1.0(4)    | C23A | C22A | O3  | C21  | -95.6(12) |
| C7  | C8  | C10 | C11  | -140.4(4) | C26  | C25  | O5  | C24  | 62.0(5)   |
| C7  | C8  | C10 | C21  | -25.8(5)  | C27  | C25  | O5  | C24  | -61.7(5)  |
| C7  | C8  | C10 | N3   | 93.2(4)   | C28  | C25  | O5  | C24  | 179.8(4)  |
| C7  | N1  | O1  | C9   | 0.0(4)    | N1   | C7   | C8  | C9   | -1.1(4)   |
| C8  | C7  | N1  | O1   | 0.7(4)    | N1   | C7   | C8  | C10  | 172.2(3)  |
| C8  | C9  | N2  | C19  | 173.4(6)  | N2   | C9   | O1  | N1   | 179.8(4)  |
| C8  | C9  | N2  | C19A | -164(2)   | N3   | C10  | C21 | O2   | 8.8(5)    |
| C8  | C9  | O1  | N1   | -0.7(4)   | N3   | C10  | C21 | O3   | -173.8(3) |
| C8  | C10 | C21 | O2   | 133.2(4)  | N3   | C24  | O5  | C25  | 174.4(3)  |
| C8  | C10 | C21 | O3   | -49.5(4)  | O1   | C9   | N2  | C19  | -7.1(8)   |
| C8  | C10 | N3  | C24  | 68.0(5)   | O1   | C9   | N2  | C19A | 16(2)     |
| C9  | C8  | C10 | C11  | 31.5(5)   | O2   | C21  | O3  | C22  | -9.8(7)   |
| C9  | C8  | C10 | C21  | 146.0(4)  | O2   | C21  | O3  | C22A | 22.5(9)   |
| C9  | C8  | C10 | N3   | -94.9(4)  | O4   | C24  | N3  | C10  | -4.6(6)   |
| C10 | C8  | C9  | N2   | 7.0(7)    | O4   | C24  | O5  | C25  | -5.5(6)   |
| C10 | C8  | C9  | O1   | -172.5(3) | O5   | C24  | N3  | C10  | 175.5(3)  |

Table 8 Hydrogen Atom Coordinates ( $\text{\AA}\times 10^4$ ) and Isotropic Displacement Parameters ( $\text{\AA}^2\times 10^3$ ) for 202012316.

| Atom | x     | y    | z    | U(eq) |
|------|-------|------|------|-------|
| H1   | 5526  | 5041 | 980  | 86    |
| H2   | 6752  | 5877 | 189  | 105   |
| H3   | 7991  | 5381 | -802 | 109   |
| H4   | 8030  | 4052 | -998 | 98    |
| H5   | 6819  | 3208 | -215 | 85    |
| H14  | 9463  | 3274 | 4246 | 119   |
| H15  | 10380 | 2401 | 5106 | 158   |
| H16  | 9389  | 1167 | 5160 | 190   |
| H17  | 7560  | 752  | 4377 | 180   |
| H18  | 6640  | 1589 | 3507 | 135   |
| H19A | 3037  | 1499 | 2317 | 110   |
| H19B | 1707  | 2139 | 2337 | 110   |
| H19C | 3699  | 1610 | 3063 | 110   |
| H19D | 3173  | 1518 | 2267 | 110   |
| H20A | 2034  | 2241 | 3559 | 200   |
| H20B | 3304  | 1574 | 3529 | 200   |
| H20C | 1546  | 1386 | 3344 | 200   |
| H20D | 1468  | 2382 | 3310 | 200   |
| H20E | 856   | 1612 | 2949 | 200   |
| H20F | 991   | 2389 | 2510 | 200   |
| H22A | 9738  | 4379 | 883  | 105   |
| H22B | 10834 | 4122 | 1516 | 105   |
| H22C | 10735 | 3108 | 1539 | 105   |
| H22D | 10866 | 3979 | 1821 | 105   |

|      |          |          |          |        |
|------|----------|----------|----------|--------|
| H23A | 10529    | 2800     | 1086     | 184    |
| H23B | 11576    | 3341     | 608      | 184    |
| H23C | 9826     | 3171     | 396      | 184    |
| H23D | 11578    | 4105     | 672      | 184    |
| H23E | 9804     | 4355     | 661      | 184    |
| H23F | 10291    | 3509     | 418      | 184    |
| H26A | 2394     | 4724     | 4142     | 154    |
| H26B | 1694     | 5491     | 4473     | 154    |
| H26C | 3521     | 5390     | 4407     | 154    |
| H27A | 1086     | 5629     | 2588     | 174    |
| H27B | 115      | 5566     | 3290     | 174    |
| H27C | 1047     | 4836     | 3009     | 174    |
| H28A | 3497     | 6680     | 3803     | 176    |
| H28B | 1661     | 6741     | 3752     | 176    |
| H28C | 2685     | 6765     | 3062     | 176    |
| H2A  | 3960(50) | 2890(20) | 2861(16) | 62(11) |
| H3A  | 6060(50) | 5129(18) | 2410(20) | 77(13) |

---

Table 9 Atomic Occupancy for 202012316.

| Atom | Occupancy | Atom | Occupancy | Atom | Occupancy |
|------|-----------|------|-----------|------|-----------|
| C19  | 0.807(12) | H19A | 0.807(12) | H19B | 0.807(12) |
| C19A | 0.193(12) | H19C | 0.193(12) | H19D | 0.193(12) |
| C20  | 0.807(12) | H20A | 0.807(12) | H20B | 0.807(12) |
| H20C | 0.807(12) | C20A | 0.193(12) | H20D | 0.193(12) |
| H20E | 0.193(12) | H20F | 0.193(12) | C22  | 0.571(7)  |
| H22A | 0.571(7)  | H22B | 0.571(7)  | C22A | 0.429(7)  |
| H22C | 0.429(7)  | H22D | 0.429(7)  | C23  | 0.571(7)  |
| H23A | 0.571(7)  | H23B | 0.571(7)  | H23C | 0.571(7)  |
| C23A | 0.429(7)  | H23D | 0.429(7)  | H23E | 0.429(7)  |

**(b) X-ray crystal structure of 4**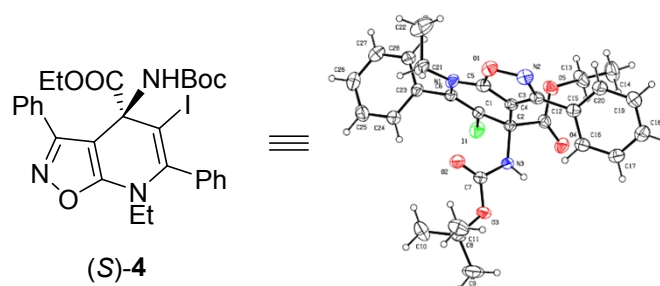

Table 1 Crystal data and structure refinement for 210410\_s1\_lm.

|                              |                                                                |
|------------------------------|----------------------------------------------------------------|
| Identification code          | 210410_s1_lm                                                   |
| Empirical formula            | C <sub>28</sub> H <sub>30</sub> IN <sub>3</sub> O <sub>5</sub> |
| Formula weight               | 615.45                                                         |
| Temperature/K                | 293.15                                                         |
| Crystal system               | monoclinic                                                     |
| Space group                  | P21/c                                                          |
| a/Å                          | 18.330(2)                                                      |
| b/Å                          | 10.0441(6)                                                     |
| c/Å                          | 16.8467(17)                                                    |
| $\alpha$ /°                  | 90                                                             |
| $\beta$ /°                   | 116.711(13)                                                    |
| $\gamma$ /°                  | 90                                                             |
| Volume/Å <sup>3</sup>        | 2770.6(5)                                                      |
| Z                            | 4                                                              |
| $\rho$ calcg/cm <sup>3</sup> | 1.475                                                          |
| $\mu$ /mm <sup>-1</sup>      | 1.197                                                          |
| F(000)                       | 1248.0                                                         |
| Crystal size/mm <sup>3</sup> | 0.35 × 0.3 × 0.25                                              |
| Radiation                    | MoK $\alpha$ ( $\lambda$ = 0.71073)                            |

|                                                  |                                                              |
|--------------------------------------------------|--------------------------------------------------------------|
| 2 $\theta$ range for data collection/ $^{\circ}$ | 6.036 to 52.742                                              |
| Index ranges                                     | $-22 \leq h \leq 22, -10 \leq k \leq 12, -16 \leq l \leq 21$ |
| Reflections collected                            | 14402                                                        |
| Independent reflections                          | 5654 [Rint = 0.0273, Rsigma = 0.0407]                        |
| Data/restraints/parameters                       | 5654/0/339                                                   |
| Goodness-of-fit on F2                            | 1.036                                                        |
| Final R indexes [ $I \geq 2\sigma(I)$ ]          | R1 = 0.0463, wR2 = 0.1124                                    |
| Final R indexes [all data]                       | R1 = 0.0686, wR2 = 0.1283                                    |
| Largest diff. peak/hole / e $\text{\AA}^{-3}$    | 1.22/-1.22                                                   |

Table 2 Fractional Atomic Coordinates ( $\times 10^4$ ) and Equivalent Isotropic Displacement Parameters ( $\text{\AA}^2 \times 10^3$ ) for 210410\_s1\_lm. Ueq is defined as 1/3 of the trace of the orthogonalised UIJ tensor.

| Atom | x          | y          | z          | U(eq)     |
|------|------------|------------|------------|-----------|
| I1   | 2954.7(2)  | 12367.2(3) | 3361.7(2)  | 59.22(14) |
| O1   | 3630.7(17) | 7838(3)    | 5976.4(18) | 54.0(7)   |
| O2   | 2293.2(17) | 11107(3)   | 5517.9(18) | 62.6(8)   |
| O3   | 1007.3(16) | 11716(3)   | 4548.3(19) | 57.4(8)   |
| O4   | 1506.9(17) | 9636(3)    | 2515.5(18) | 57.2(8)   |
| O5   | 2760.7(17) | 8751(3)    | 3058.4(18) | 53.8(7)   |
| N1   | 3961.7(18) | 10003(4)   | 5757(2)    | 46.4(8)   |
| N2   | 3012(2)    | 6879(4)    | 5494(2)    | 54.9(9)   |
| N3   | 1727.1(19) | 10556(3)   | 4057(2)    | 45.4(8)   |
| C1   | 3142(2)    | 10916(4)   | 4325(2)    | 40.1(8)   |
| C2   | 2451(2)    | 9924(4)    | 4069(2)    | 38.2(8)   |
| C3   | 2769(2)    | 8805(4)    | 4719(2)    | 38.4(8)   |
| C4   | 2519(2)    | 7480(4)    | 4757(3)    | 42.6(9)   |
| C5   | 3456(2)    | 8942(4)    | 5485(2)    | 43.8(9)   |

|     |         |          |         |          |
|-----|---------|----------|---------|----------|
| C6  | 3788(2) | 11018(4) | 5125(2) | 40.6(8)  |
| C7  | 1734(2) | 11129(4) | 4787(3) | 47.9(10) |
| C8  | 836(3)  | 12411(4) | 5217(3) | 61.0(13) |
| C9  | -44(3)  | 12859(7) | 4650(4) | 97(2)    |
| C10 | 1396(4) | 13577(5) | 5593(4) | 84.6(17) |
| C11 | 878(4)  | 11435(6) | 5915(4) | 84.4(16) |
| C12 | 2168(2) | 9419(4)  | 3111(2) | 42.2(9)  |
| C13 | 2611(3) | 8244(5)  | 2191(3) | 67.6(13) |
| C14 | 2327(4) | 6871(6)  | 2069(4) | 83.7(16) |
| C15 | 1820(2) | 6722(4)  | 4103(3) | 44.7(9)  |
| C16 | 1059(3) | 7311(4)  | 3647(4) | 63.1(13) |
| C17 | 416(3)  | 6590(5)  | 3042(4) | 86.0(18) |
| C18 | 513(3)  | 5291(5)  | 2881(4) | 82.6(17) |
| C19 | 1258(3) | 4705(5)  | 3320(4) | 76.8(15) |
| C20 | 1912(3) | 5411(4)  | 3926(3) | 61.2(12) |
| C21 | 4563(2) | 10114(5) | 6698(3) | 58.7(12) |
| C22 | 5347(3) | 9372(7)  | 6879(4) | 107(2)   |
| C23 | 4350(2) | 12168(4) | 5418(3) | 43.7(9)  |
| C24 | 4101(3) | 13335(4) | 5657(3) | 55.9(11) |
| C25 | 4615(3) | 14408(5) | 5937(3) | 63.6(13) |
| C26 | 5382(3) | 14331(5) | 5989(3) | 64.3(13) |
| C27 | 5633(3) | 13182(5) | 5747(3) | 62.1(12) |
| C28 | 5120(2) | 12100(4) | 5464(3) | 51.9(10) |

Table 3 Anisotropic Displacement Parameters ( $\text{\AA}^2 \times 10^3$ ) for 210410\_s1\_lm. The Anisotropic displacement factor exponent takes the form:  $-2\pi^2[h^2a^*2U_{11}+2hka^*b^*U_{12}+\dots]$ .

| Atom | U11     | U22     | U33     | U23      | U13       | U12       |
|------|---------|---------|---------|----------|-----------|-----------|
| Il   | 60.6(2) | 52.1(2) | 49.9(2) | 7.49(13) | 11.50(15) | -1.67(13) |

|     |          |          |          |           |          |          |
|-----|----------|----------|----------|-----------|----------|----------|
| O1  | 53.1(17) | 66.9(18) | 36.3(15) | 12.2(14)  | 14.9(13) | 5.1(15)  |
| O2  | 47.5(17) | 91(2)    | 40.5(16) | -15.1(16) | 11.9(14) | 16.9(16) |
| O3  | 45.0(15) | 71(2)    | 51.4(17) | -14.4(15) | 17.3(13) | 17.9(15) |
| O4  | 48.7(16) | 74(2)    | 36.3(15) | -5.3(14)  | 7.8(13)  | 3.1(15)  |
| O5  | 62.7(18) | 62.5(18) | 40.7(15) | -7.1(14)  | 27.1(14) | 12.0(14) |
| N1  | 36.3(17) | 62(2)    | 33.0(17) | -1.0(16)  | 8.8(14)  | 2.2(15)  |
| N2  | 57(2)    | 60(2)    | 50(2)    | 10.4(19)  | 26.1(18) | 3.0(18)  |
| N3  | 32.7(16) | 56.2(19) | 39.5(18) | -10.2(15) | 9.3(14)  | 8.4(15)  |
| C1  | 37.7(19) | 42(2)    | 36(2)    | -2.5(16)  | 12.3(16) | 4.0(16)  |
| C2  | 33.6(18) | 46(2)    | 33.2(19) | -3.4(16)  | 13.9(16) | 6.0(16)  |
| C3  | 38.9(19) | 45(2)    | 32.2(19) | 0.4(16)   | 16.4(16) | 8.6(16)  |
| C4  | 45(2)    | 52(2)    | 39(2)    | 4.0(18)   | 25.7(18) | 9.0(17)  |
| C5  | 46(2)    | 55(2)    | 33(2)    | 6.1(18)   | 19.8(17) | 9.5(19)  |
| C6  | 34.6(19) | 49(2)    | 38(2)    | -4.1(17)  | 15.9(16) | 5.3(16)  |
| C7  | 40(2)    | 52(2)    | 51(2)    | -7(2)     | 19.2(19) | 7.1(18)  |
| C8  | 58(3)    | 66(3)    | 59(3)    | -9(2)     | 27(2)    | 21(2)    |
| C9  | 71(4)    | 121(5)   | 97(5)    | -5(4)     | 37(3)    | 47(3)    |
| C10 | 109(4)   | 65(3)    | 87(4)    | -26(3)    | 51(4)    | -5(3)    |
| C11 | 97(4)    | 85(4)    | 90(4)    | 5(3)      | 59(4)    | 19(3)    |
| C12 | 48(2)    | 43(2)    | 37(2)    | -2.5(17)  | 19.6(19) | 1.1(17)  |
| C13 | 94(4)    | 74(3)    | 48(3)    | -12(2)    | 43(3)    | 8(3)     |
| C14 | 104(4)   | 87(4)    | 65(3)    | -27(3)    | 42(3)    | -18(3)   |
| C15 | 46(2)    | 49(2)    | 45(2)    | 3.0(19)   | 26.0(18) | 1.6(19)  |
| C16 | 50(3)    | 53(3)    | 85(4)    | -11(2)    | 29(3)    | 4(2)     |
| C17 | 47(3)    | 68(3)    | 119(5)   | -22(3)    | 17(3)    | 8(2)     |
| C18 | 53(3)    | 68(3)    | 108(4)   | -19(3)    | 20(3)    | -7(3)    |
| C19 | 71(3)    | 52(3)    | 97(4)    | -15(3)    | 28(3)    | 2(2)     |
| C20 | 53(3)    | 51(3)    | 70(3)    | -1(2)     | 19(2)    | 5(2)     |
| C21 | 48(2)    | 88(3)    | 29(2)    | 1(2)      | 7.4(18)  | 1(2)     |



|     |       |        |       |          |          |         |
|-----|-------|--------|-------|----------|----------|---------|
| C22 | 69(4) | 153(6) | 77(4) | 28(4)    | 14(3)    | 16(4)   |
| C23 | 36(2) | 54(2)  | 35(2) | -5.8(18) | 10.6(16) | 1.6(17) |
| C24 | 47(2) | 63(3)  | 53(3) | -11(2)   | 18(2)    | 4(2)    |
| C25 | 72(3) | 56(3)  | 50(3) | -11(2)   | 15(2)    | 6(2)    |
| C26 | 66(3) | 61(3)  | 50(3) | -3(2)    | 13(2)    | -15(2)  |
| C27 | 43(2) | 75(3)  | 62(3) | 4(3)     | 18(2)    | -6(2)   |
| C28 | 45(2) | 57(2)  | 49(2) | -3(2)    | 16.1(19) | 6(2)    |

---

Table 4 Bond Lengths for 210410\_s1\_lm.

| Atom | Atom | Length/Å | Atom | Atom | Length/Å |
|------|------|----------|------|------|----------|
| I1   | C1   | 2.092(4) | C3   | C5   | 1.346(5) |
| O1   | N2   | 1.430(5) | C4   | C15  | 1.471(6) |
| O1   | C5   | 1.334(5) | C6   | C23  | 1.477(5) |
| O2   | C7   | 1.197(4) | C8   | C9   | 1.526(7) |
| O3   | C7   | 1.343(4) | C8   | C10  | 1.498(7) |
| O3   | C8   | 1.474(5) | C8   | C11  | 1.505(7) |
| O4   | C12  | 1.195(4) | C13  | C14  | 1.455(8) |
| O5   | C12  | 1.313(4) | C15  | C16  | 1.387(6) |
| O5   | C13  | 1.453(5) | C15  | C20  | 1.377(6) |
| N1   | C5   | 1.350(5) | C16  | C17  | 1.368(7) |
| N1   | C6   | 1.403(5) | C17  | C18  | 1.360(7) |
| N1   | C21  | 1.472(5) | C18  | C19  | 1.360(7) |
| N2   | C4   | 1.310(5) | C19  | C20  | 1.372(6) |
| N3   | C2   | 1.462(5) | C21  | C22  | 1.523(7) |
| N3   | C7   | 1.354(5) | C23  | C24  | 1.382(6) |
| C1   | C2   | 1.513(5) | C23  | C28  | 1.379(6) |
| C1   | C6   | 1.340(5) | C24  | C25  | 1.369(6) |
| C2   | C3   | 1.493(5) | C25  | C26  | 1.370(7) |
| C2   | C12  | 1.542(5) | C26  | C27  | 1.370(7) |

|    |    |          |     |     |          |
|----|----|----------|-----|-----|----------|
| C3 | C4 | 1.418(5) | C27 | C28 | 1.375(6) |
|----|----|----------|-----|-----|----------|

Table 5 Bond Angles for 210410\_s1\_lm.

| Atom | Atom | Atom | Angle/°  | Atom | Atom | Atom | Angle/°  |
|------|------|------|----------|------|------|------|----------|
| C5   | O1   | N2   | 107.4(3) | O2   | C7   | N3   | 125.5(4) |
| C7   | O3   | C8   | 120.2(3) | O3   | C7   | N3   | 108.2(3) |
| C12  | O5   | C13  | 117.3(3) | O3   | C8   | C9   | 100.9(4) |
| C5   | N1   | C6   | 115.4(3) | O3   | C8   | C10  | 110.6(4) |
| C5   | N1   | C21  | 119.5(3) | O3   | C8   | C11  | 109.6(4) |
| C6   | N1   | C21  | 124.5(3) | C10  | C8   | C9   | 111.4(4) |
| C4   | N2   | O1   | 105.2(3) | C10  | C8   | C11  | 113.2(5) |
| C7   | N3   | C2   | 122.3(3) | C11  | C8   | C9   | 110.5(5) |
| C2   | C1   | I1   | 114.4(2) | O4   | C12  | O5   | 126.4(4) |
| C6   | C1   | I1   | 119.3(3) | O4   | C12  | C2   | 123.8(4) |
| C6   | C1   | C2   | 125.8(3) | O5   | C12  | C2   | 109.8(3) |
| N3   | C2   | C1   | 110.9(3) | O5   | C13  | C14  | 111.6(4) |
| N3   | C2   | C3   | 112.9(3) | C16  | C15  | C4   | 121.0(4) |
| N3   | C2   | C12  | 104.6(3) | C20  | C15  | C4   | 120.5(4) |
| C1   | C2   | C12  | 111.1(3) | C20  | C15  | C16  | 118.6(4) |
| C3   | C2   | C1   | 106.6(3) | C17  | C16  | C15  | 120.1(4) |
| C3   | C2   | C12  | 110.9(3) | C18  | C17  | C16  | 120.7(5) |
| C4   | C3   | C2   | 135.4(3) | C17  | C18  | C19  | 119.7(5) |
| C5   | C3   | C2   | 121.0(3) | C18  | C19  | C20  | 120.6(5) |
| C5   | C3   | C4   | 103.6(3) | C19  | C20  | C15  | 120.3(4) |
| N2   | C4   | C3   | 112.1(4) | N1   | C21  | C22  | 111.2(4) |
| N2   | C4   | C15  | 118.0(4) | C24  | C23  | C6   | 119.2(4) |
| C3   | C4   | C15  | 129.9(3) | C28  | C23  | C6   | 121.5(4) |
| O1   | C5   | N1   | 120.6(3) | C28  | C23  | C24  | 119.3(4) |

|    |    |     |          |     |     |     |          |
|----|----|-----|----------|-----|-----|-----|----------|
| O1 | C5 | C3  | 111.7(4) | C25 | C24 | C23 | 120.1(4) |
| C3 | C5 | N1  | 127.6(4) | C24 | C25 | C26 | 120.4(4) |
| N1 | C6 | C23 | 115.3(3) | C27 | C26 | C25 | 120.0(4) |
| C1 | C6 | N1  | 120.3(4) | C26 | C27 | C28 | 120.0(4) |
| C1 | C6 | C23 | 124.3(4) | C27 | C28 | C23 | 120.2(4) |
| O2 | C7 | O3  | 126.3(4) |     |     |     |          |

Table 6 Torsion Angles for 210410\_s1\_lm.

| A  | B  | C   | D   | Angle/°   | A  | B   | C   | D   | Angle/°   |
|----|----|-----|-----|-----------|----|-----|-----|-----|-----------|
| I1 | C1 | C2  | N3  | -70.0(3)  | C5 | N1  | C6  | C23 | -178.9(3) |
| I1 | C1 | C2  | C3  | 166.8(2)  | C5 | N1  | C21 | C22 | 86.1(5)   |
| I1 | C1 | C2  | C12 | 45.9(4)   | C5 | C3  | C4  | N2  | 0.9(4)    |
| I1 | C1 | C6  | N1  | -175.0(3) | C5 | C3  | C4  | C15 | -178.1(4) |
| I1 | C1 | C6  | C23 | 6.1(5)    | C6 | N1  | C5  | O1  | 170.0(3)  |
| O1 | N2 | C4  | C3  | -0.5(4)   | C6 | N1  | C5  | C3  | -7.0(6)   |
| O1 | N2 | C4  | C15 | 178.6(3)  | C6 | N1  | C21 | C22 | -103.1(5) |
| N1 | C6 | C23 | C24 | -103.0(4) | C6 | C1  | C2  | N3  | 102.1(4)  |
| N1 | C6 | C23 | C28 | 76.5(5)   | C6 | C1  | C2  | C3  | -21.2(5)  |
| N2 | O1 | C5  | N1  | -176.8(3) | C6 | C1  | C2  | C12 | -142.1(4) |
| N2 | O1 | C5  | C3  | 0.7(4)    | C6 | C23 | C24 | C25 | 179.5(4)  |
| N2 | C4 | C15 | C16 | 139.2(4)  | C6 | C23 | C28 | C27 | -179.4(4) |
| N2 | C4 | C15 | C20 | -41.2(6)  | C7 | O3  | C8  | C9  | -178.4(4) |
| N3 | C2 | C3  | C4  | 74.0(5)   | C7 | O3  | C8  | C10 | 63.6(5)   |
| N3 | C2 | C3  | C5  | -106.3(4) | C7 | O3  | C8  | C11 | -61.9(6)  |
| N3 | C2 | C12 | O4  | 5.1(5)    | C7 | N3  | C2  | C1  | -60.1(5)  |
| N3 | C2 | C12 | O5  | -175.9(3) | C7 | N3  | C2  | C3  | 59.5(5)   |
| C1 | C2 | C3  | C4  | -164.1(4) | C7 | N3  | C2  | C12 | -179.9(4) |
| C1 | C2 | C3  | C5  | 15.7(4)   | C8 | O3  | C7  | O2  | -0.6(7)   |
| C1 | C2 | C12 | O4  | -114.5(4) | C8 | O3  | C7  | N3  | 179.2(4)  |

|    |     |     |     |           |     |     |     |     |           |
|----|-----|-----|-----|-----------|-----|-----|-----|-----|-----------|
| C1 | C2  | C12 | O5  | 64.4(4)   | C12 | O5  | C13 | C14 | -94.8(5)  |
| C1 | C6  | C23 | C24 | 76.0(5)   | C12 | C2  | C3  | C4  | -43.0(6)  |
| C1 | C6  | C23 | C28 | -104.5(5) | C12 | C2  | C3  | C5  | 136.7(4)  |
| C2 | N3  | C7  | O2  | -5.4(7)   | C13 | O5  | C12 | O4  | 1.2(6)    |
| C2 | N3  | C7  | O3  | 174.8(3)  | C13 | O5  | C12 | C2  | -177.7(3) |
| C2 | C1  | C6  | N1  | 13.4(6)   | C15 | C16 | C17 | C18 | 0.3(9)    |
| C2 | C1  | C6  | C23 | -165.5(3) | C16 | C15 | C20 | C19 | -0.9(7)   |
| C2 | C3  | C4  | N2  | -179.3(4) | C16 | C17 | C18 | C19 | -0.6(10)  |
| C2 | C3  | C4  | C15 | 1.7(7)    | C17 | C18 | C19 | C20 | 0.2(10)   |
| C2 | C3  | C5  | O1  | 179.3(3)  | C18 | C19 | C20 | C15 | 0.6(8)    |
| C2 | C3  | C5  | N1  | -3.5(6)   | C20 | C15 | C16 | C17 | 0.4(8)    |
| C3 | C2  | C12 | O4  | 127.1(4)  | C21 | N1  | C5  | O1  | -18.4(5)  |
| C3 | C2  | C12 | O5  | -53.9(4)  | C21 | N1  | C5  | C3  | 164.6(4)  |
| C3 | C4  | C15 | C16 | -41.8(6)  | C21 | N1  | C6  | C1  | -169.0(4) |
| C3 | C4  | C15 | C20 | 137.8(4)  | C21 | N1  | C6  | C23 | 10.0(5)   |
| C4 | C3  | C5  | O1  | -0.9(4)   | C23 | C24 | C25 | C26 | -0.6(7)   |
| C4 | C3  | C5  | N1  | 176.3(4)  | C24 | C23 | C28 | C27 | 0.1(6)    |
| C4 | C15 | C16 | C17 | -180.0(5) | C24 | C25 | C26 | C27 | 1.2(7)    |
| C4 | C15 | C20 | C19 | 179.5(4)  | C25 | C26 | C27 | C28 | -1.0(7)   |
| C5 | O1  | N2  | C4  | -0.1(4)   | C26 | C27 | C28 | C23 | 0.4(7)    |
| C5 | N1  | C6  | C1  | 2.1(5)    | C28 | C23 | C24 | C25 | 0.0(6)    |

Table 7 Hydrogen Atom Coordinates ( $\text{\AA}\times 104$ ) and Isotropic Displacement Parameters ( $\text{\AA}^2\times 103$ ) for 210410\_s1\_lm.

| Atom | x       | y        | z       | U(eq) |
|------|---------|----------|---------|-------|
| H3   | 1281.59 | 10563.51 | 3568.34 | 54    |
| H9A  | -61.12  | 13473.19 | 4205.43 | 145   |
| H9B  | -246.28 | 13286.15 | 5021.02 | 145   |
| H9C  | -376.56 | 12098.18 | 4367.19 | 145   |

|      |         |          |         |     |
|------|---------|----------|---------|-----|
| H10A | 1948.93 | 13267.35 | 5910.17 | 127 |
| H10B | 1248.29 | 14057.34 | 5992.19 | 127 |
| H10C | 1350.89 | 14153.84 | 5118.97 | 127 |
| H11A | 525.52  | 10693.57 | 5633.74 | 127 |
| H11B | 706.61  | 11864.62 | 6311.78 | 127 |
| H11C | 1429.36 | 11124.68 | 6243.54 | 127 |
| H13A | 3110.3  | 8295.05  | 2127.79 | 81  |
| H13B | 2203.8  | 8794.92  | 1732.74 | 81  |
| H14A | 2252.44 | 6557.18  | 1499.54 | 125 |
| H14B | 1816.71 | 6825.07  | 2099.49 | 125 |
| H14C | 2723.75 | 6326.07  | 2528.23 | 125 |
| H16  | 984.55  | 8197.21  | 3753.58 | 76  |
| H17  | -92.05  | 6992.1   | 2736.55 | 103 |
| H18  | 71.73   | 4805.75  | 2472.24 | 99  |
| H19  | 1324.29 | 3817.55  | 3209.21 | 92  |
| H20  | 2419.46 | 5002.8   | 4218.05 | 73  |
| H21A | 4332.46 | 9750     | 7068.72 | 70  |
| H21B | 4686.92 | 11045.65 | 6851.37 | 70  |
| H22A | 5519.62 | 9609.39  | 6437.11 | 160 |
| H22B | 5250.64 | 8430.71  | 6856.69 | 160 |
| H22C | 5765.57 | 9609.83  | 7456.72 | 160 |
| H24  | 3582.86 | 13390.73 | 5628.74 | 67  |
| H25  | 4443.13 | 15194.28 | 6091.74 | 76  |
| H26  | 5732.37 | 15057.74 | 6190    | 77  |
| H27  | 6150.11 | 13135    | 5773.66 | 75  |
| H28  | 5291.77 | 11319.82 | 5302.3  | 62  |

---

## 5. $^1\text{H}$ NMR and $^{13}\text{C}$ NMR spectra

### Ethyl (*E*)-2-((*tert*-butoxycarbonyl)imino)-4-phenylbut-3-ynoate (2a)

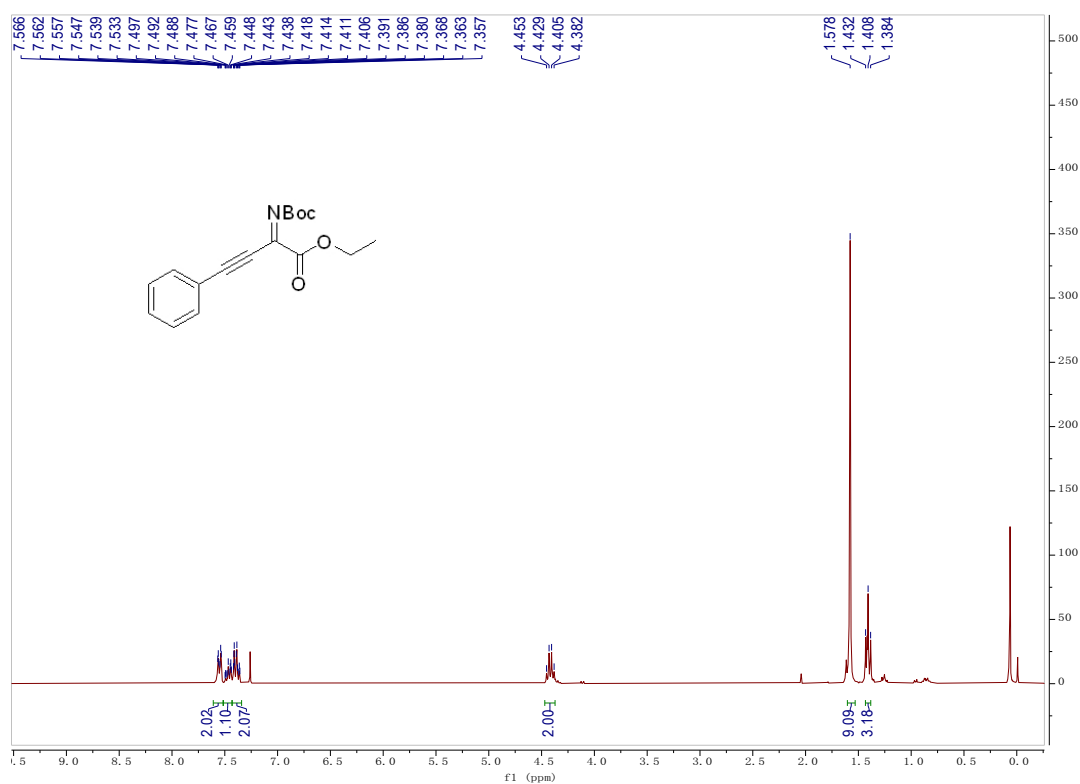

### Ethyl (*E*)-2-((*tert*-butoxycarbonyl)imino)-4-(4-methoxyphenyl)but-3-ynoate (2b)

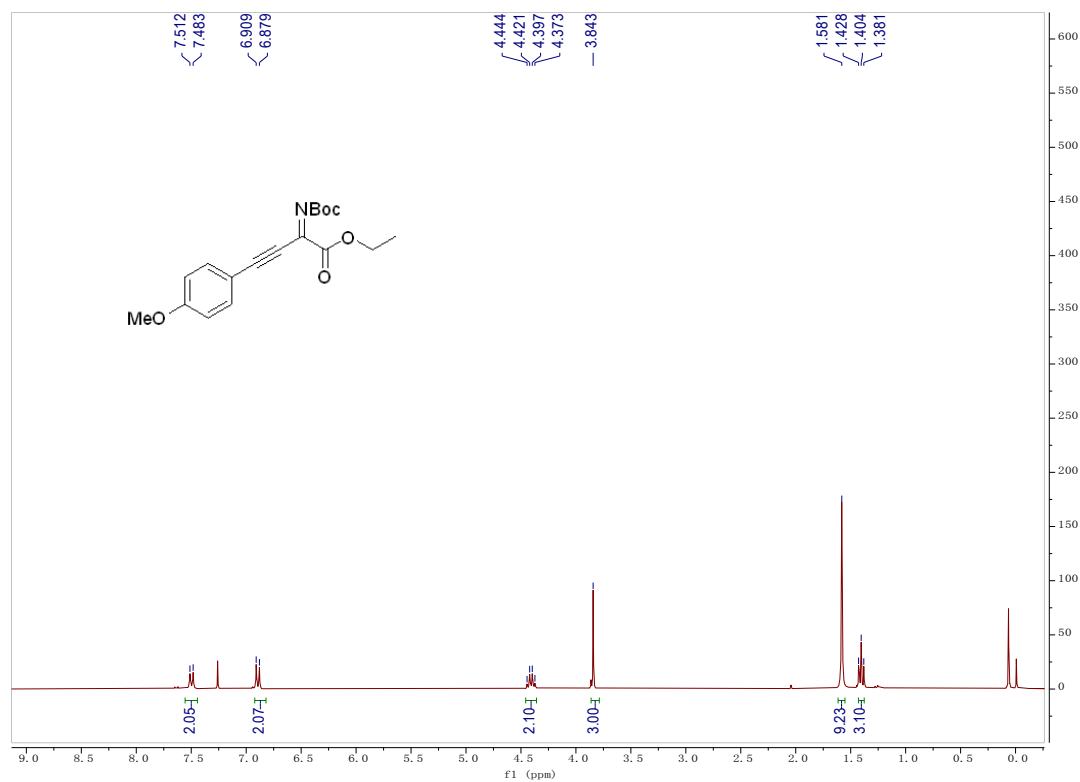

### Ethyl (*E*)-2-((*tert*-butoxycarbonyl)imino)-4-(*m*-tolyl)but-3-ynoate (**2c**)

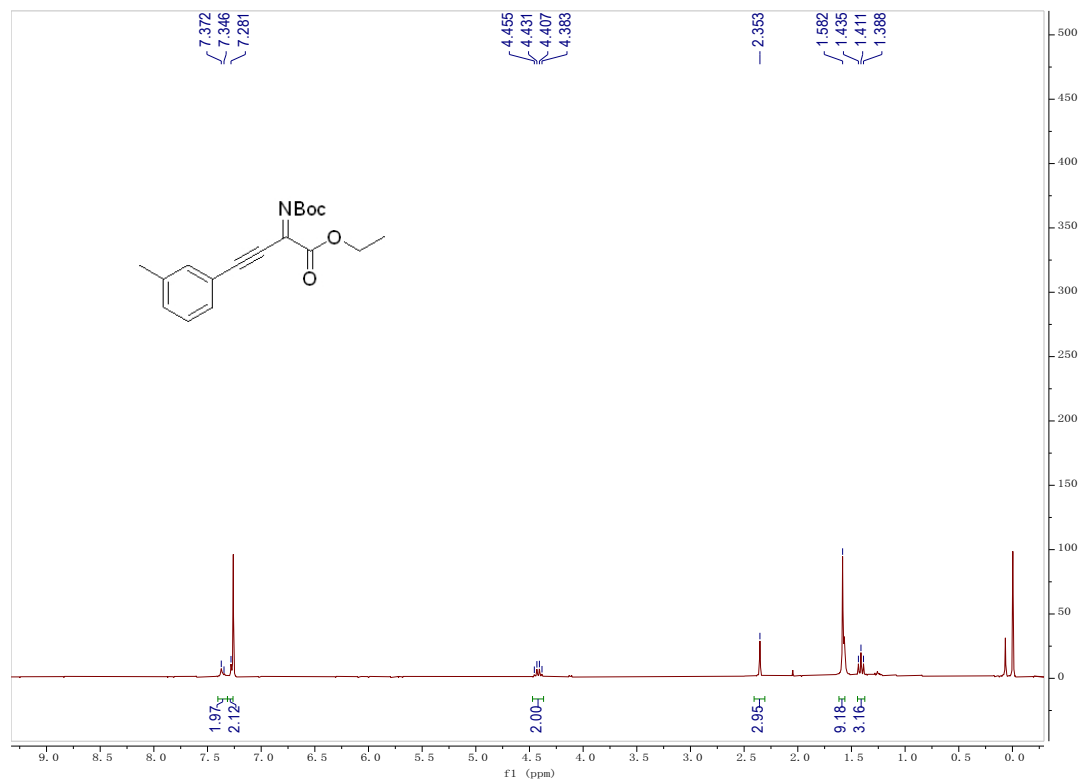

### Ethyl (*E*)-2-((*tert*-butoxycarbonyl)imino)-4-(*p*-tolyl)but-3-ynoate (**2d**)

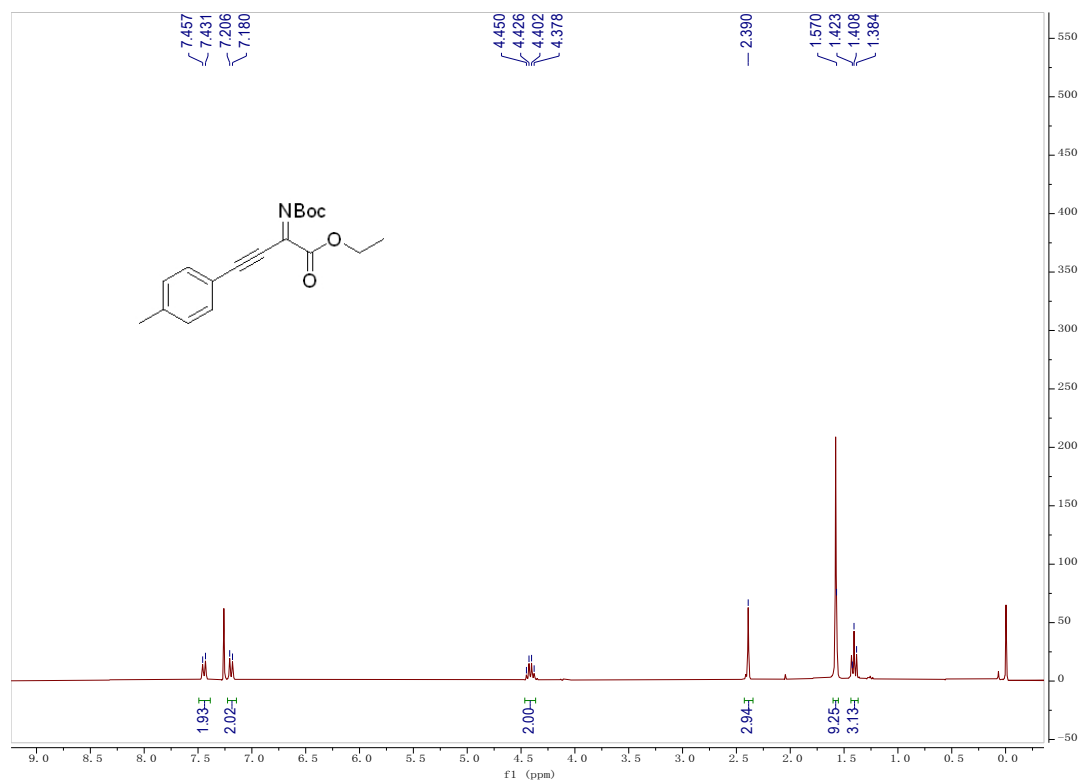

**Ethyl (*E*)-2-((*tert*-butoxycarbonyl)imino)-4-(2-chlorophenyl)but-3-ynoate (2e)**

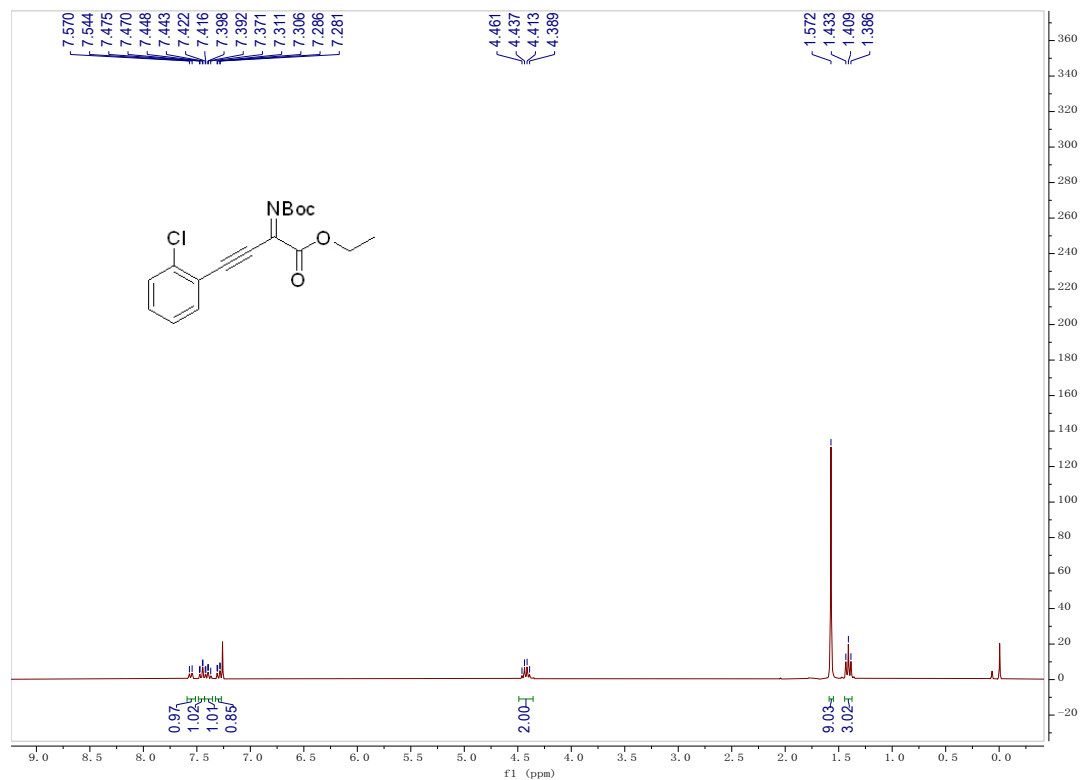

**Ethyl (*E*)-2-((*tert*-butoxycarbonyl)imino)-4-(3-chlorophenyl)but-3-ynoate (2f)**

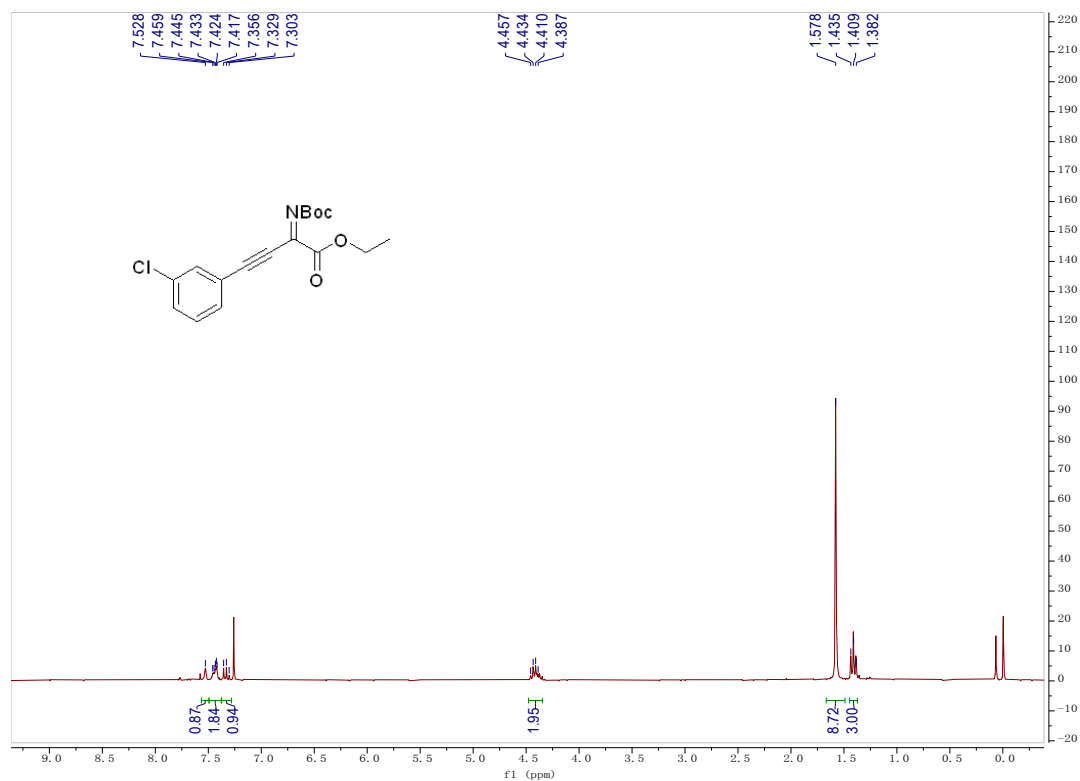



**Ethyl (*E*)-2-((*tert*-butoxycarbonyl)imino)-4-(4-chlorophenyl)but-3-ynoate (2g)**

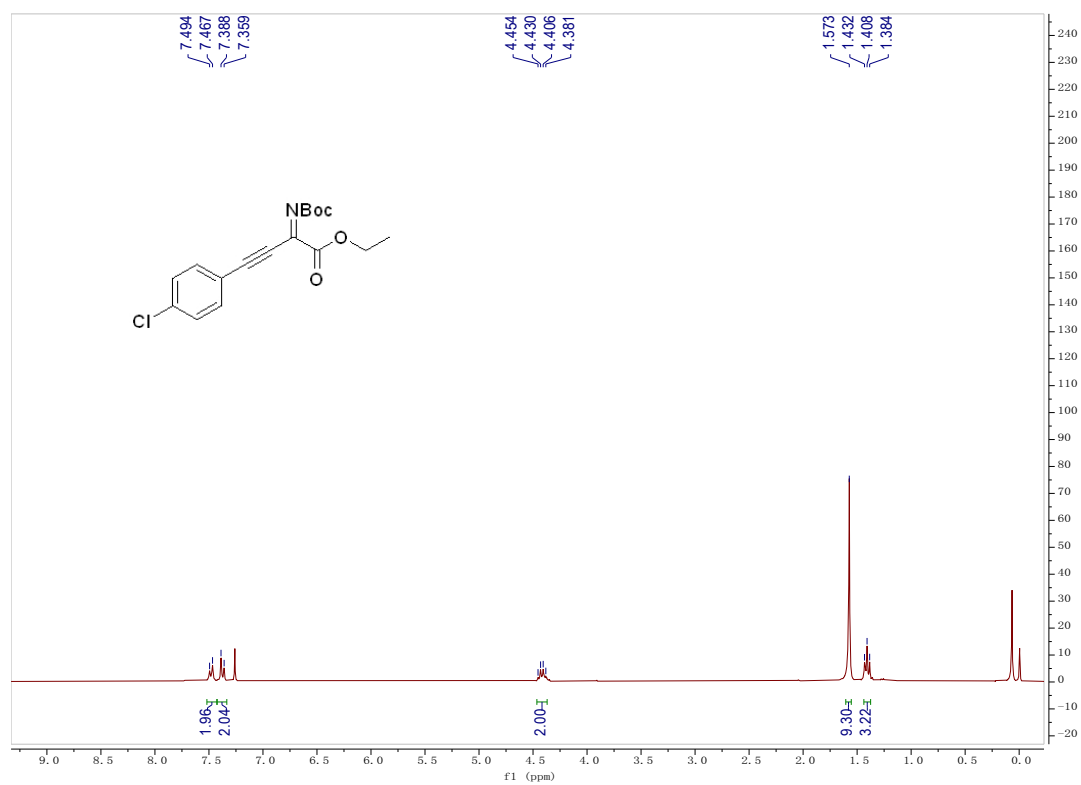

**Ethyl (*E*)-4-(4-bromophenyl)-2-((*tert*-butoxycarbonyl)imino)but-3-ynoate (2h)**

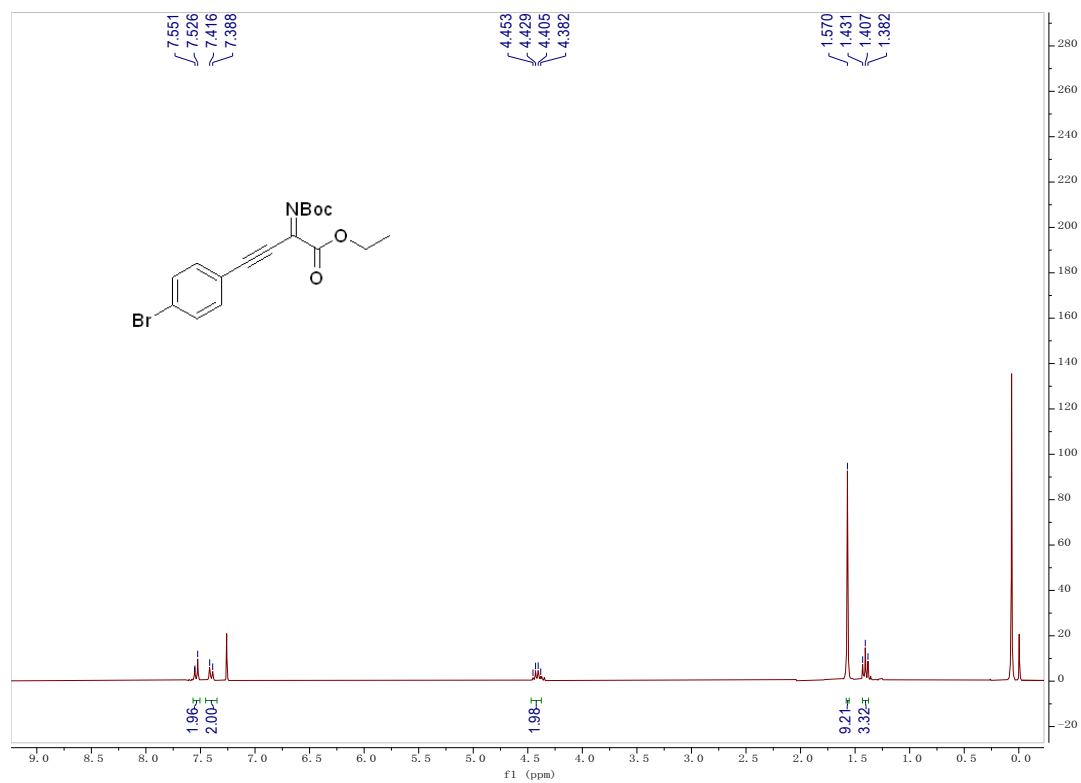

**Ethyl (E)-2-((tert-butoxycarbonyl)imino)-4-(4-fluorophenyl)but-3-ynoate (2i)**

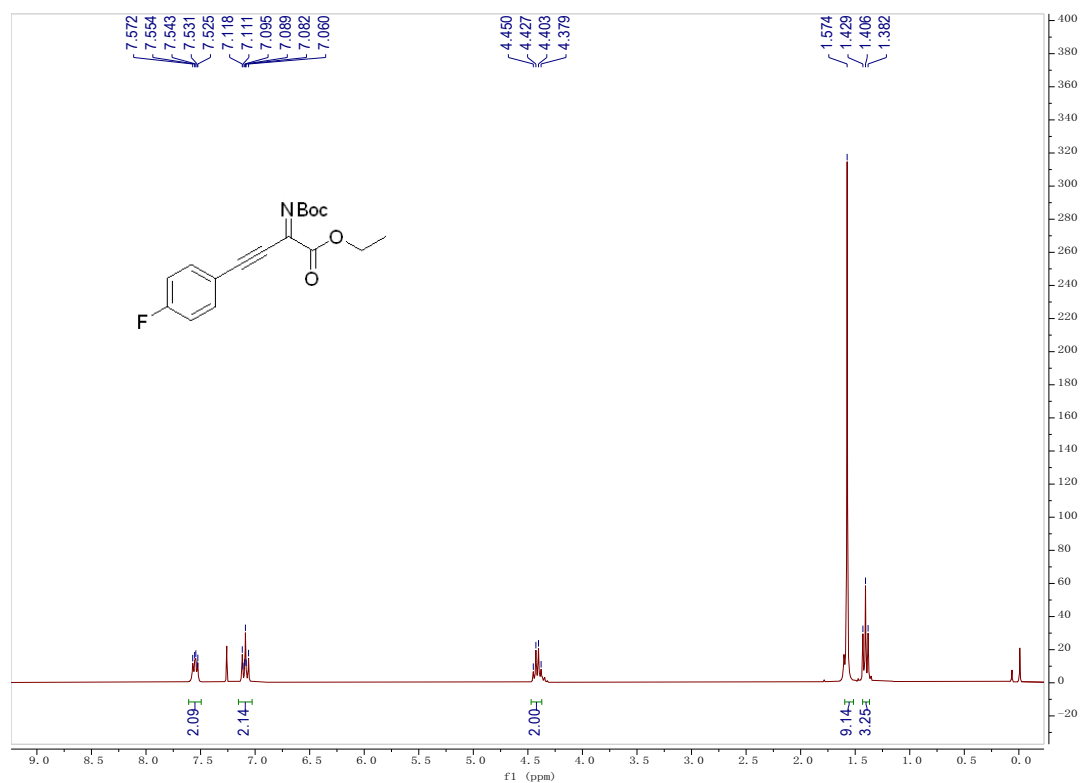

**Ethyl (E)-2-((tert-butoxycarbonyl)imino)-4-(4-(trifluoromethyl)phenyl)but-3-ynoate (2j)**

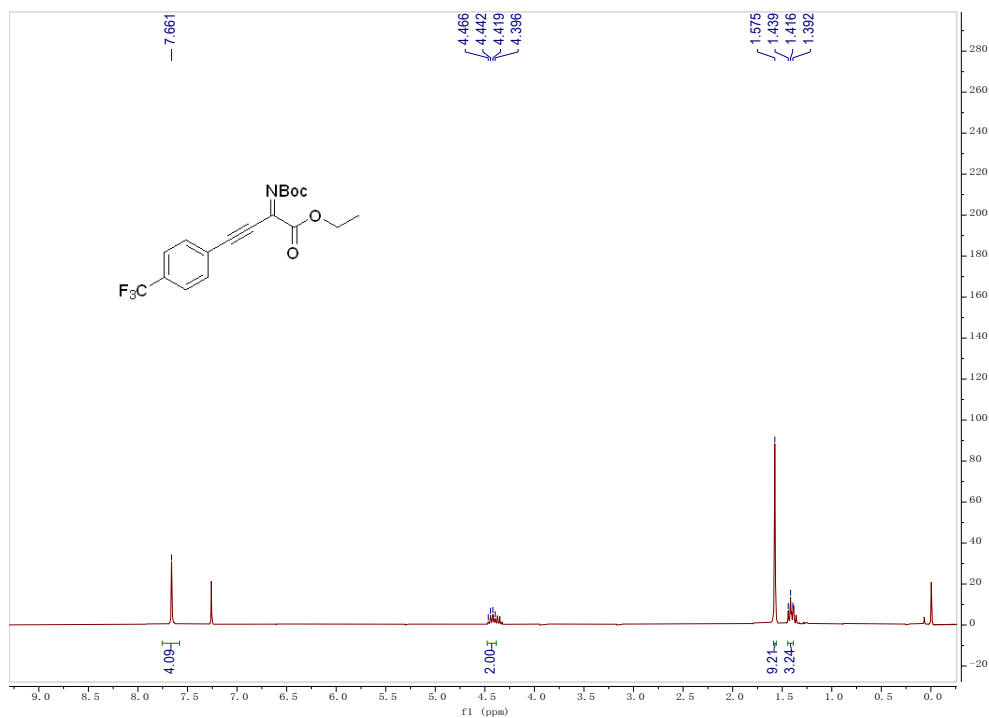

**Ethyl (*E*)-2-((*tert*-butoxycarbonyl)imino)-4-(thiophen-2-yl)but-3-ynoate (2k)**

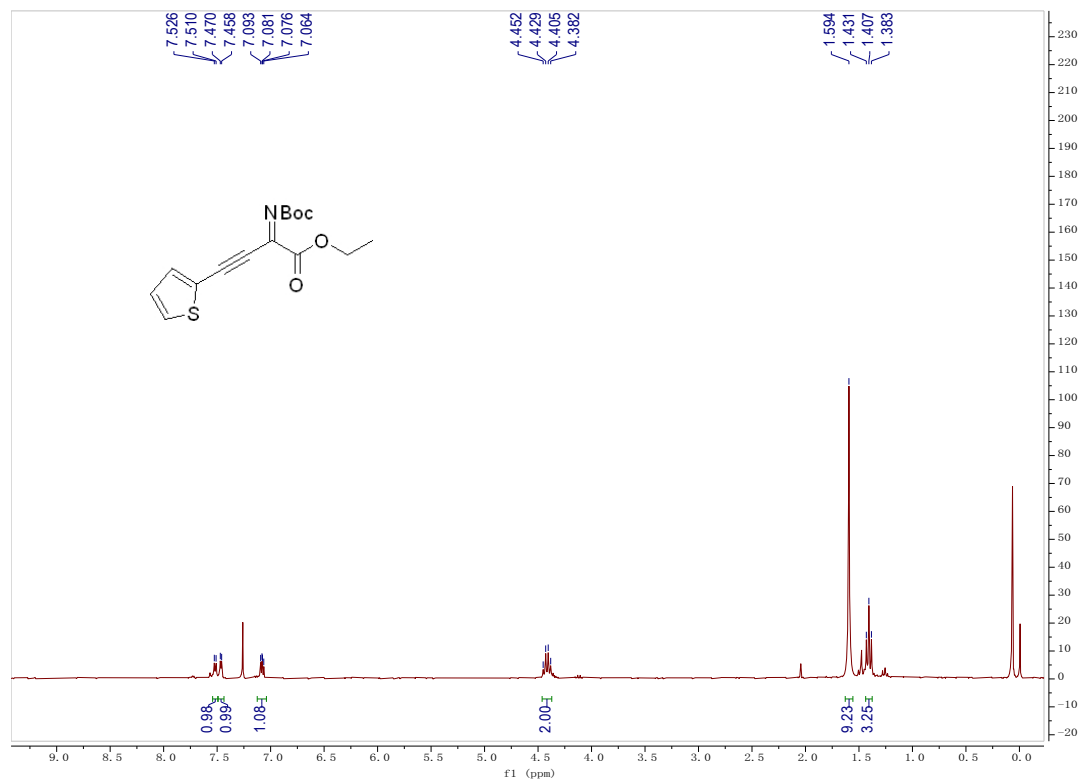

**Ethyl (*E*)-2-((*tert*-butoxycarbonyl)imino)-4-(naphthalen-2-yl)but-3-ynoate (2l)**

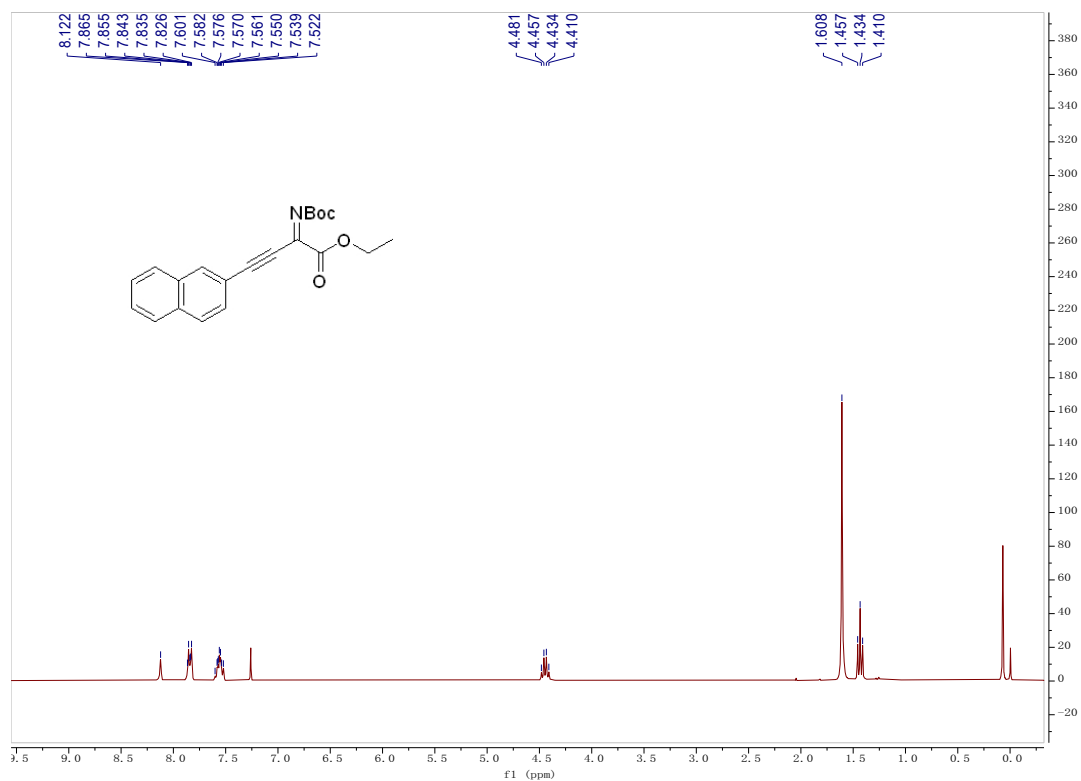

**Ethyl (*E*)-2-((*tert*-butoxycarbonyl)imino)-4-(triisopropylsilyl)but-3-ynoate (2m)**

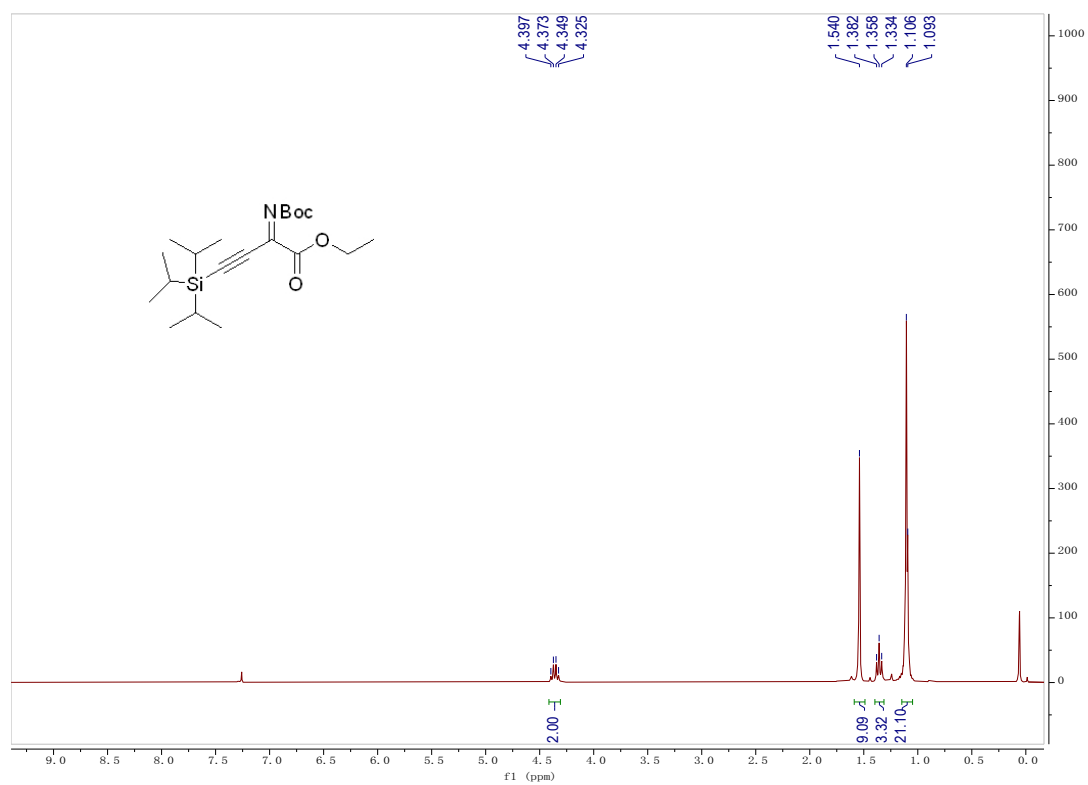

**Ethyl (*E*)-2-((*tert*-butoxycarbonyl)imino)-4-cyclopropylbut-3-ynoate (2n)**

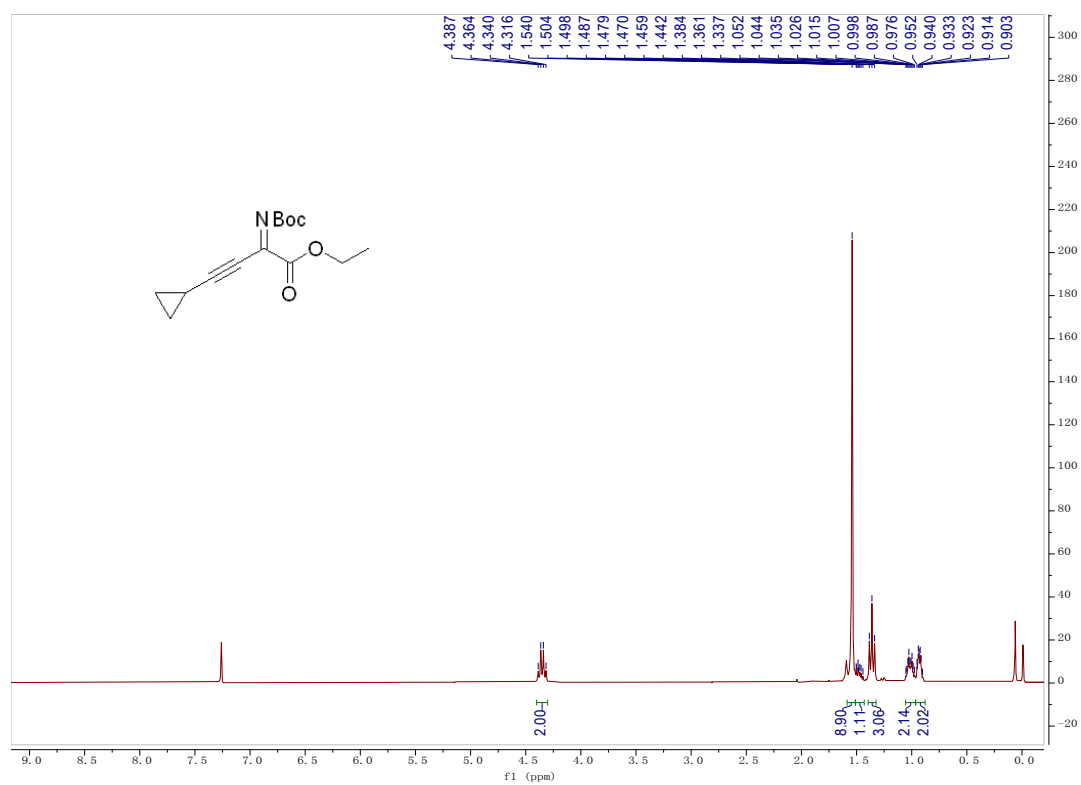

**Ethyl (S)-2-((*tert*-butoxycarbonyl)amino)-2-(5-(ethylamino)-3-phenylisoxazol-4-yl)-4-phenylbut-3-ynoate (3aa)**

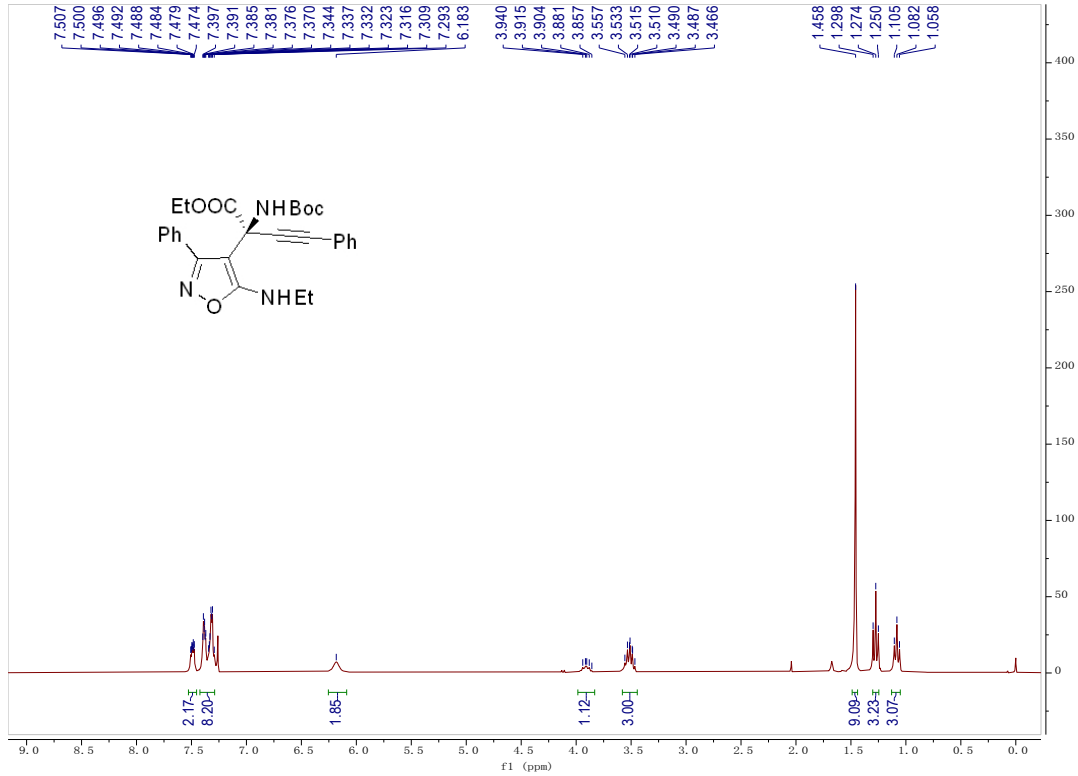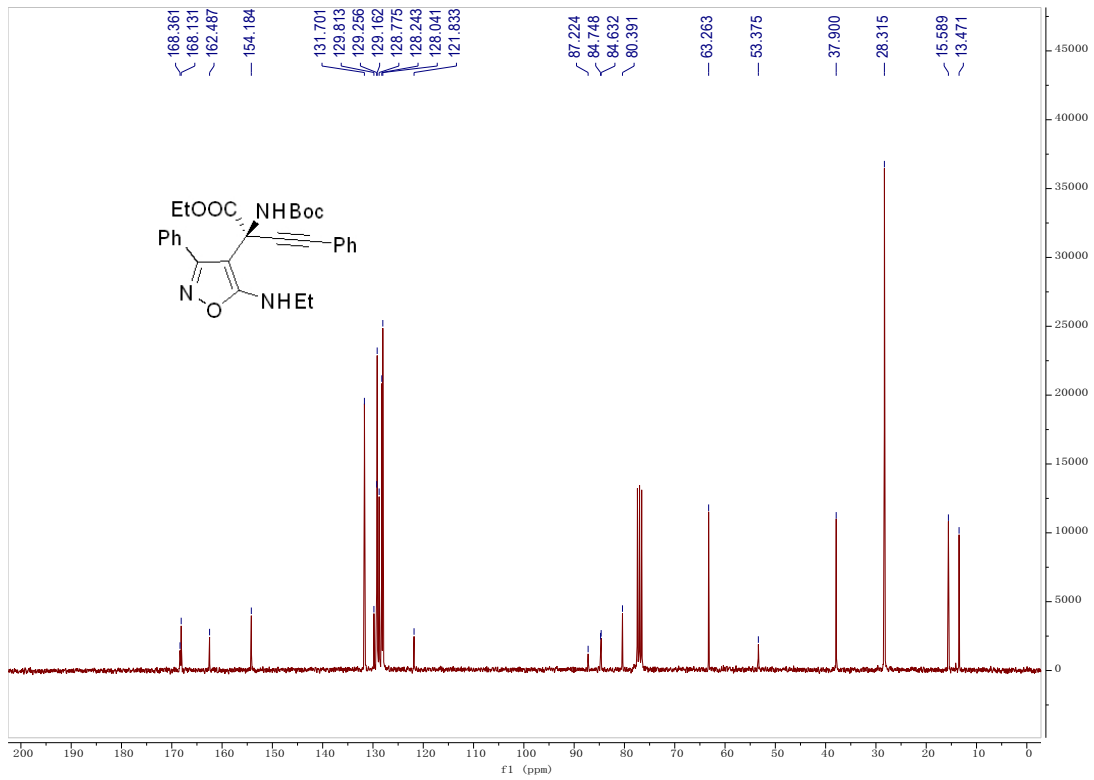

**Ethyl (S)-2-((*tert*-butoxycarbonyl)amino)-2-(5-(ethylamino)-3-(4-methoxyphenyl)isoxazol-4-yl)-4-phenylbut-3-ynoate (3ba)**

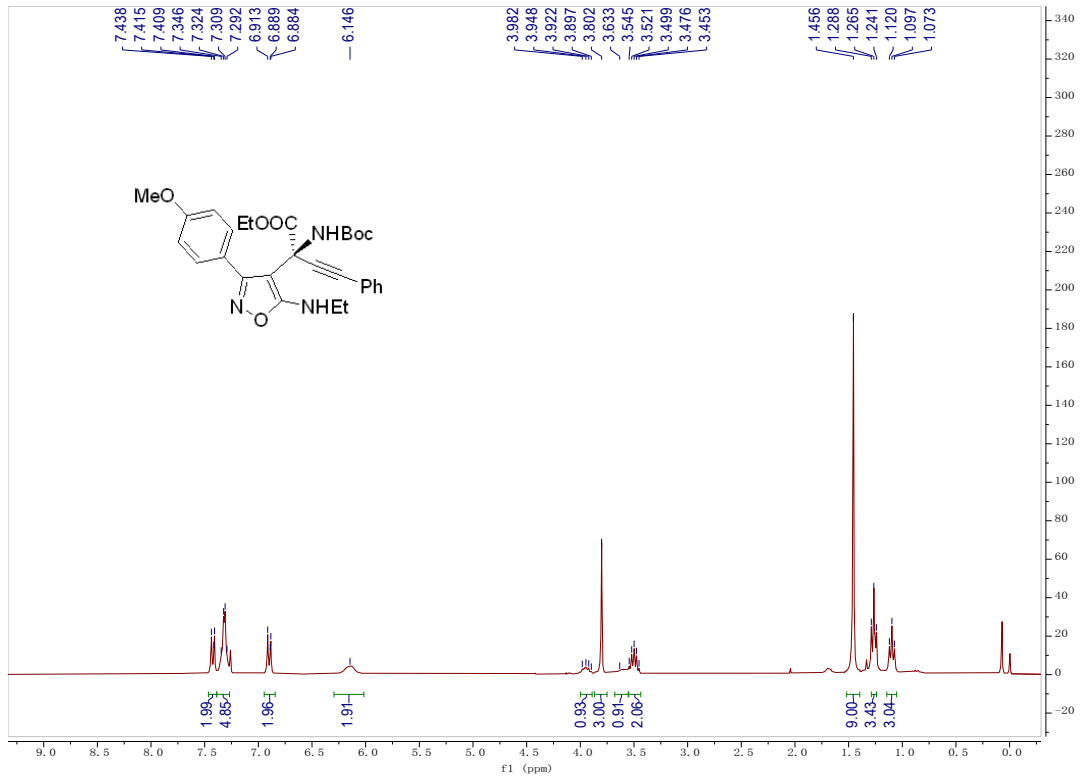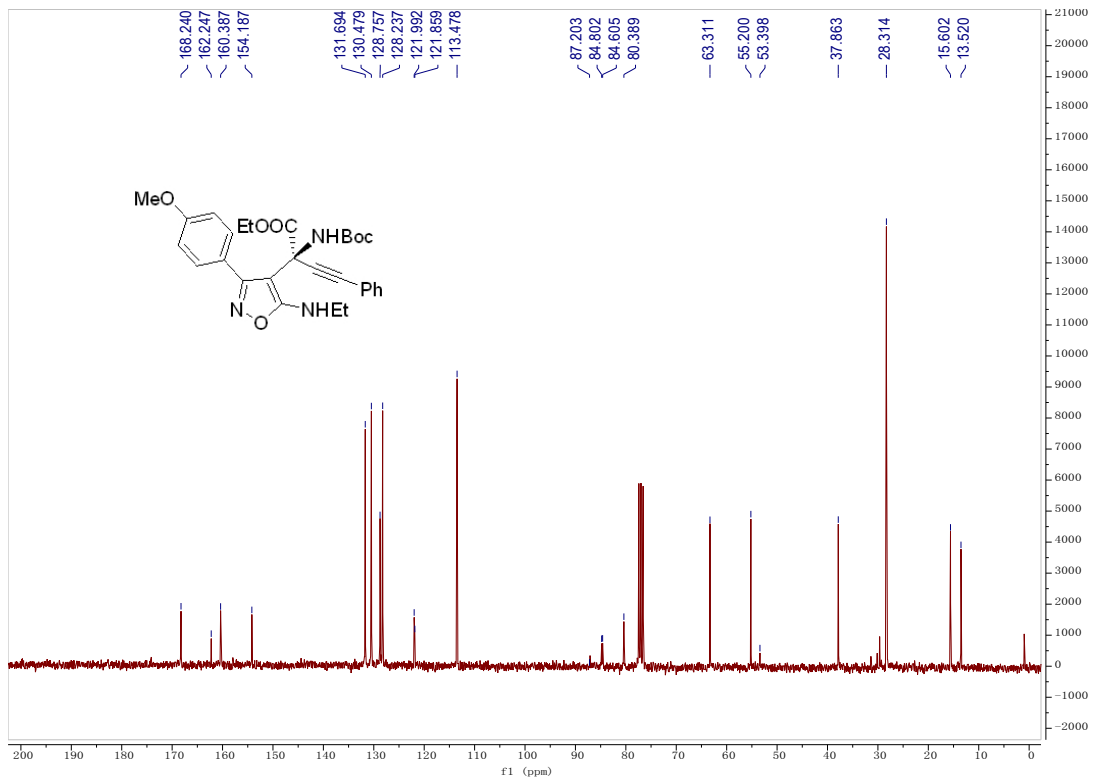

**Ethyl (S)-2-((*tert*-butoxycarbonyl)amino)-2-(5-(ethylamino)-3-(4-fluorophenyl)isoxazol-4-yl)-4-phenylbut-3-ynoate (3ca)**

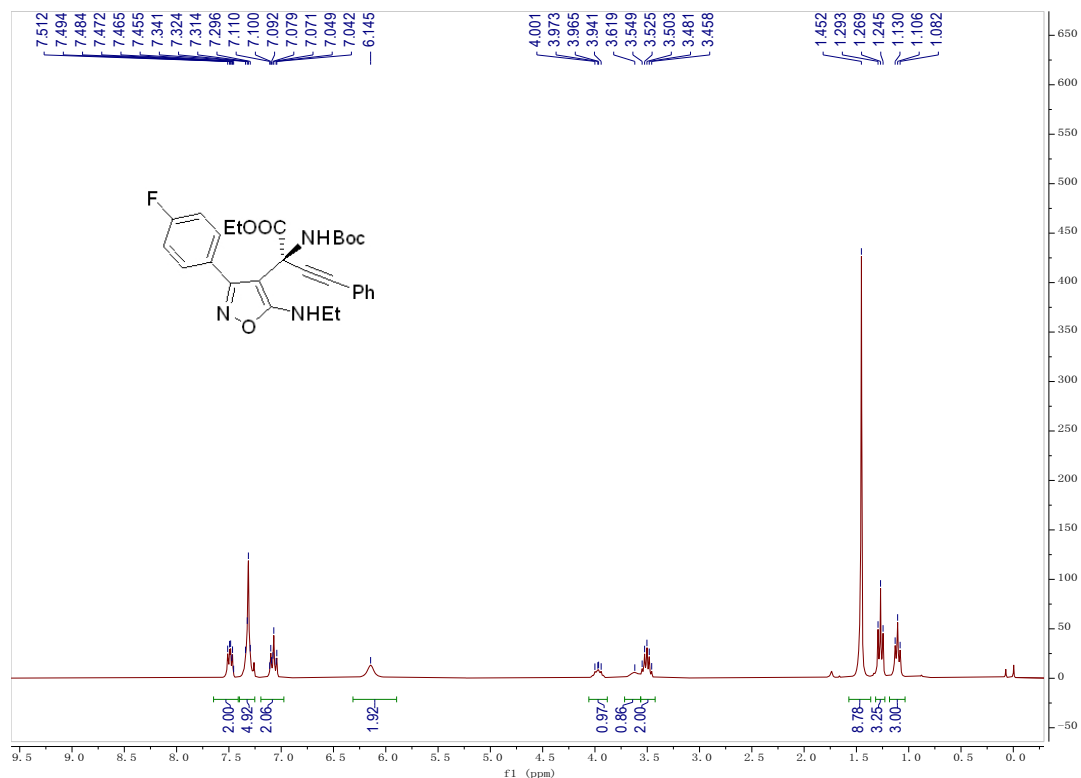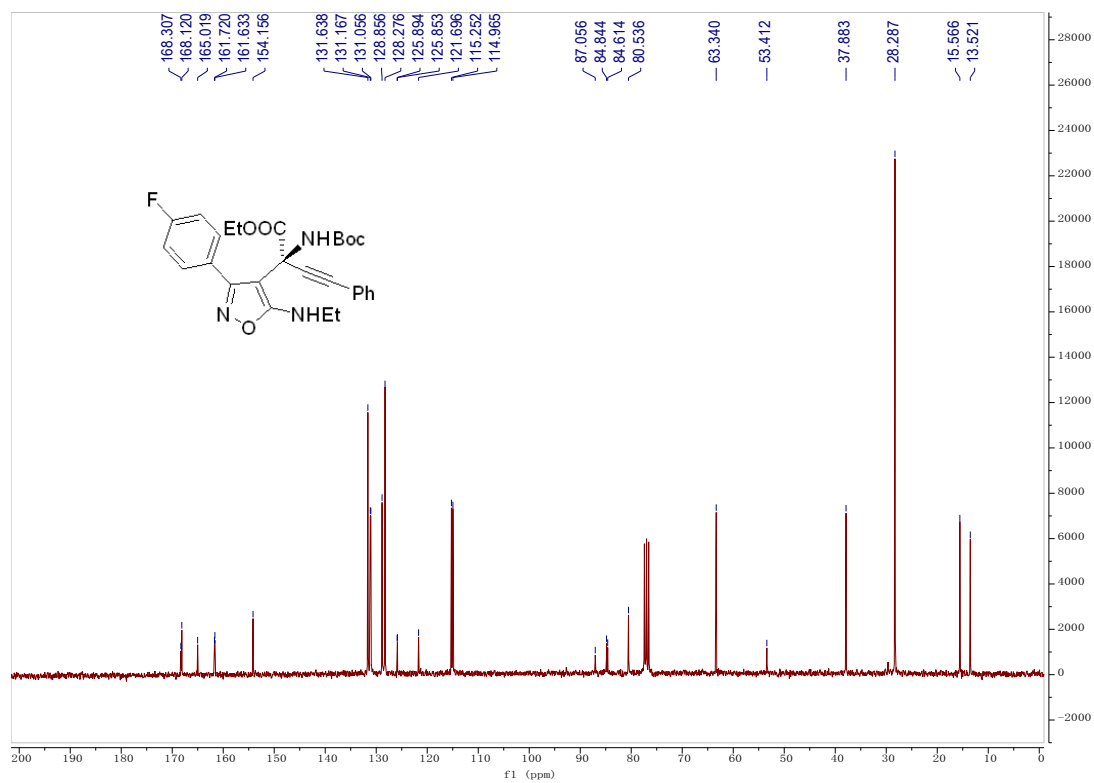

**Ethyl (S)-2-(3-(4-bromophenyl)-5-(ethylamino)isoxazol-4-yl)-2-((tert-butoxycarbonyl)amino)-4-phenylbut-3-ynoate (3da)**

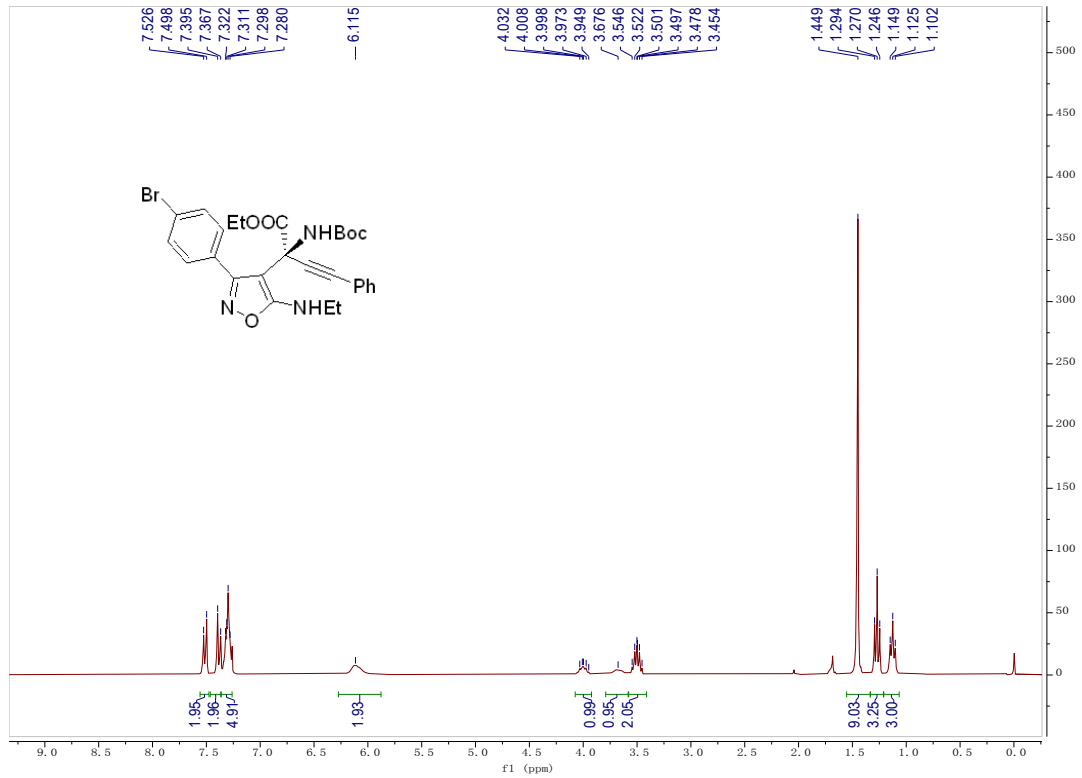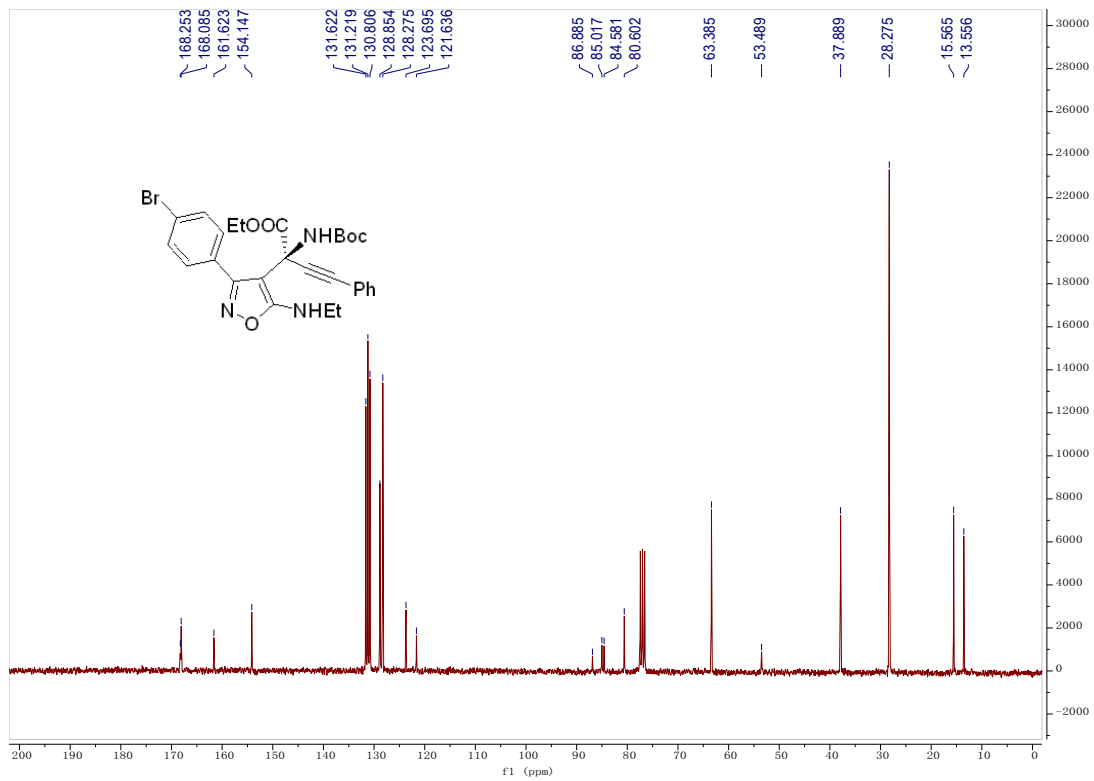



**Ethyl (S)-2-((*tert*-butoxycarbonyl)amino)-2-(3-(2-chlorophenyl)-5-(ethylamino)isoxazol-4-yl)-4-phenylbut-3-ynoate (3ea)**

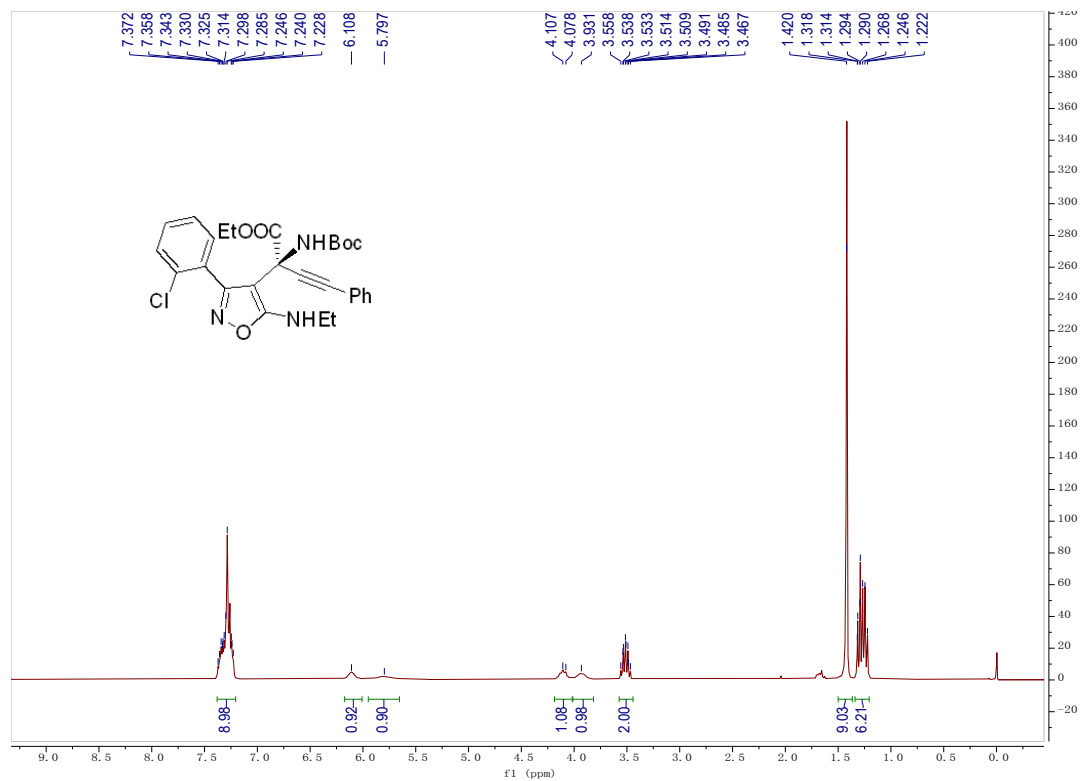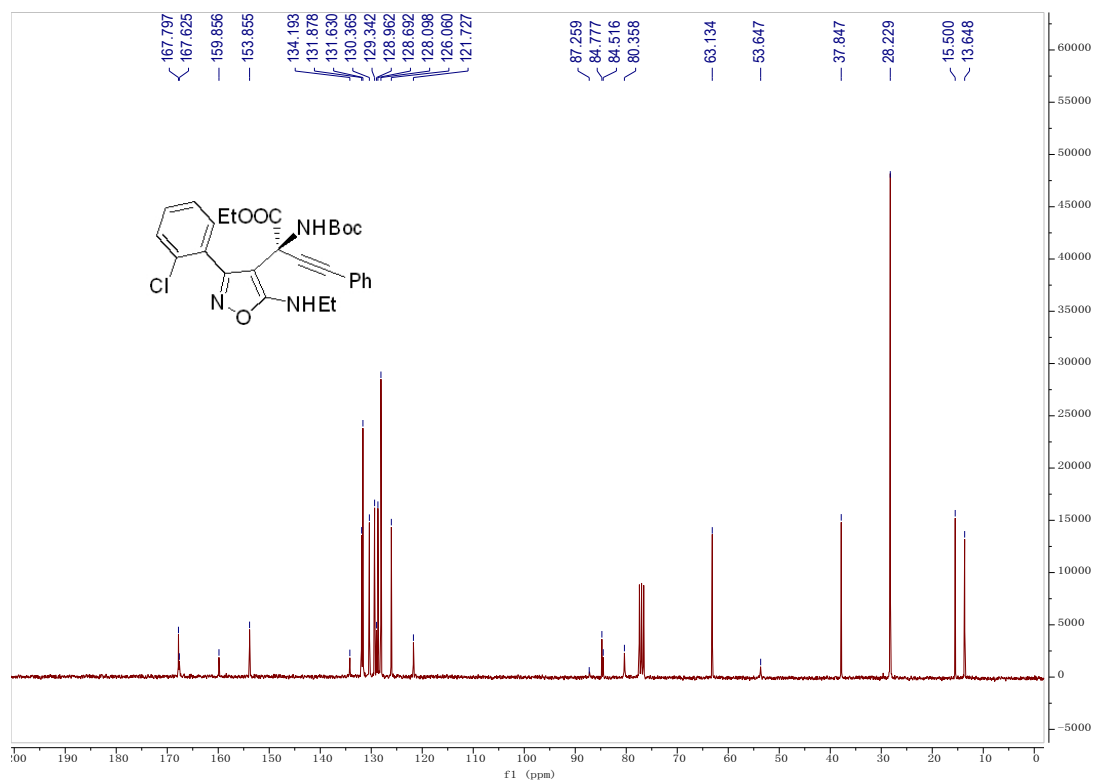

**Ethyl (S)-2-((*tert*-butoxycarbonyl)amino)-2-(3-(3-chlorophenyl)-5-(ethylamino)isoxazol-4-yl)-4-phenylbut-3-ynoate (3fa)**

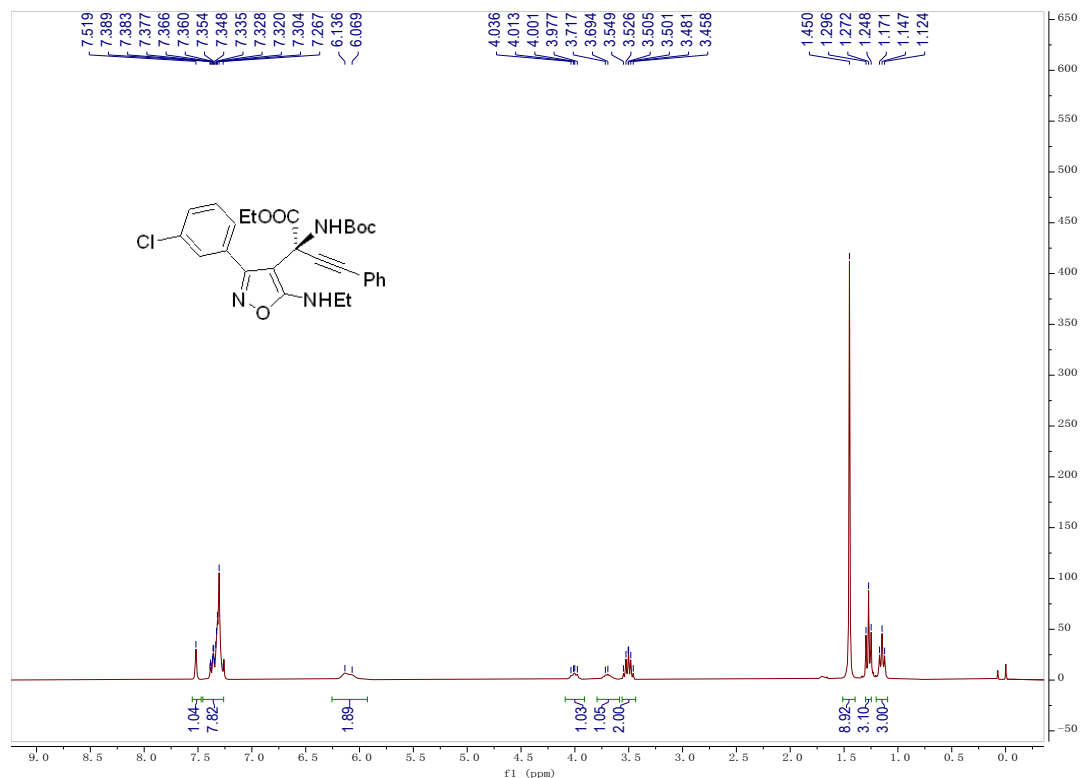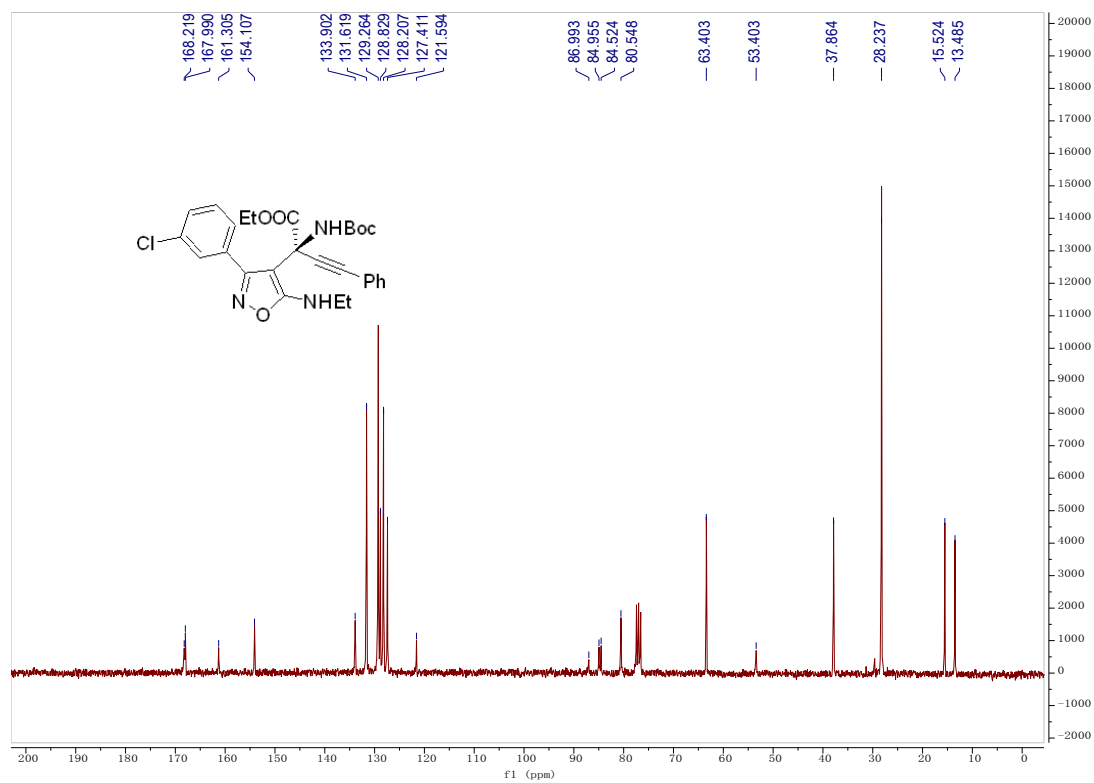

**Ethyl (*S*)-2-((*tert*-butoxycarbonyl)amino)-2-(3-(4-chlorophenyl)-5-(ethylamino)isoxazol-4-yl)-4-phenylbut-3-ynoate (3ga)**

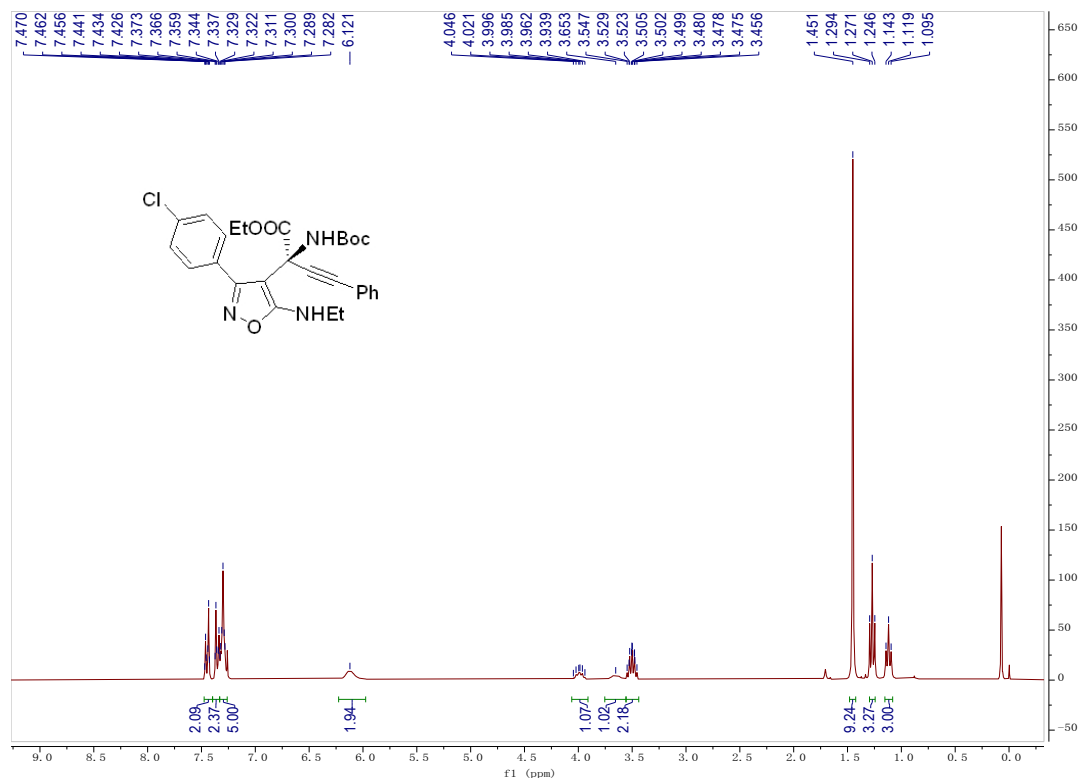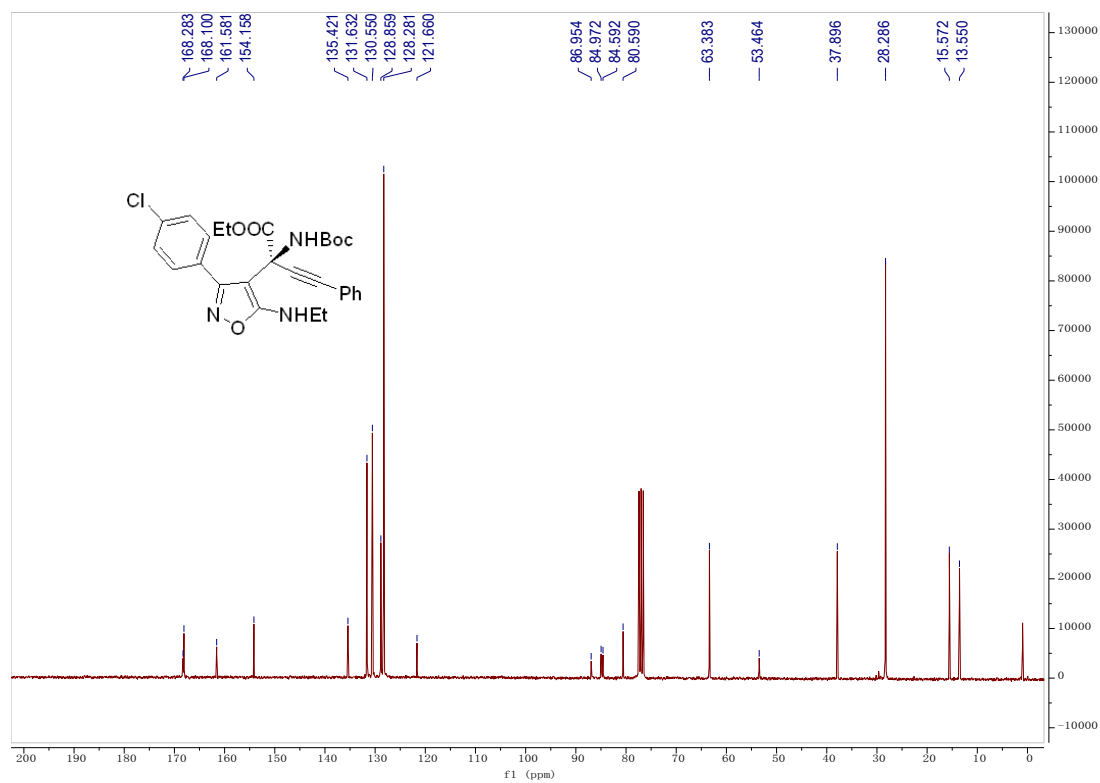

**Ethyl (S)-2-((tert-butoxycarbonyl)amino)-2-(5-(ethylamino)-3-(thiophen-2-yl)isoxazol-4-yl)-4-phenylbut-3-ynoate (3ha)**

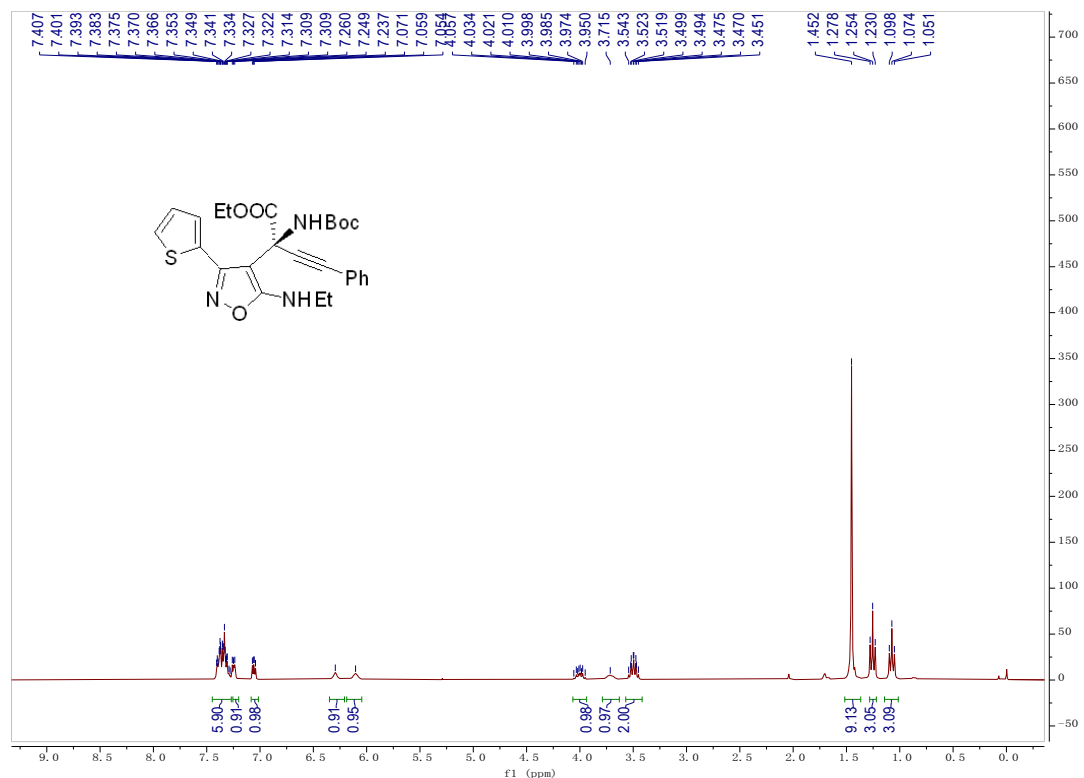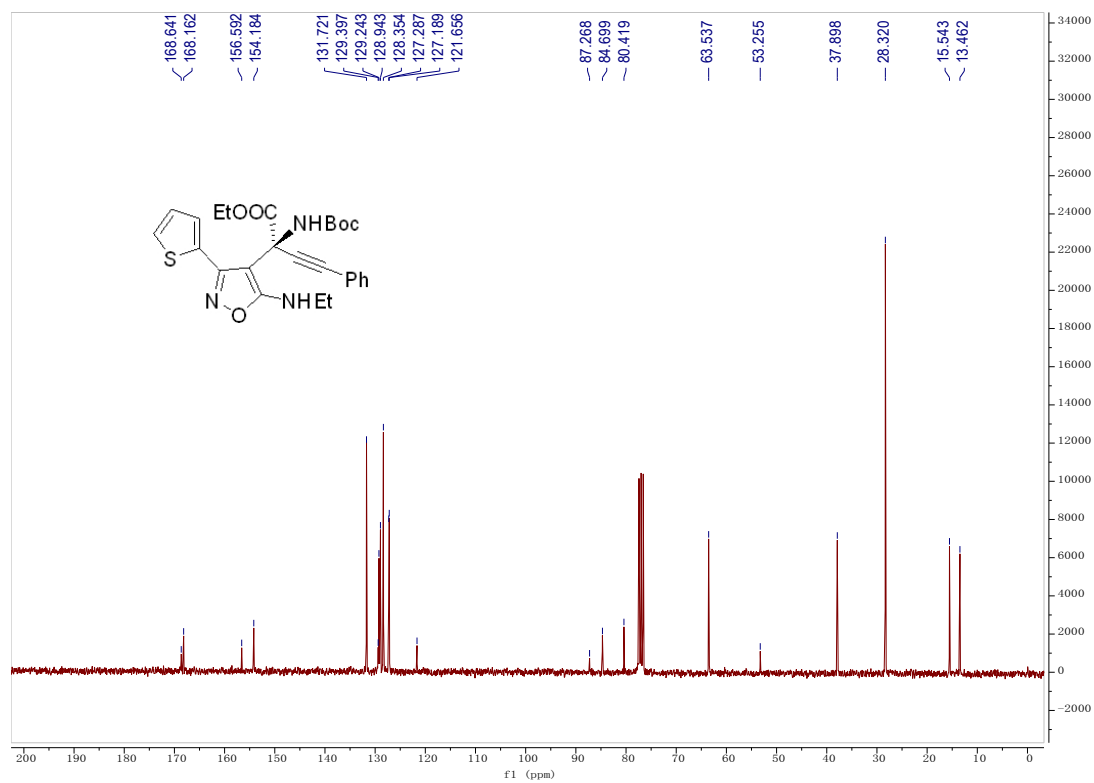

**Ethyl (S)-2-((*tert*-butoxycarbonyl)amino)-2-(5-(ethylamino)-3-(furan-2-yl)isoxazol-4-yl)-4-phenylbut-3-ynoate (3ia)**

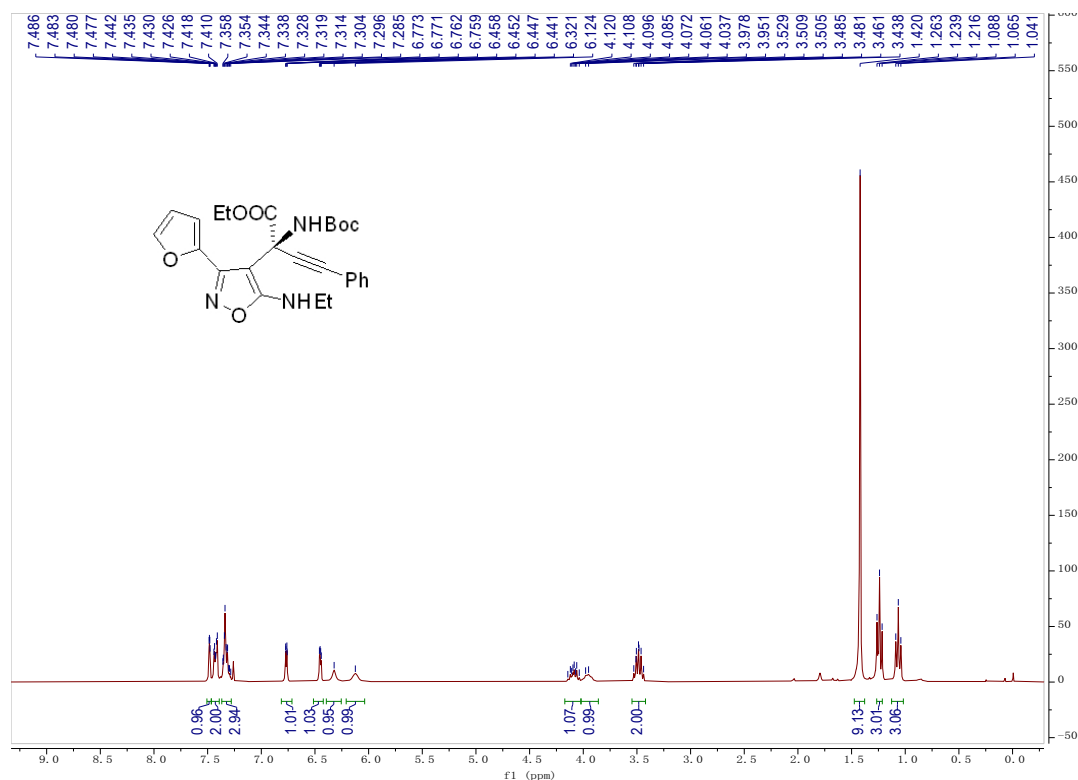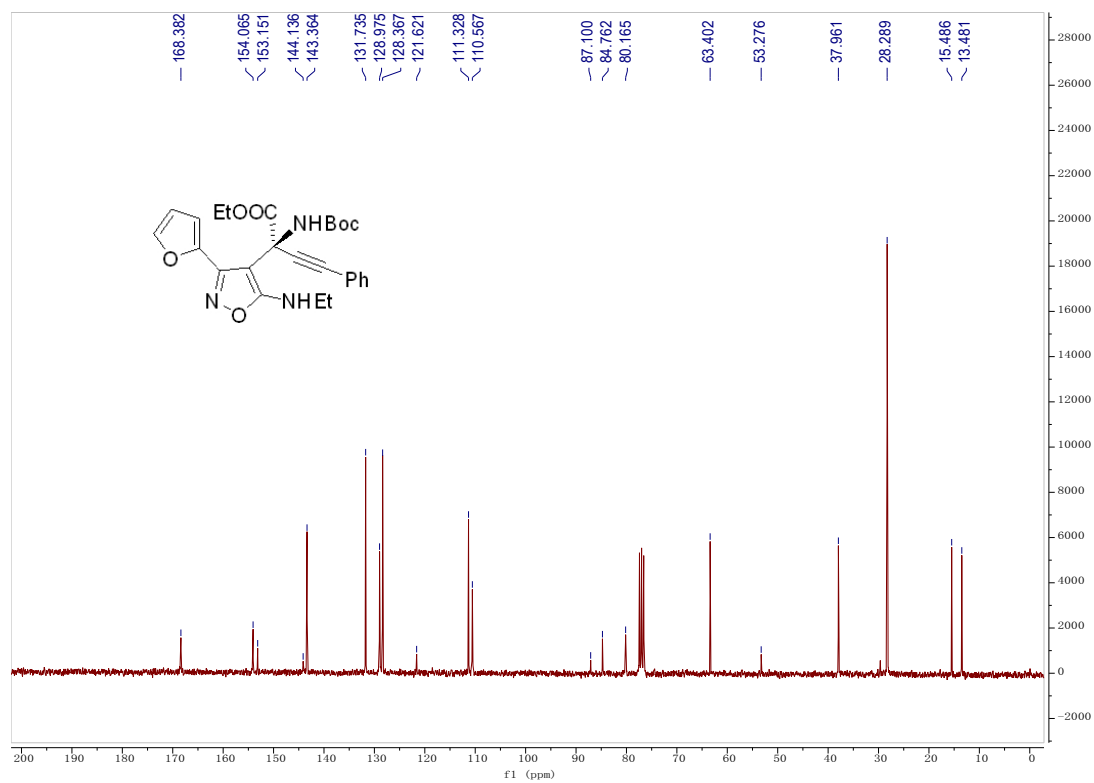

**Ethyl (S)-2-((tert-butoxycarbonyl)amino)-2-(5-(ethylamino)-3-methylisoxazol-4-yl)-4-phenylbut-3-ynoate (3ja)**

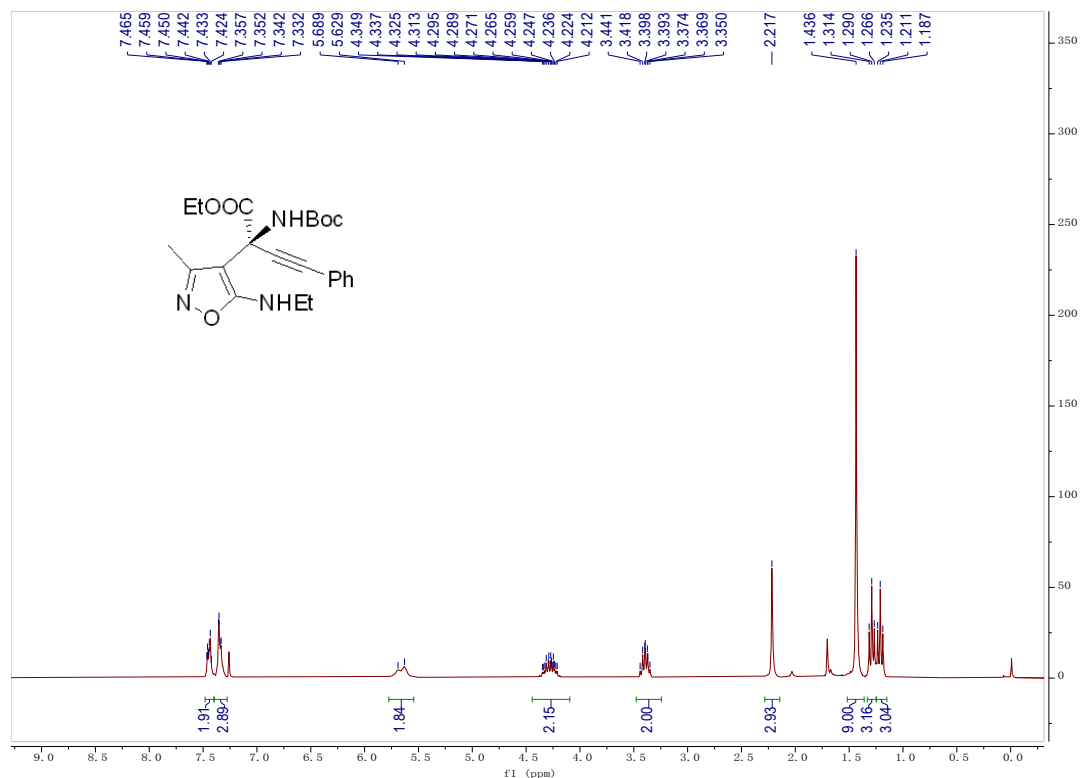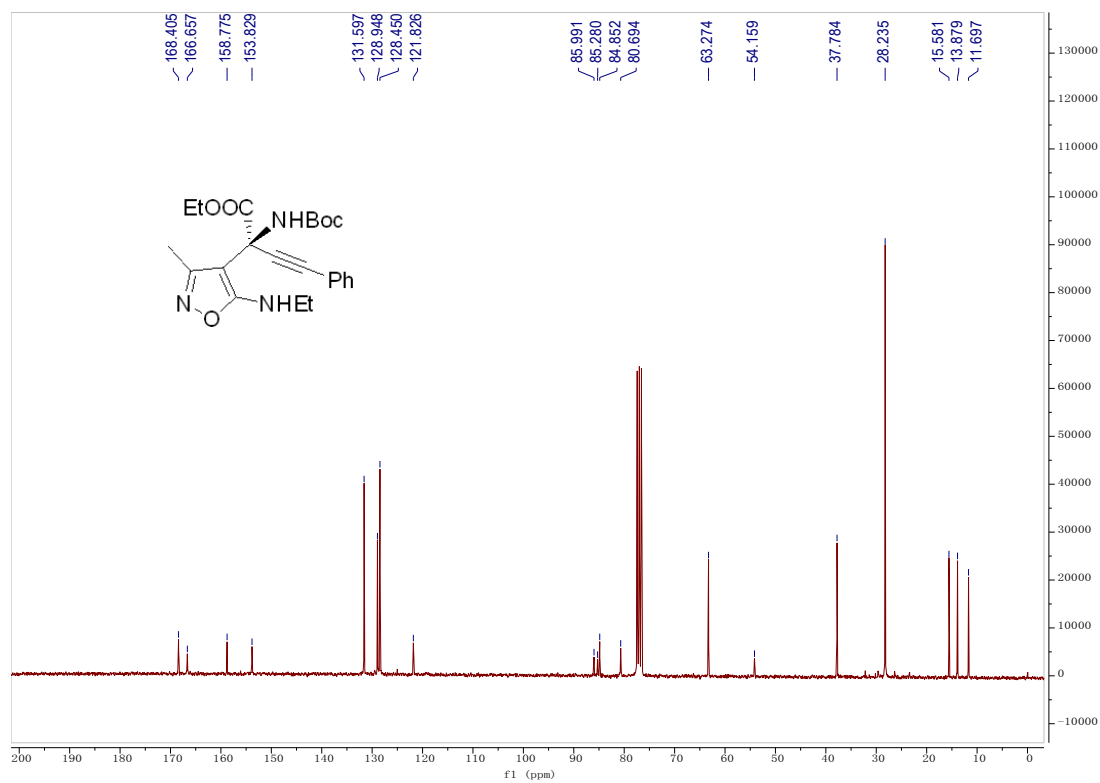

**Ethyl (S)-2-((*tert*-butoxycarbonyl)amino)-2-(5-(methylamino)-3-phenylisoxazol-4-yl)-4-phenylbut-3-ynoate (3la)**

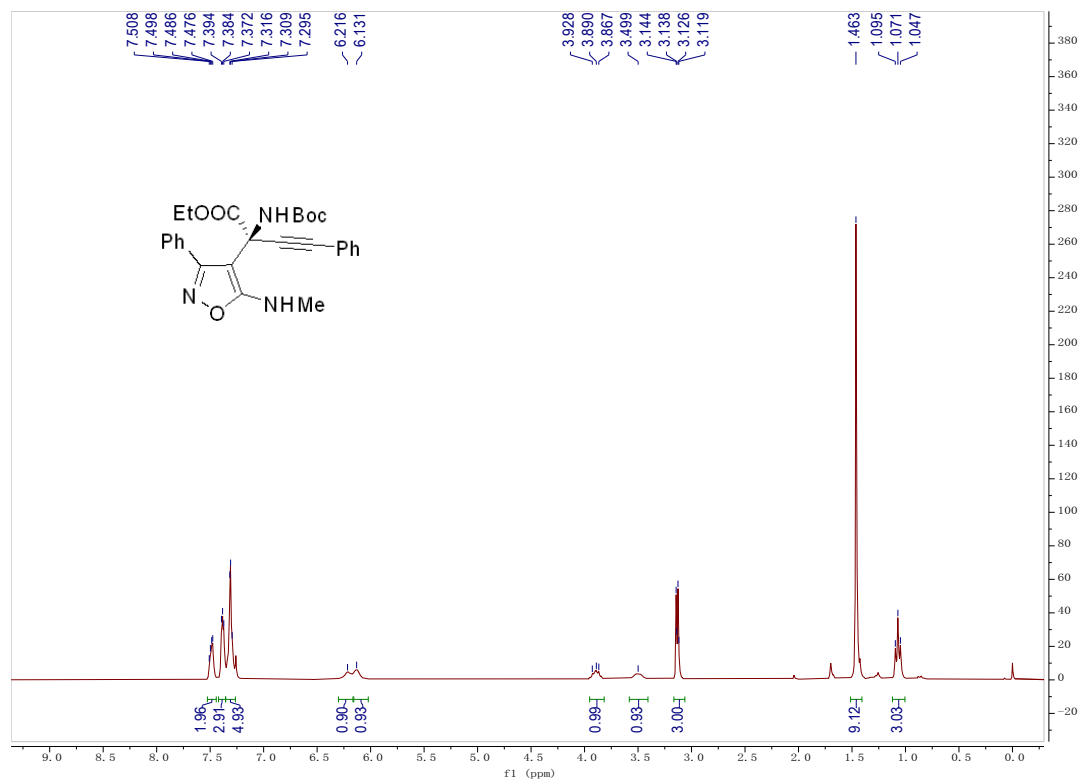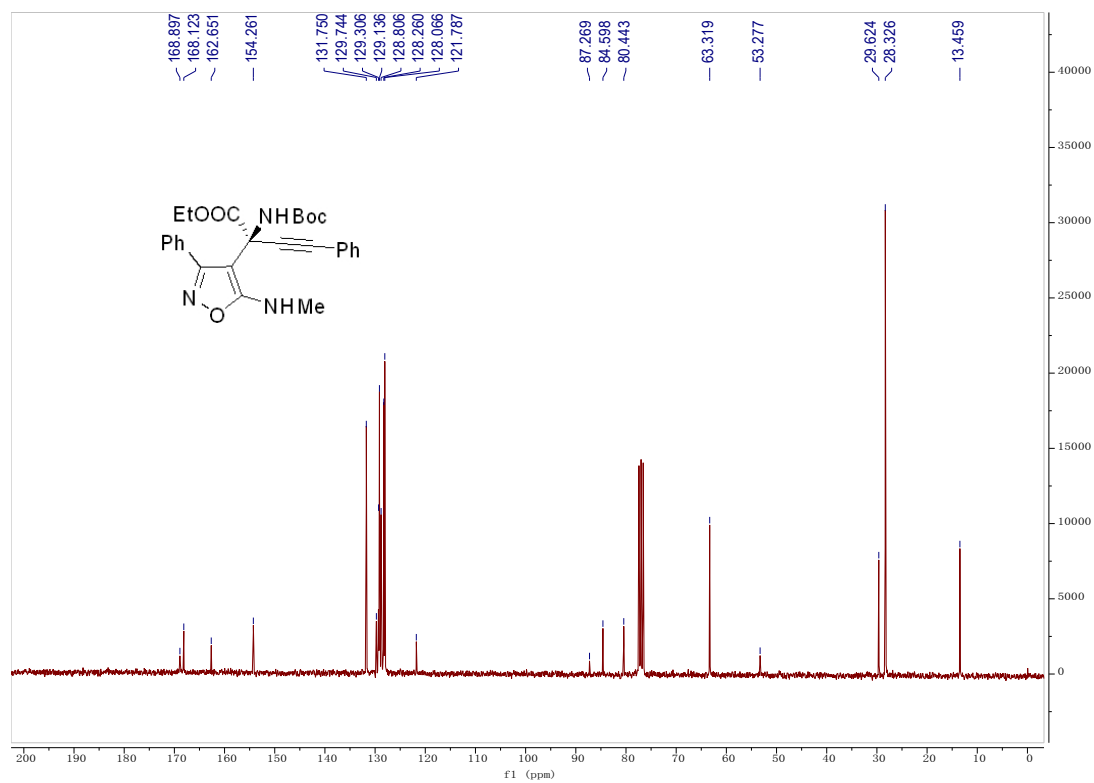

**Ethyl (S)-2-((tert-butoxycarbonyl)amino)-2-(5-(butylamino)-3-phenylisoxazol-4-yl)-4-phenylbut-3-ynoate (3ma)**

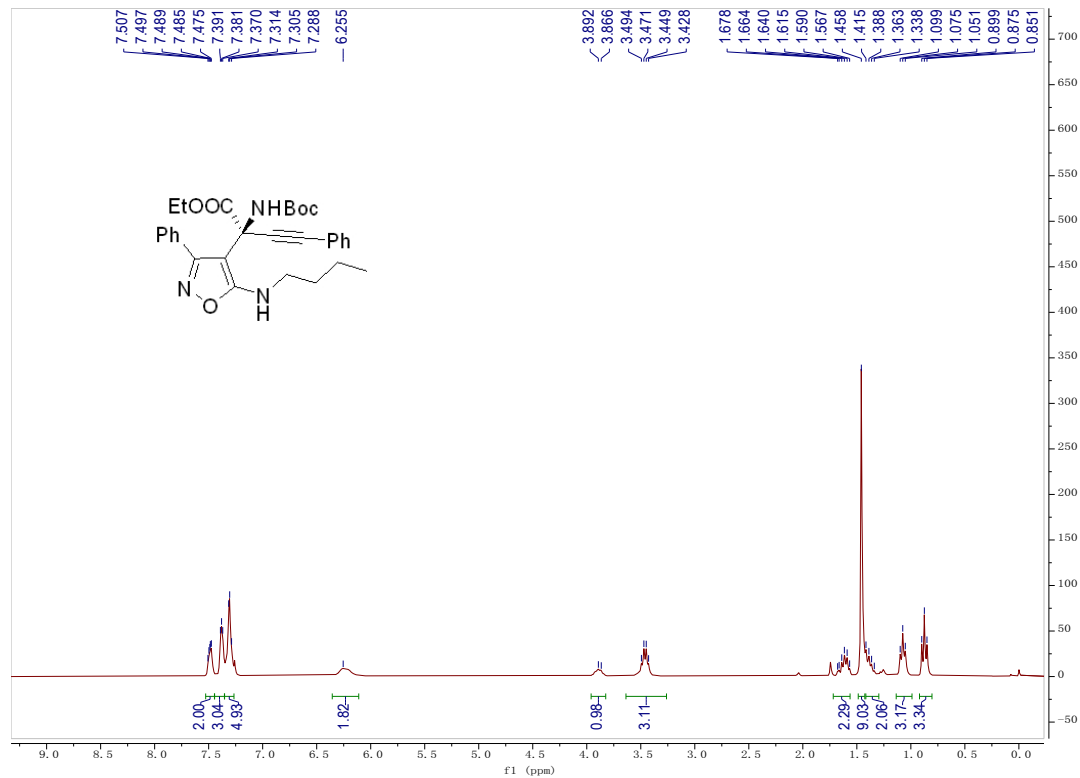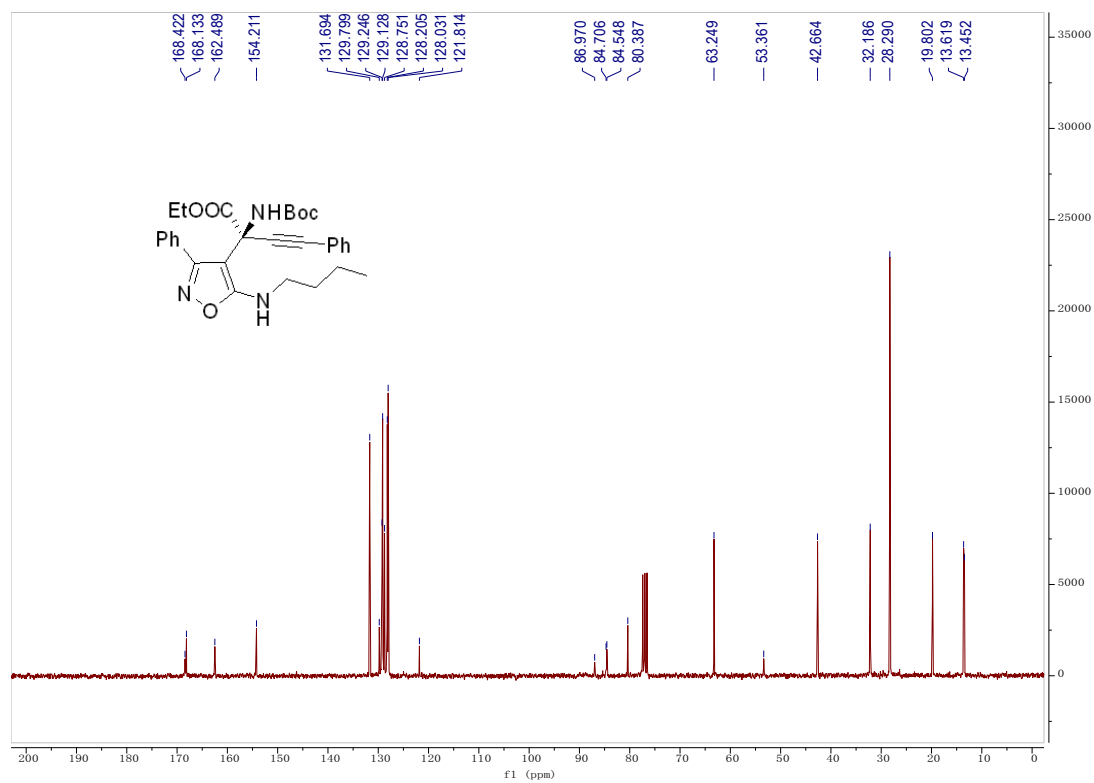



**Ethyl (S)-2-(5-(benzylamino)-3-phenylisoxazol-4-yl)-2-((tert-butoxycarbonyl) amino)-4-phenylbut-3-ynoate (3na)**

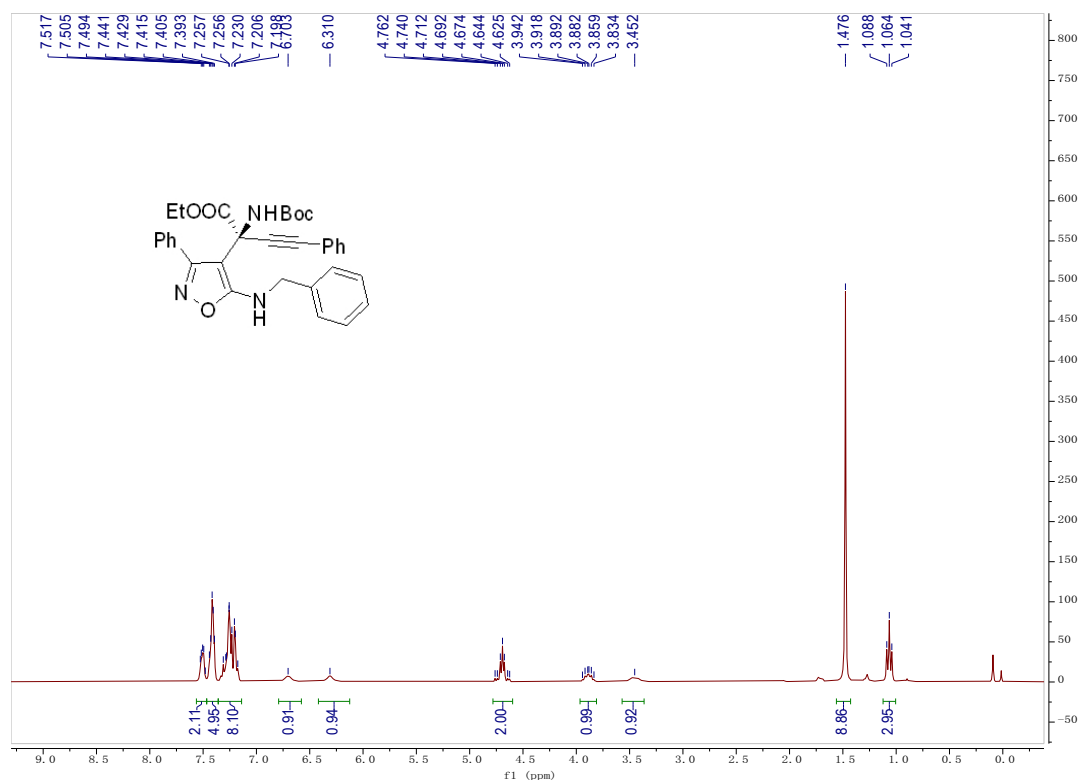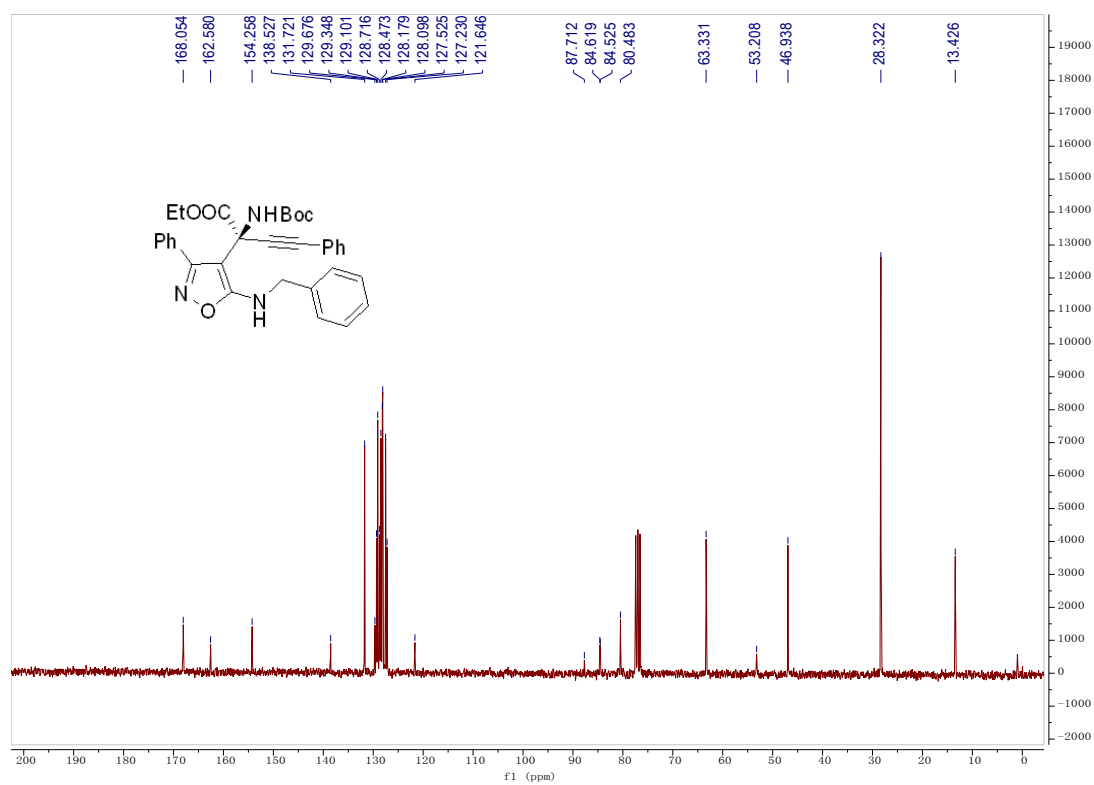

**Ethyl (S)-2-(5-(allylamino)-3-phenylisoxazol-4-yl)-2-((tert-butoxycarbonyl) amino)-4-phenylbut-3-ynoate (30a)**

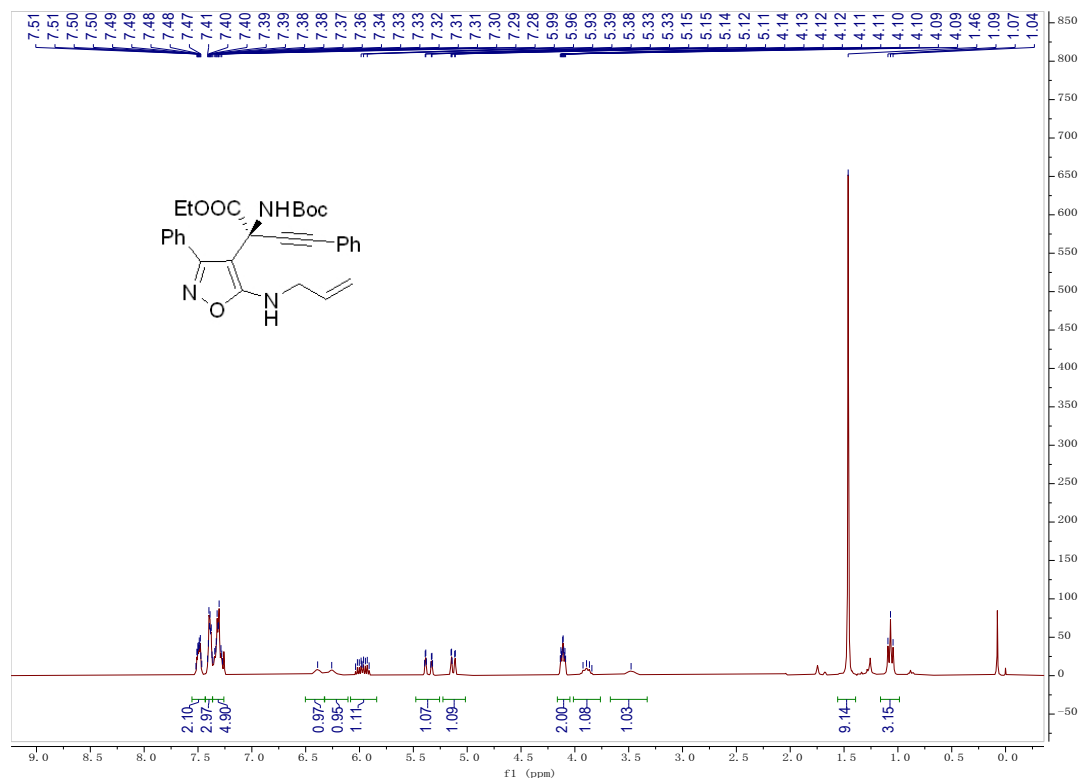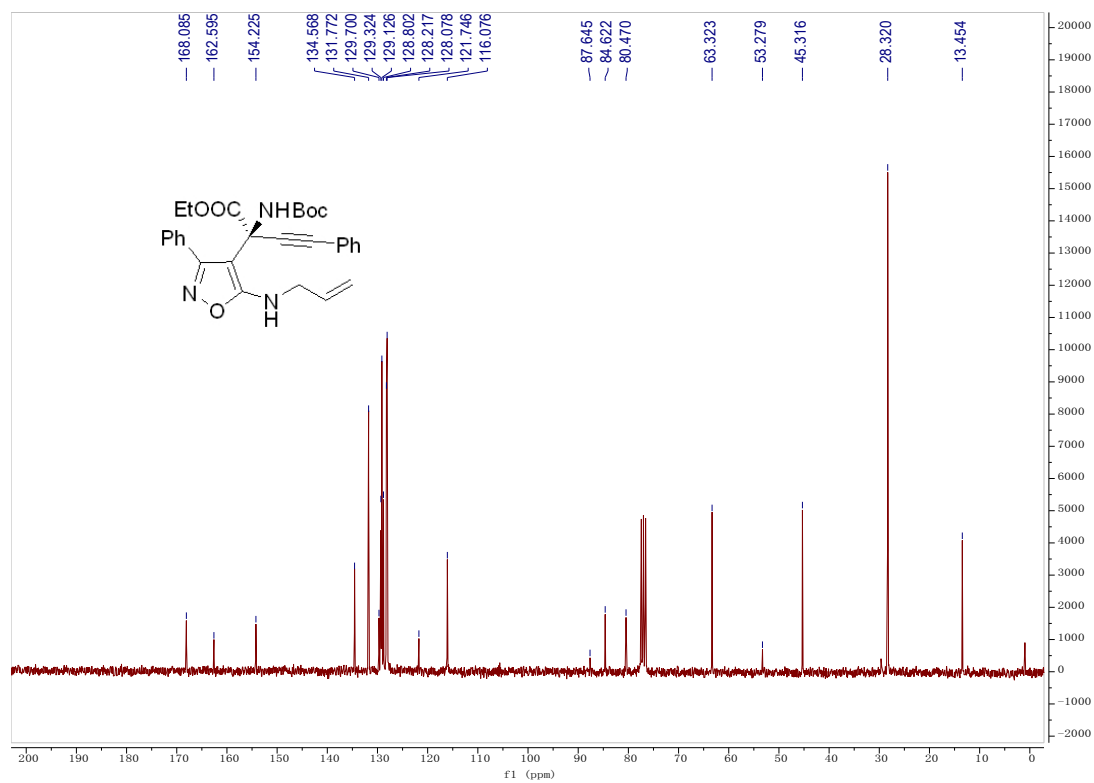

**Ethyl (S)-2-((tert-butoxycarbonyl)amino)-2-(5-(ethylamino)-3-(4-methoxyphenyl)isothiazol-4-yl)-4-phenylbut-3-ynoate (3qa)**

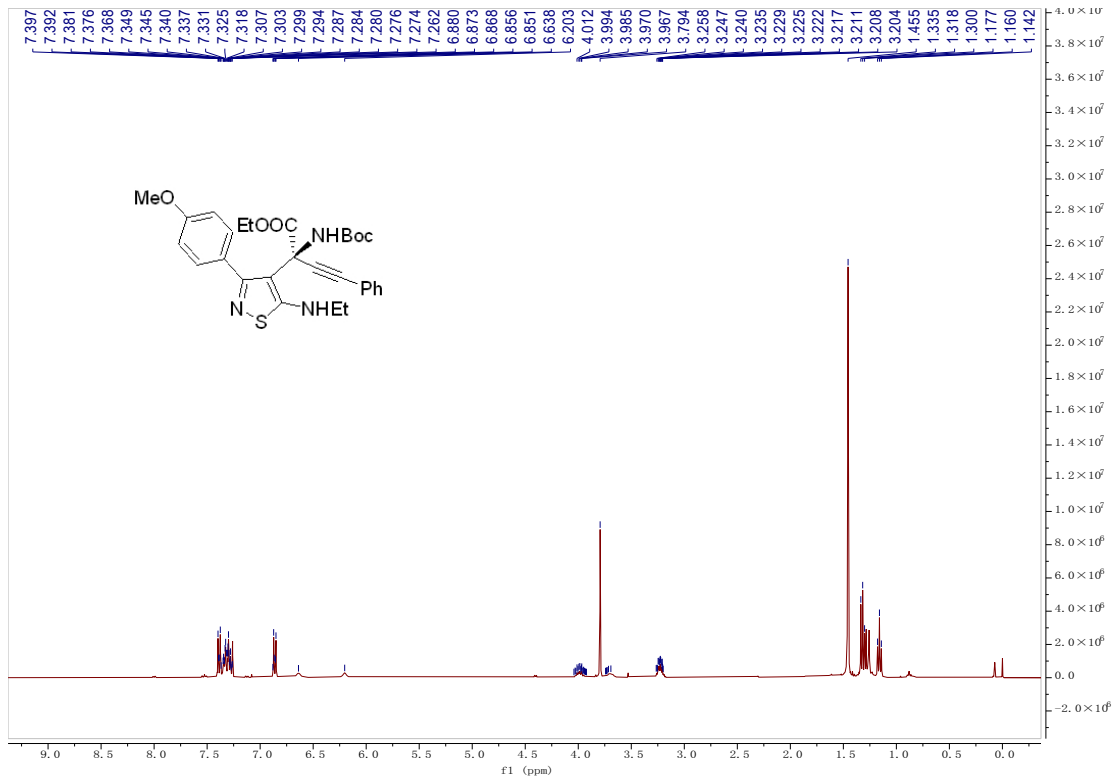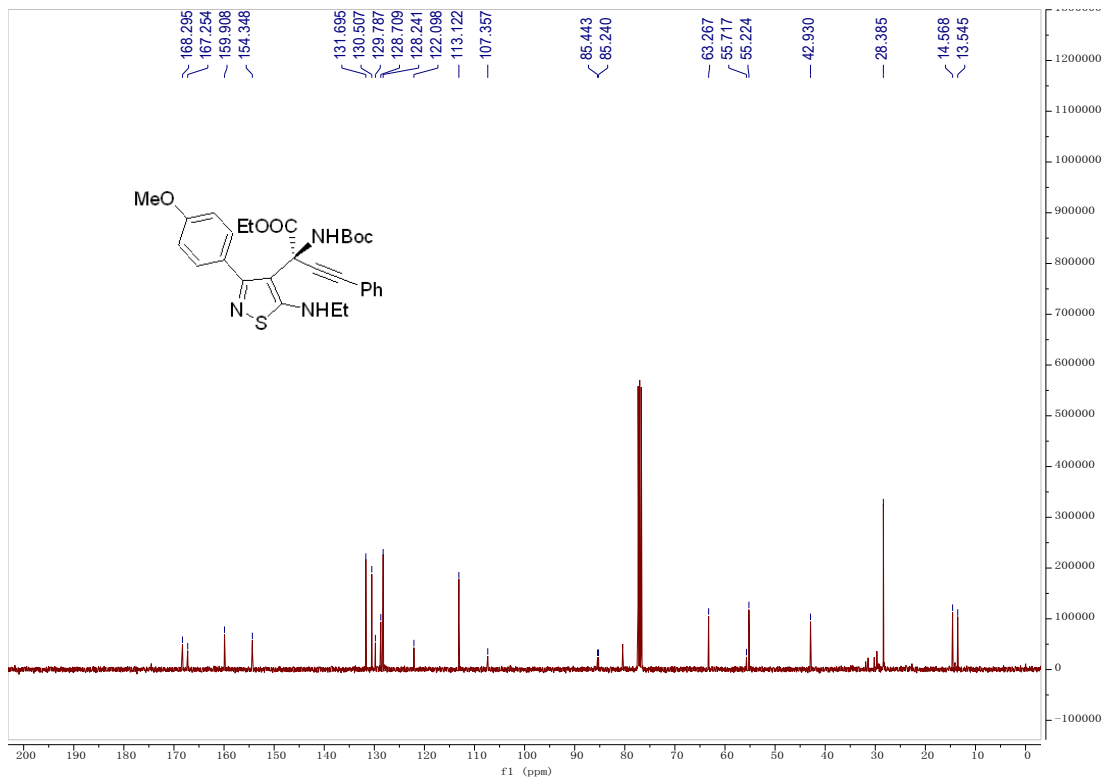

**Ethyl (S)-2-((*tert*-butoxycarbonyl)amino)-2-(5-(ethylamino)-3-phenylisoxazol-4-yl)-4-(4-methoxyphenyl)but-3-ynoate (3ab)**

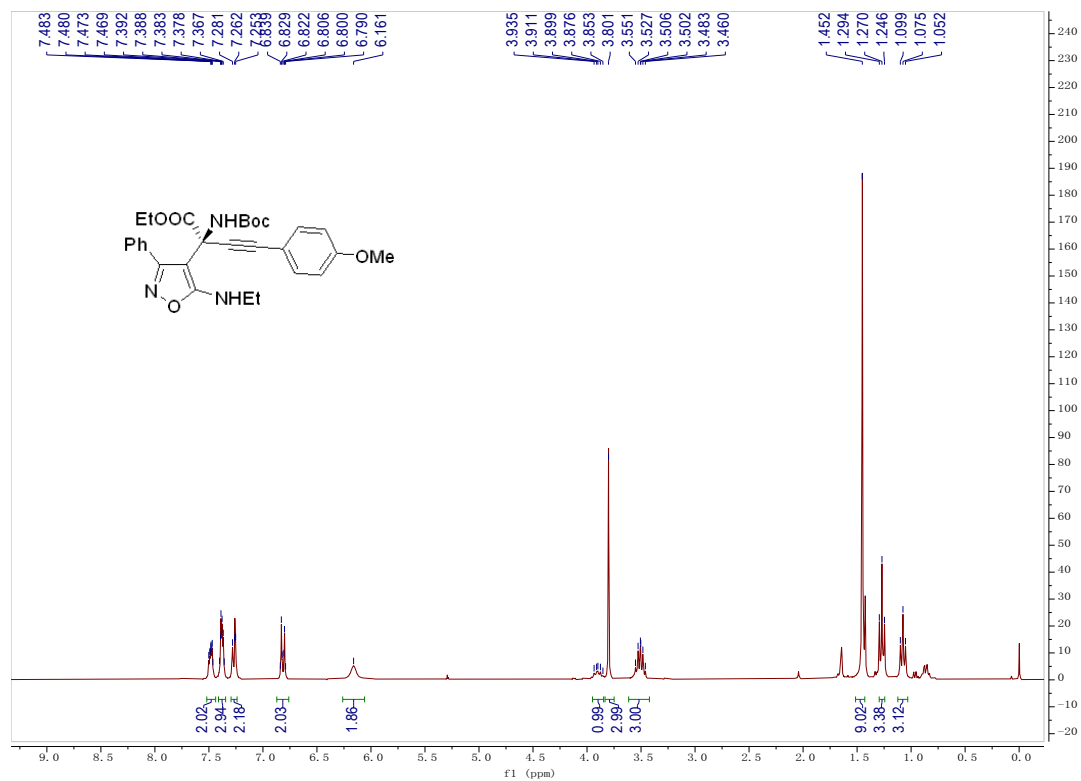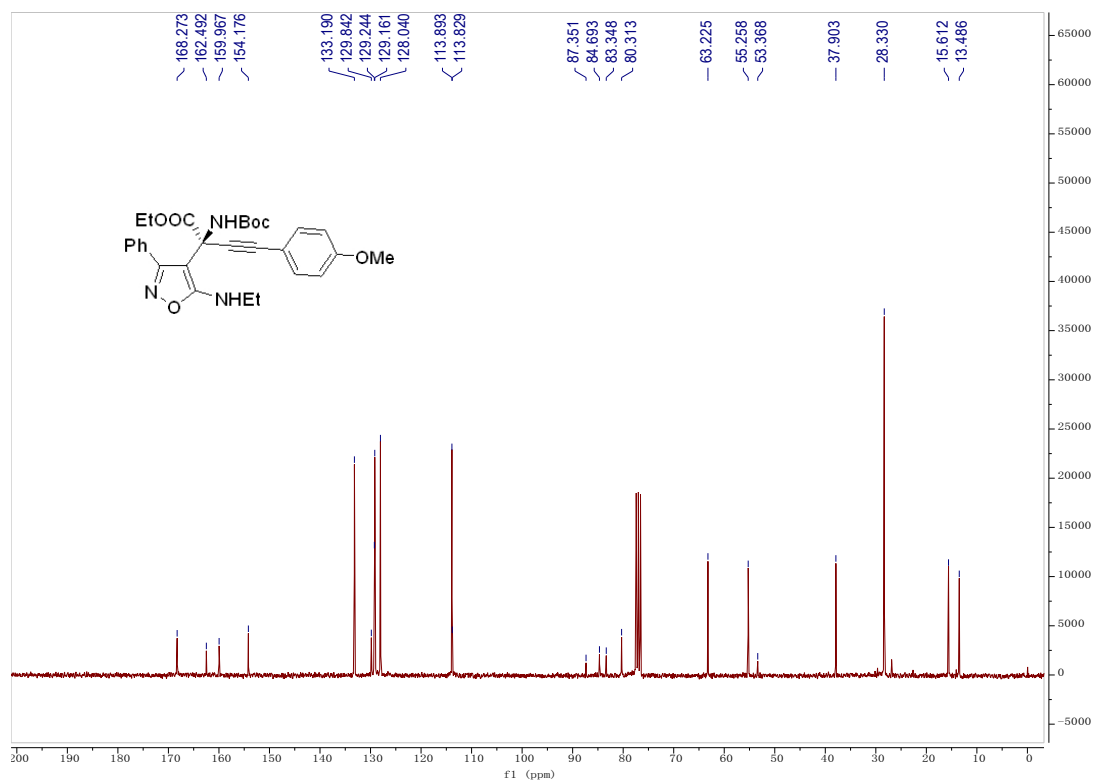

**Ethyl (S)-2-((tert-butoxycarbonyl)amino)-2-(5-(ethylamino)-3-phenylisoxazol-4-yl)-4-(m-tolyl)but-3-ynoate (3ac)**

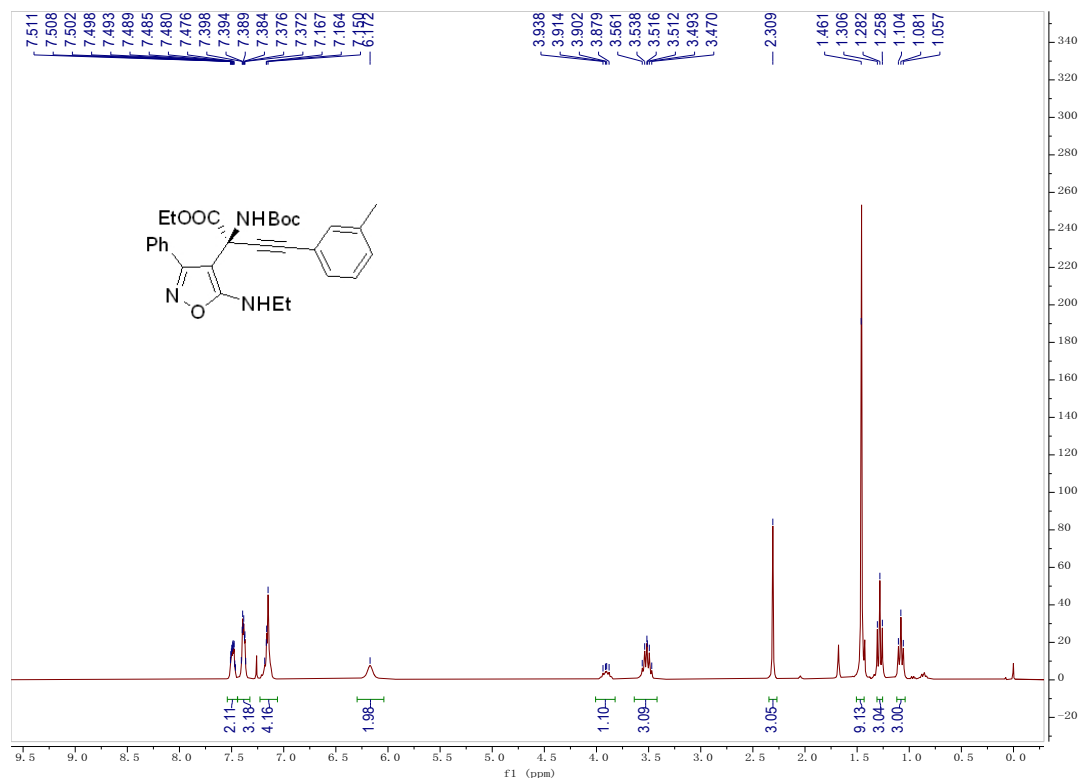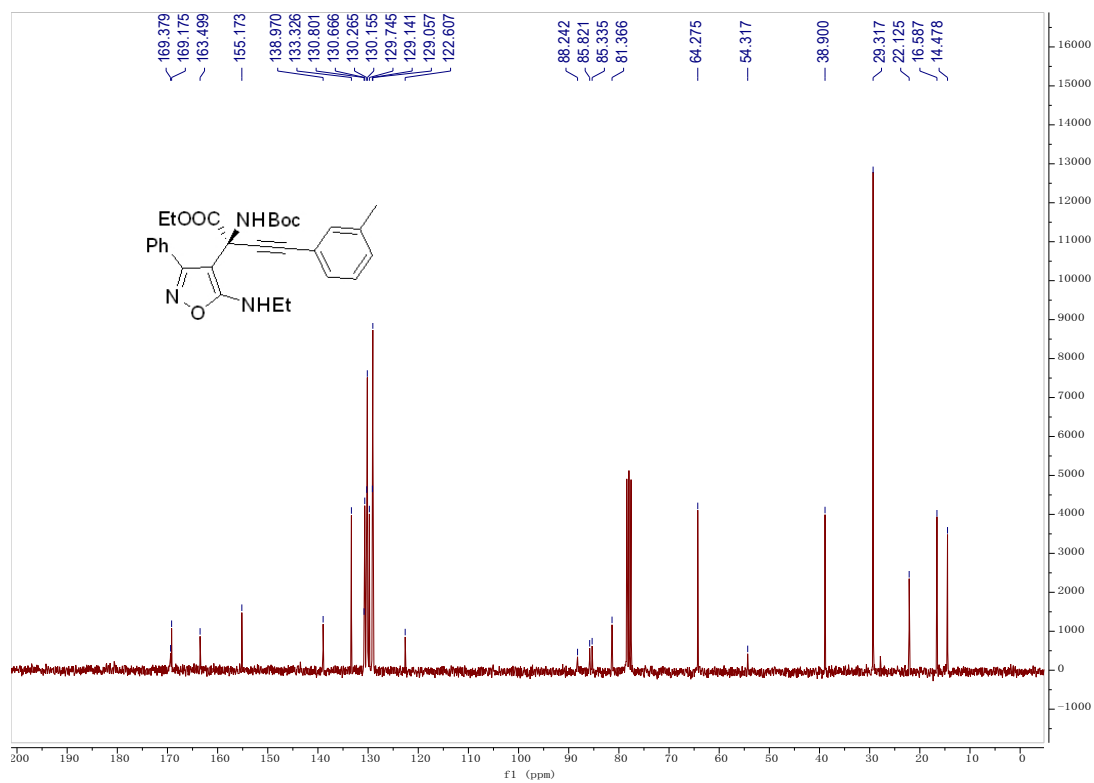

**Ethyl (S)-2-((tert-butoxycarbonyl)amino)-2-(5-(ethylamino)-3-phenylisoxazol-4-yl)-4-(p-tolyl)but-3-ynoate (3ad)**

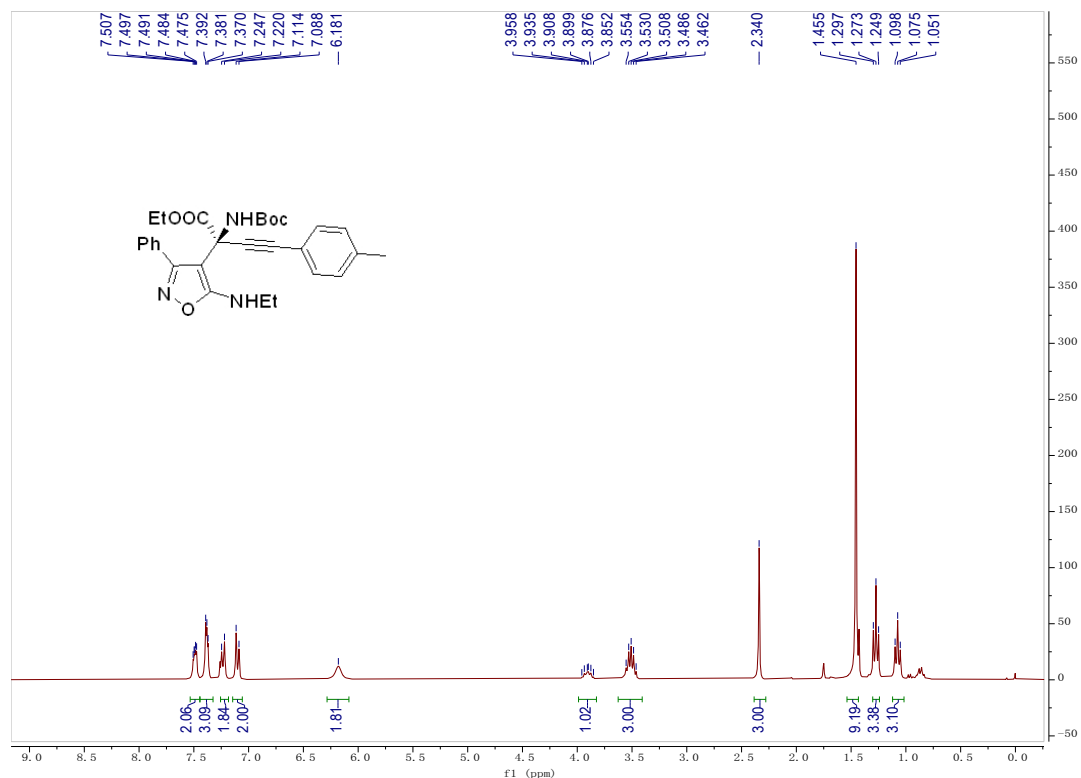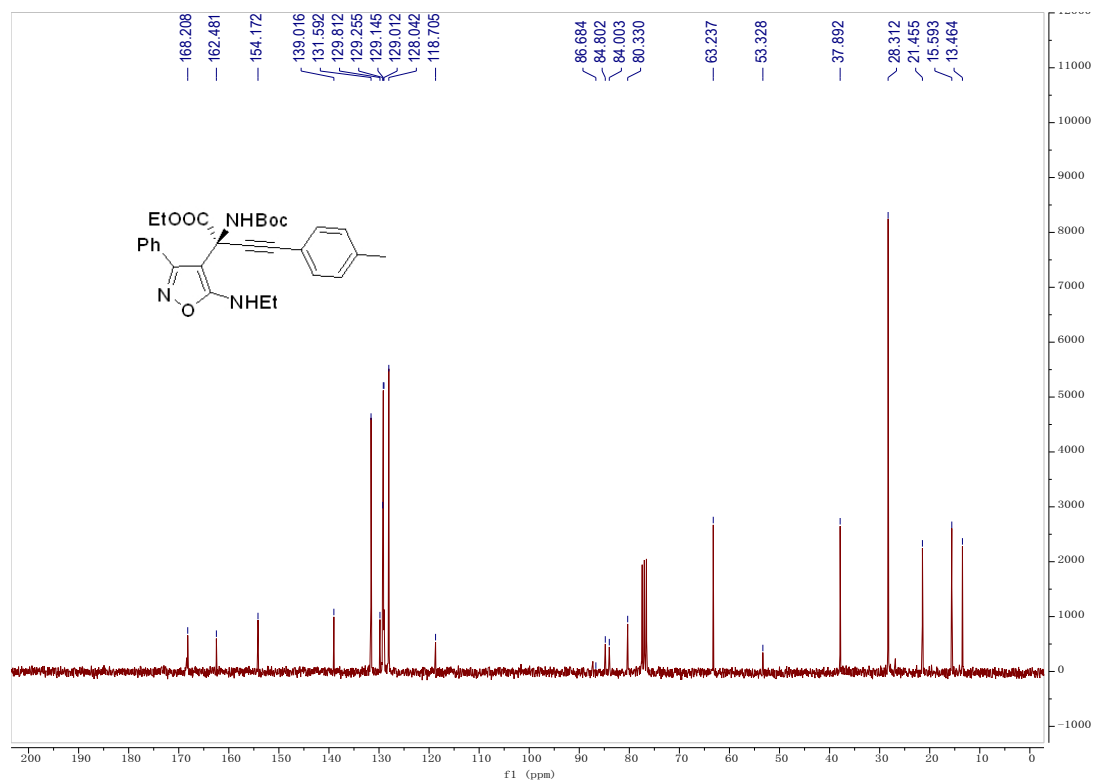

**Ethyl (S)-2-((*tert*-butoxycarbonyl)amino)-4-(2-chlorophenyl)-2-(5-(ethylamino)-3-phenylisoxazol-4-yl)but-3-ynoate (3ae)**

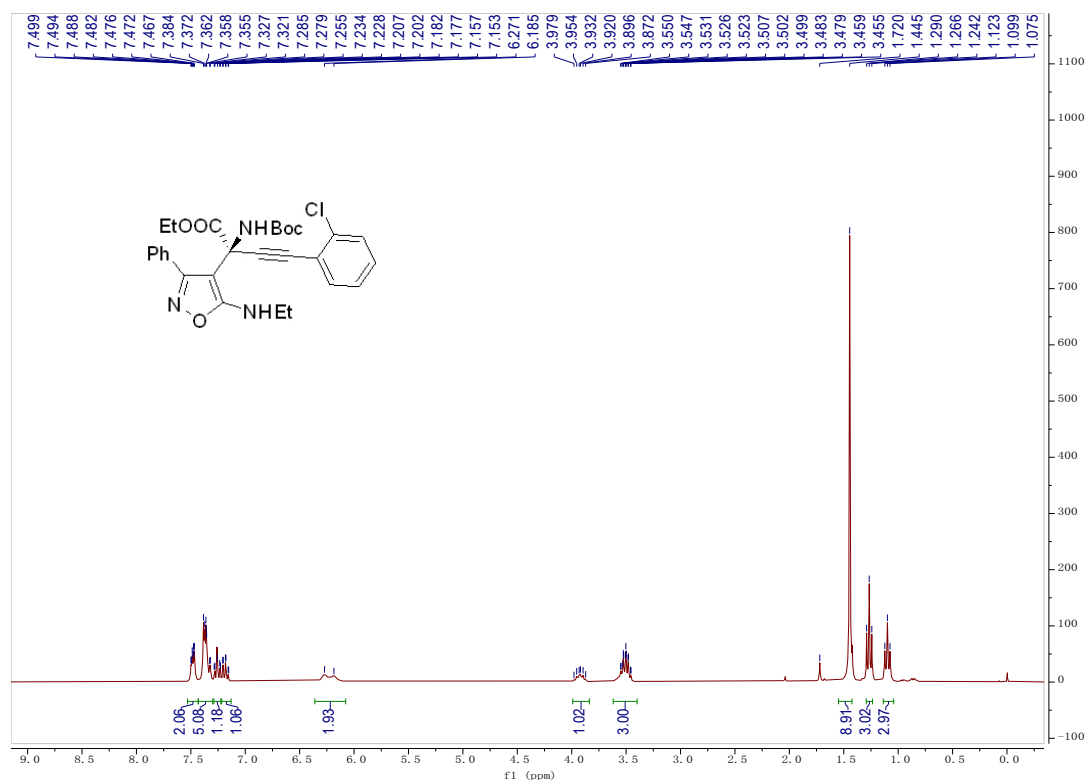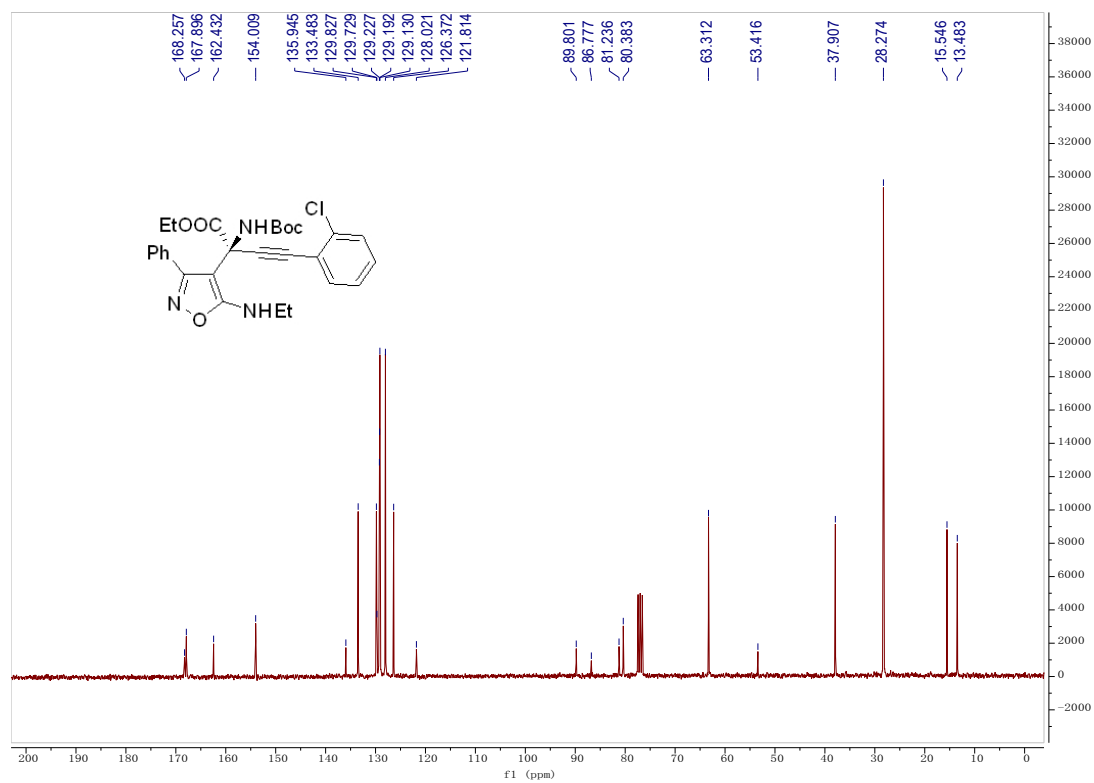

**Ethyl (S)-2-((*tert*-butoxycarbonyl)amino)-4-(3-chlorophenyl)-2-(5-(ethylamino)-3-phenylisoxazol-4-yl)but-3-ynoate (3af)**

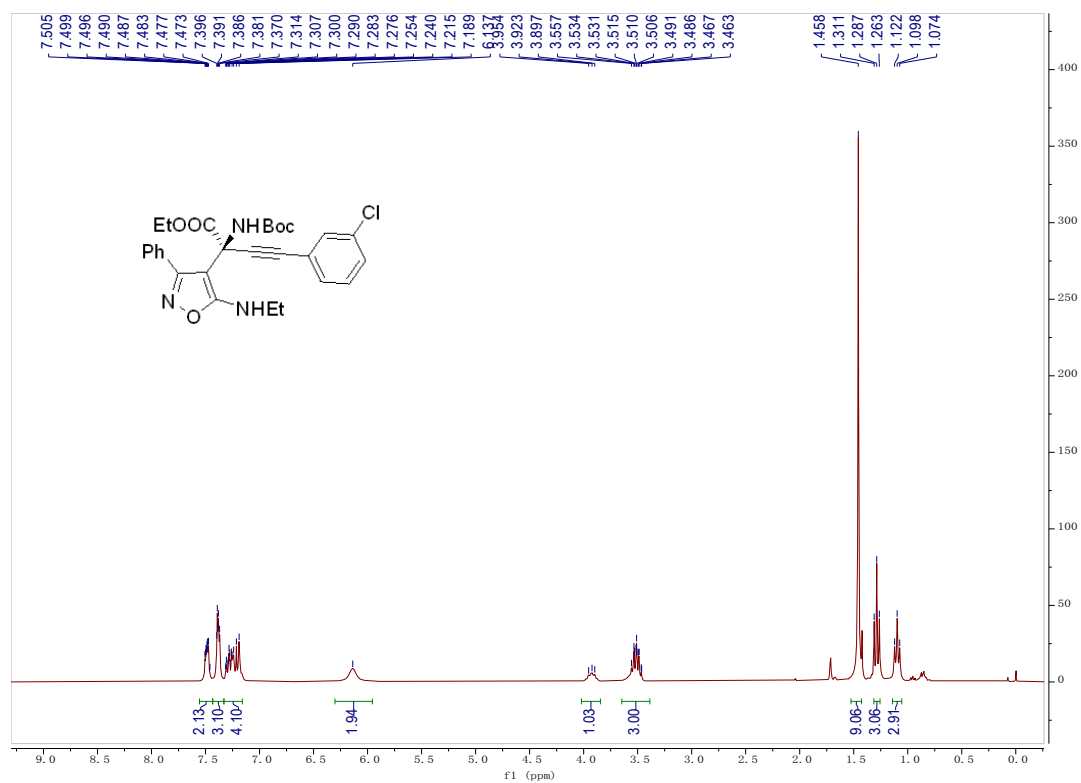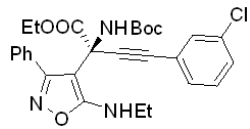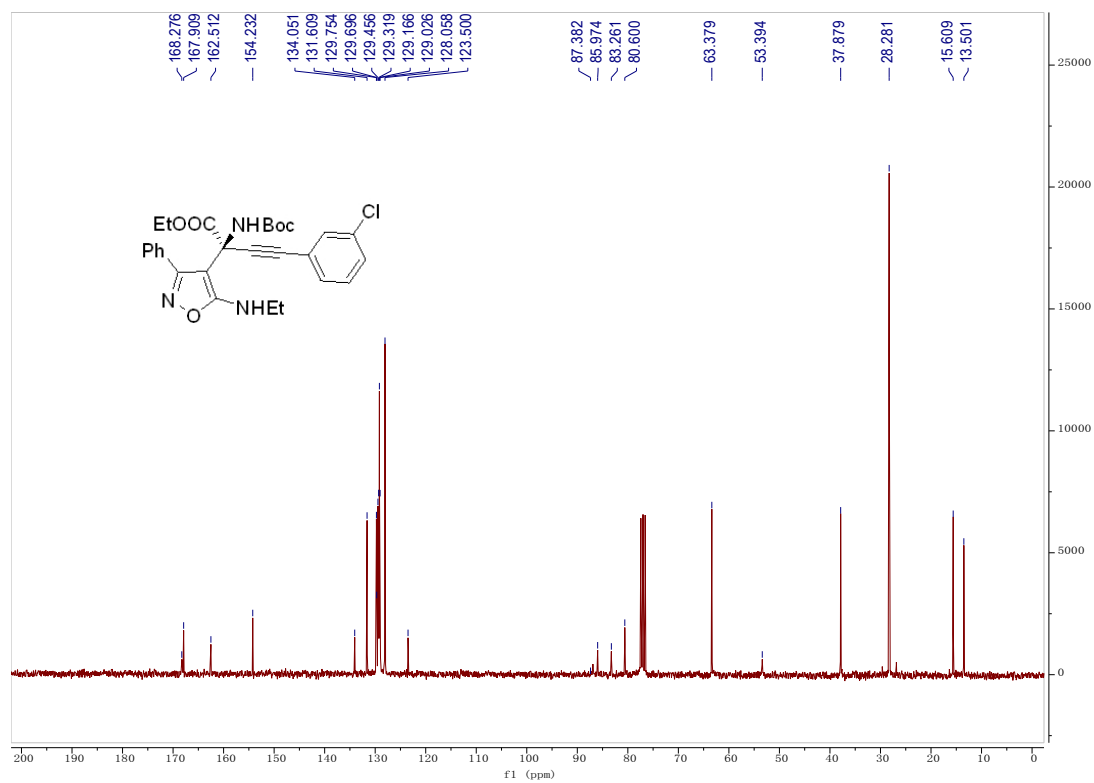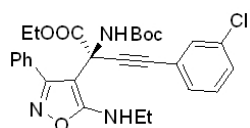



**Ethyl (S)-2-((tert-butoxycarbonyl)amino)-4-(4-chlorophenyl)-2-(5-(ethylamino)-3-phenylisoxazol-4-yl)but-3-ynoate (3ag)**

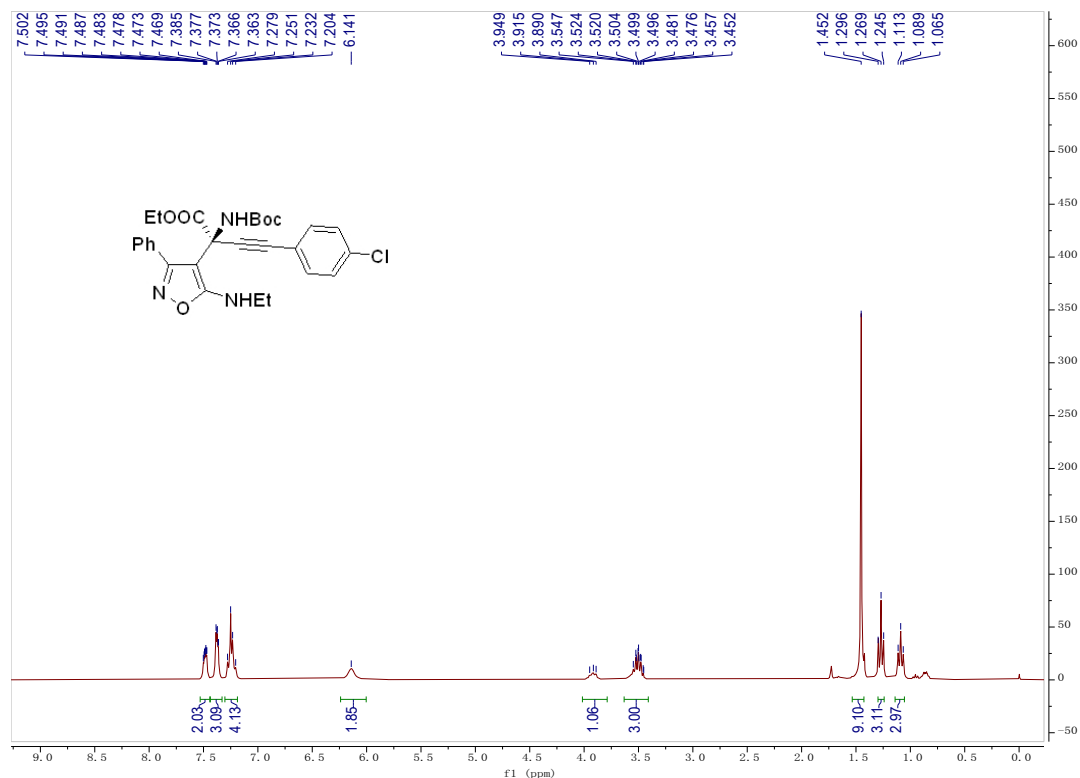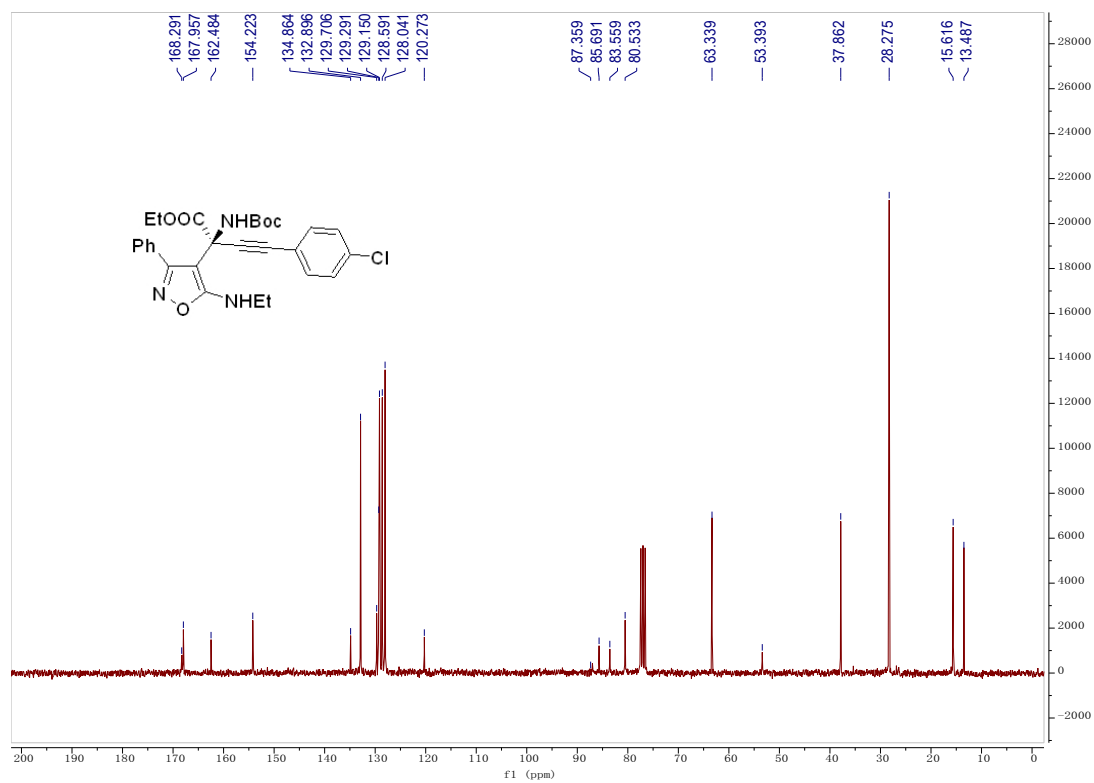

**Ethyl (S)-4-(4-bromophenyl)-2-((tert-butoxycarbonyl)amino)-2-(5-(ethylamino)-3-phenylisoxazol-4-yl)but-3-ynoate (3ah)**

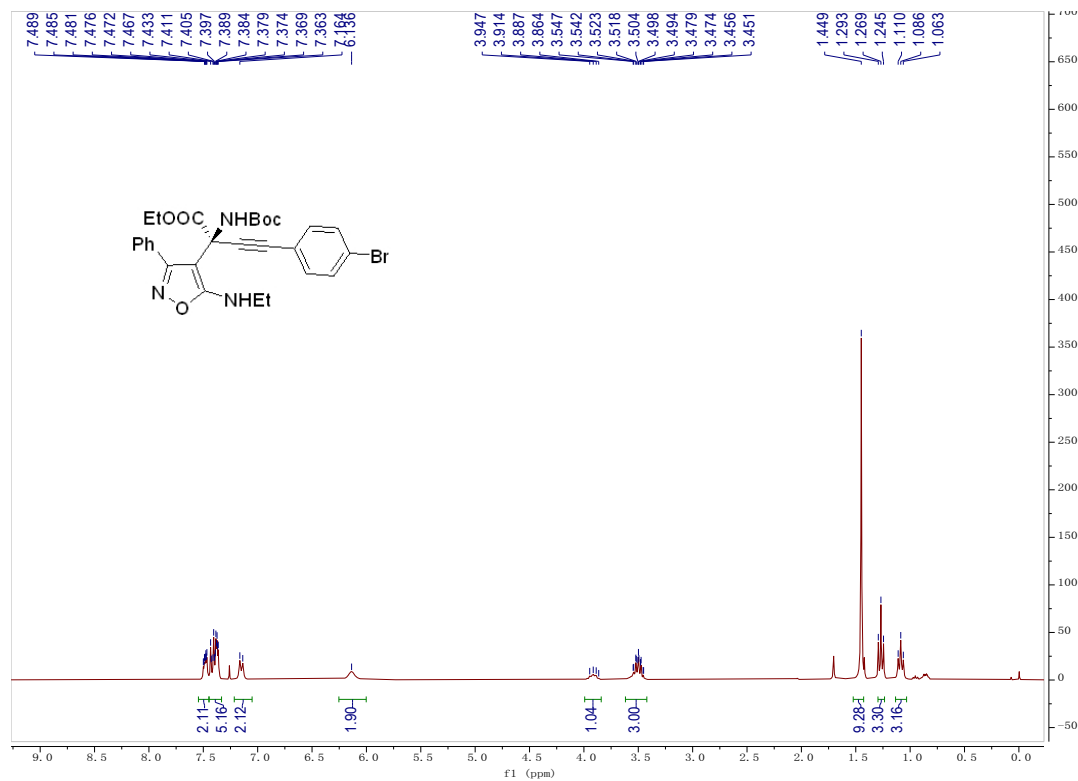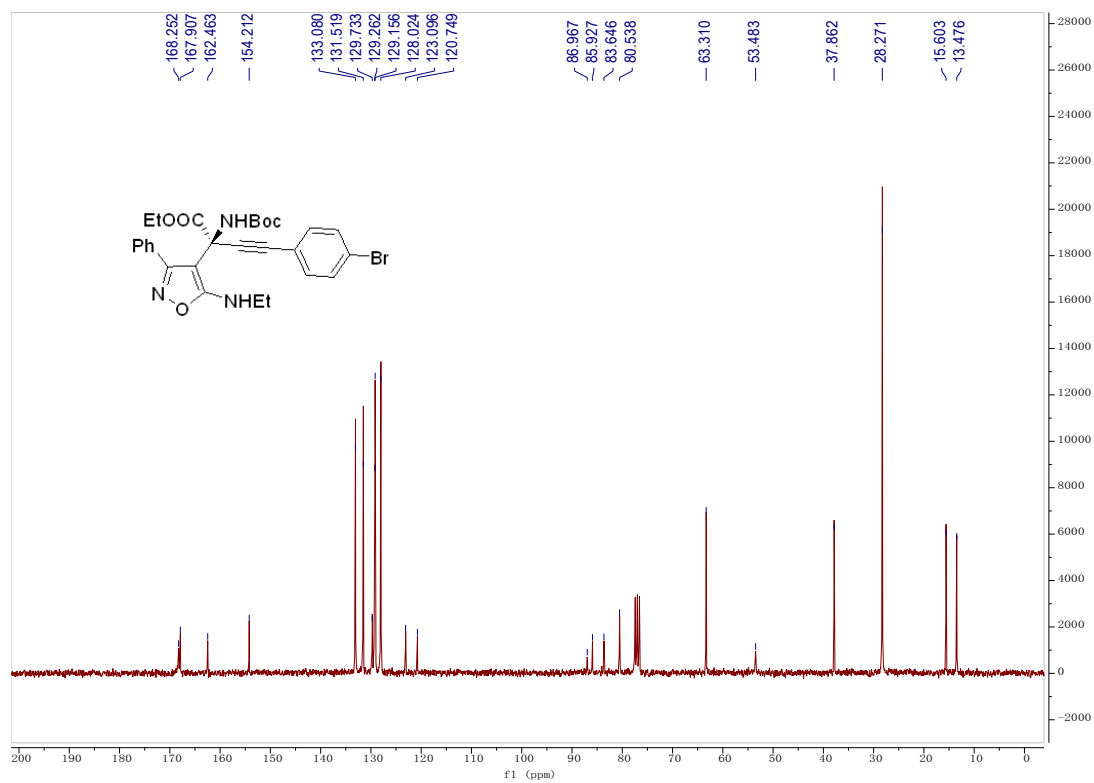

**Ethyl (S)-2-((*tert*-butoxycarbonyl)amino)-2-(5-(ethylamino)-3-phenylisoxazol-4-yl)-4-(4-fluorophenyl)but-3-ynoate (3ai)**

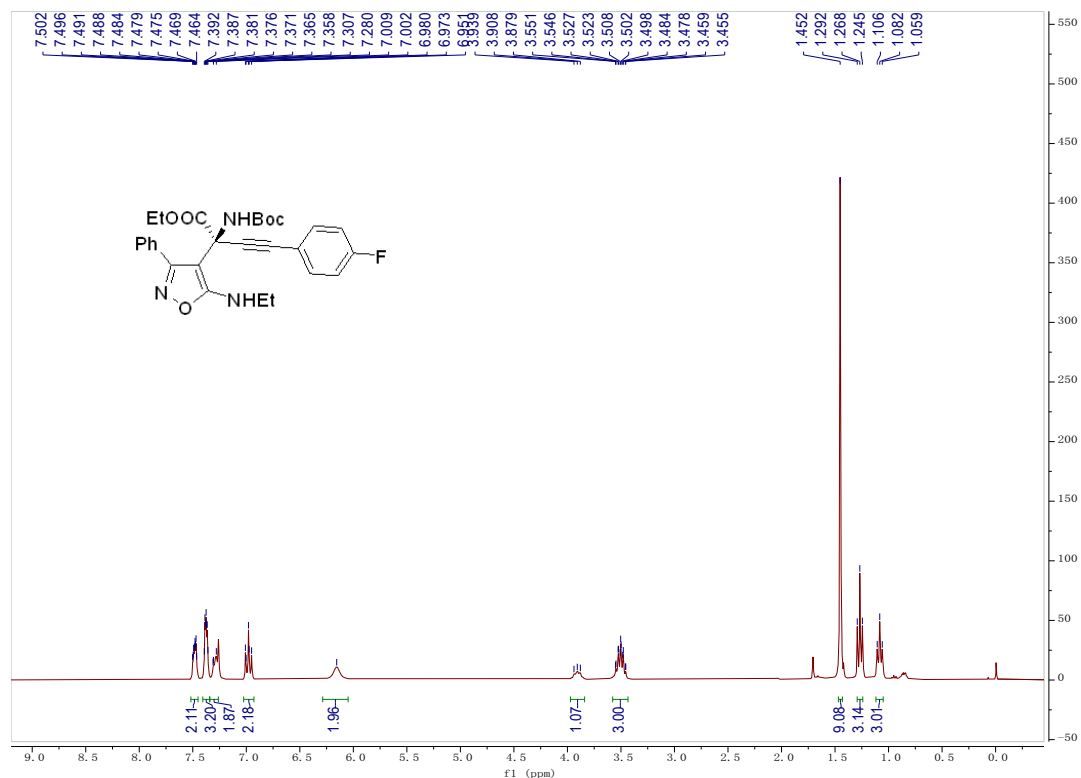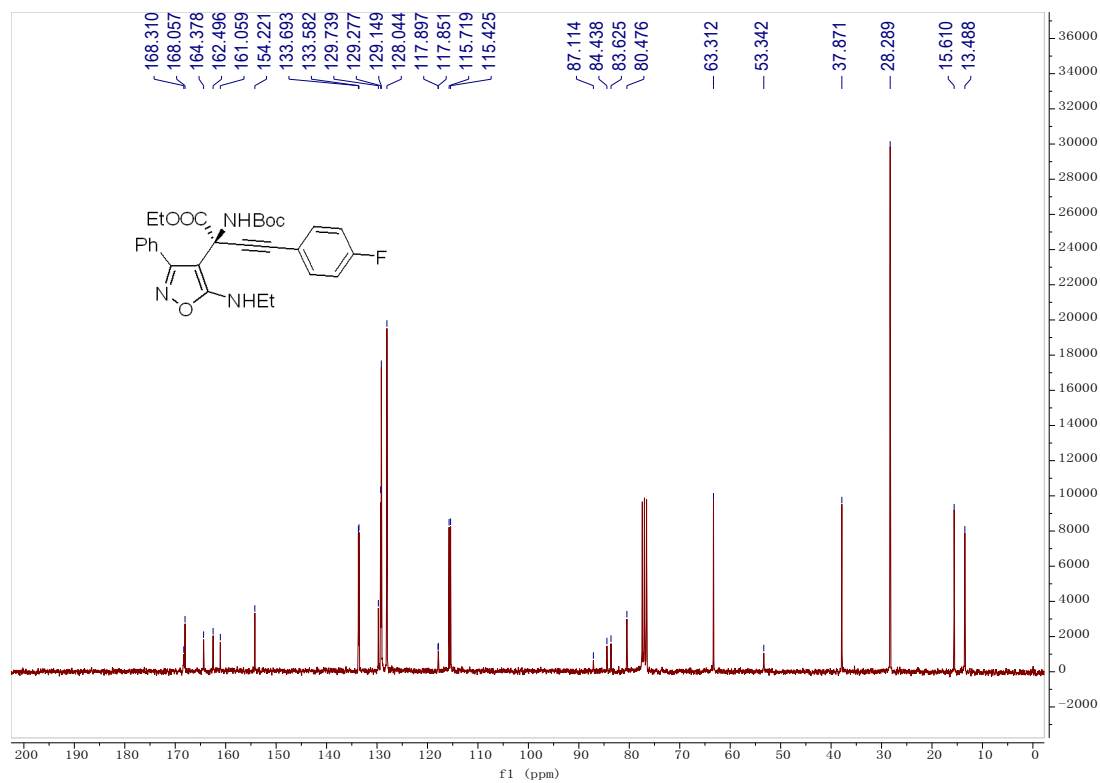

**Ethyl (S)-2-((tert-butoxycarbonyl)amino)-2-(5-(ethylamino)-3-phenylisoxazol-4-yl)-4-(4-(trifluoromethyl)phenyl)but-3-ynoate (3aj)**

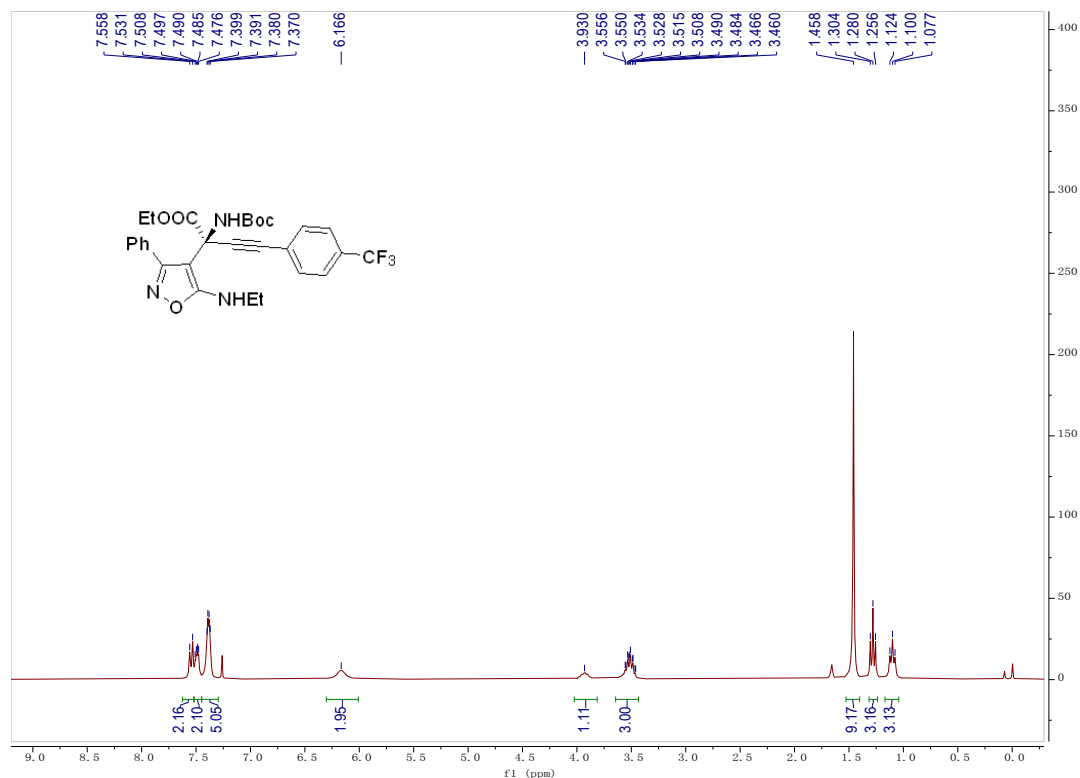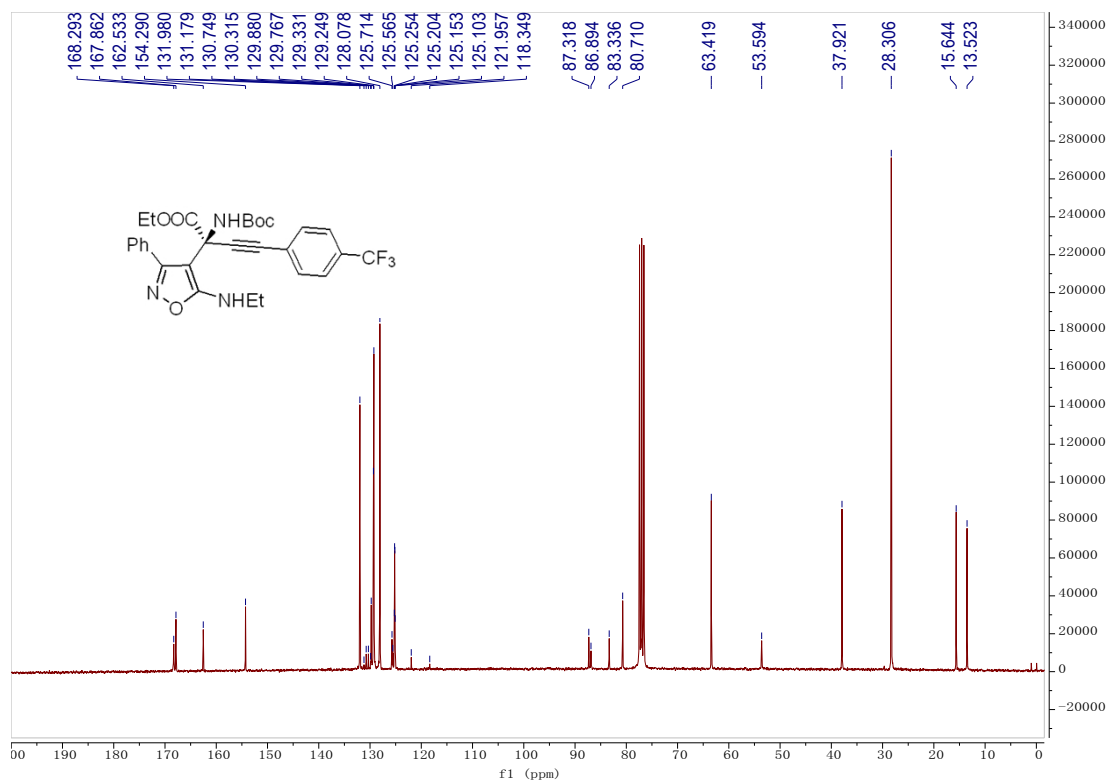

**Ethyl (S)-2-((tert-butoxycarbonyl)amino)-2-(5-(ethylamino)-3-phenylisoxazol-4-yl)-4-(thiophen-2-yl)but-3-ynoate (3ak)**

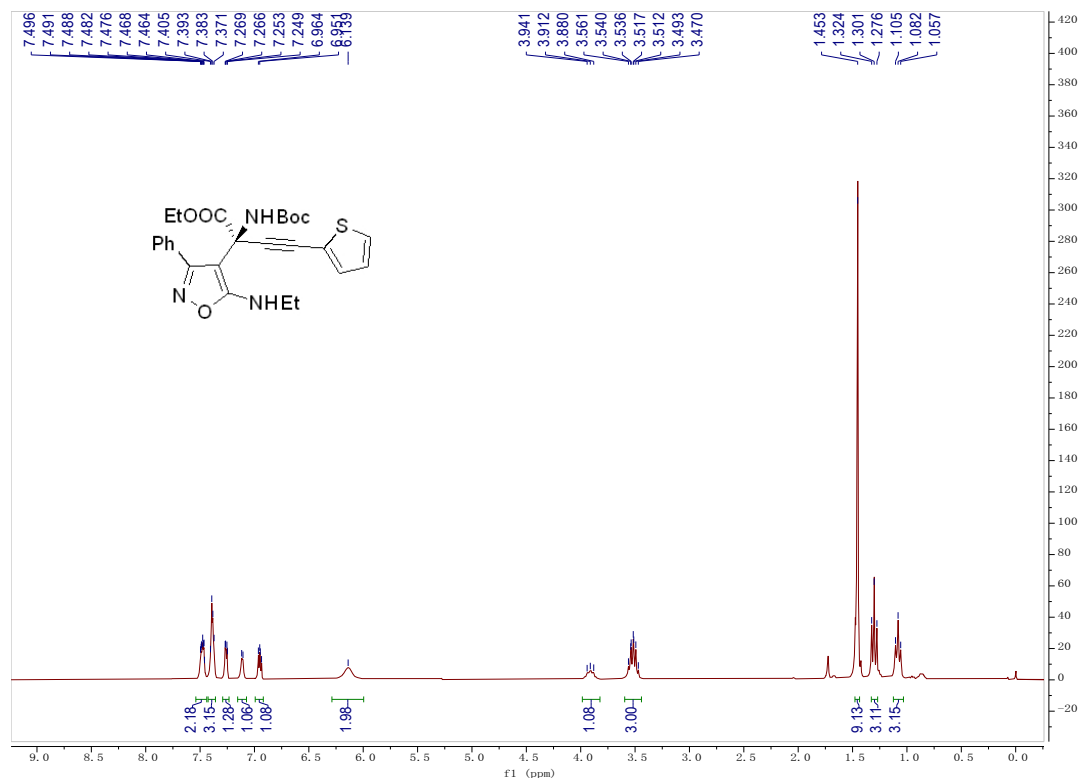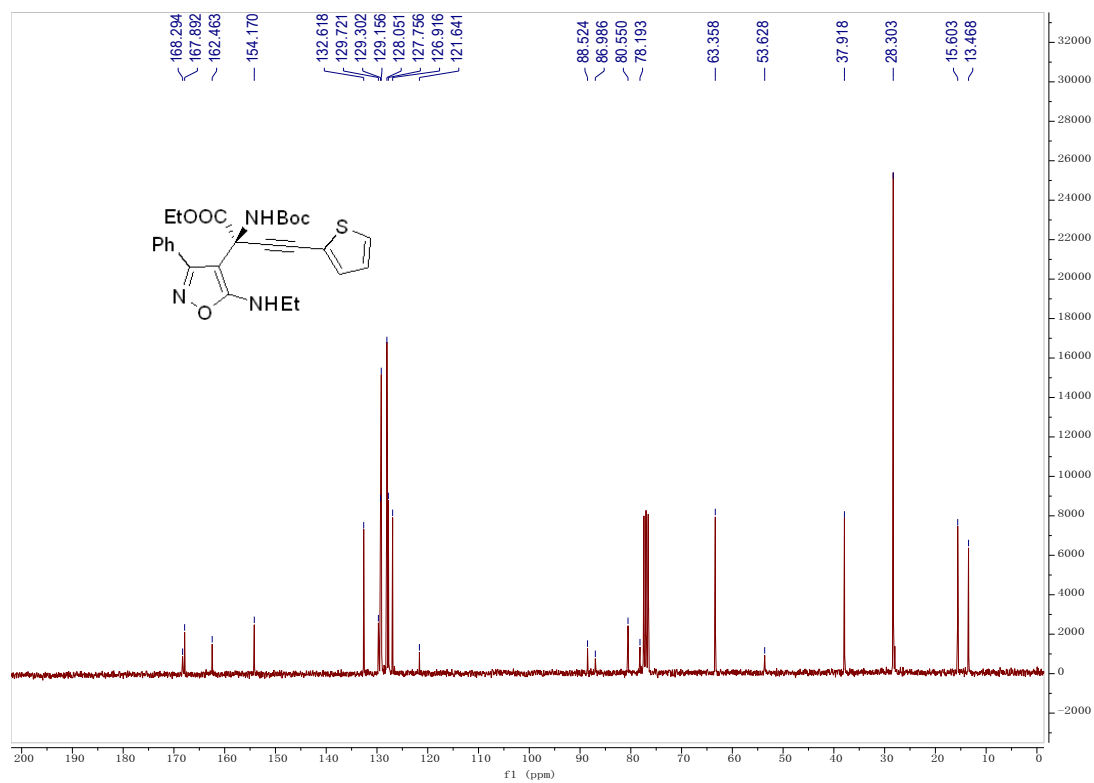

**Ethyl (S)-2-((tert-butoxycarbonyl)amino)-2-(5-(ethylamino)-3-phenylisoxazol-4-yl)-4-(naphthalen-2-yl)but-3-ynoate (3a)**

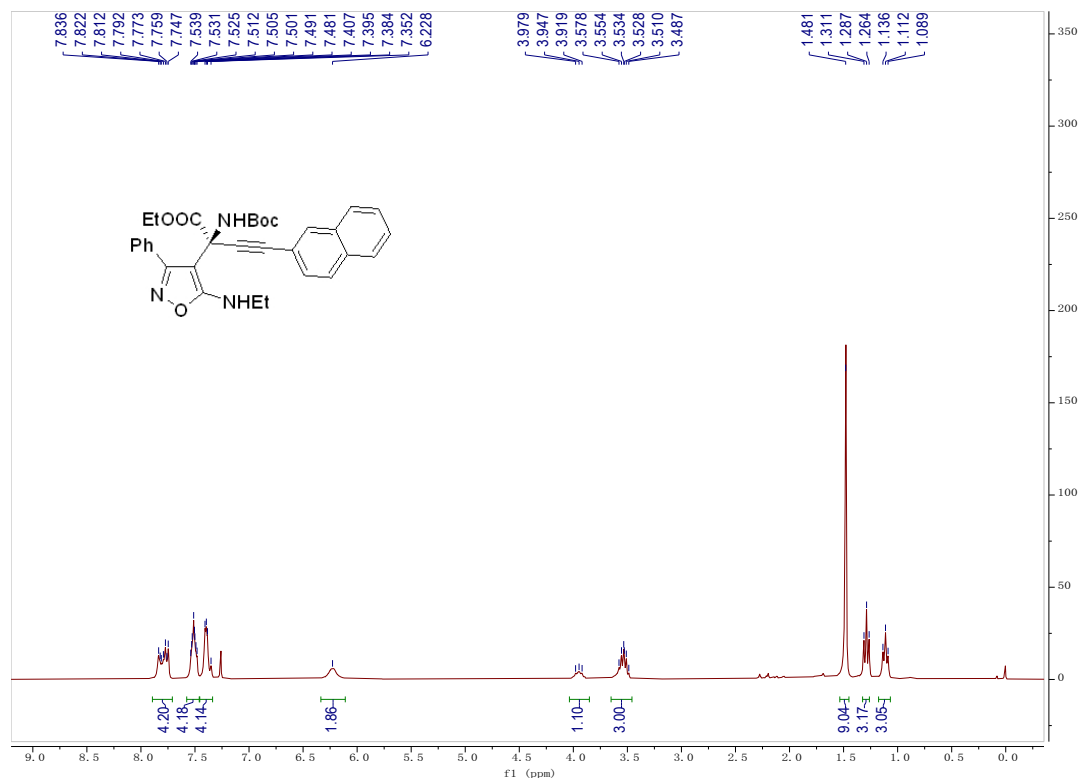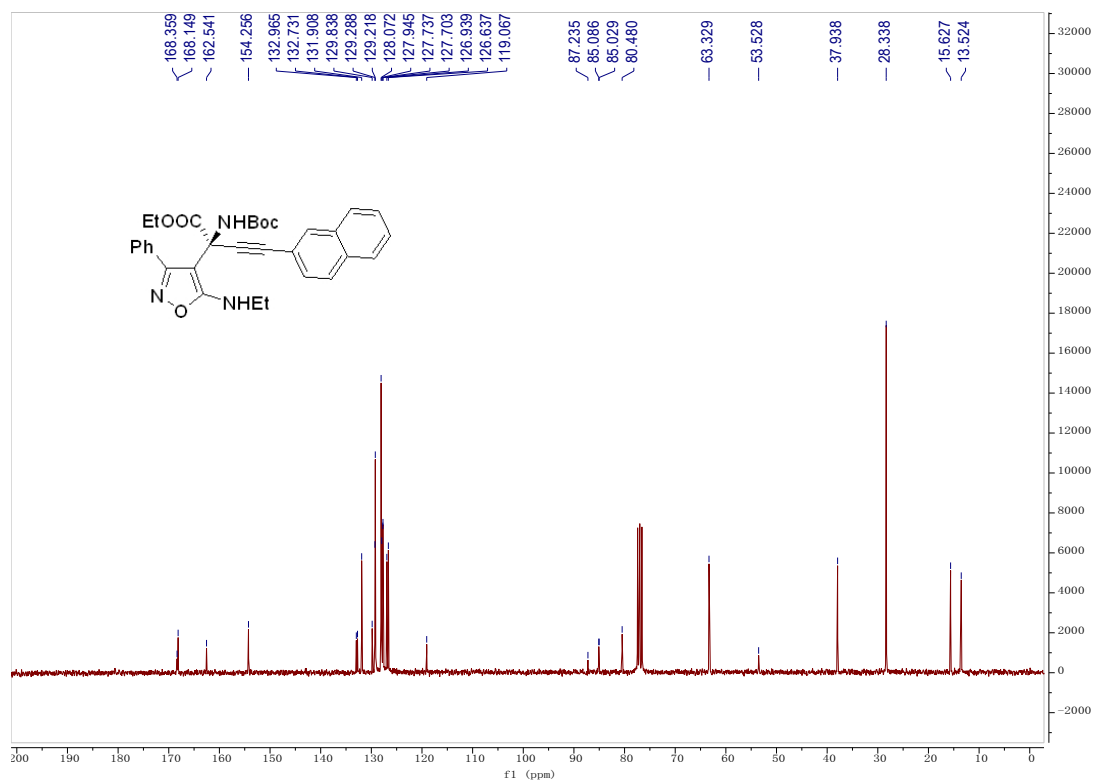

**Ethyl (*R*)-2-((*tert*-butoxycarbonyl)amino)-2-(5-(ethylamino)-3-phenylisoxazol-4-yl)-4-(triisopropylsilyl)but-3-ynoate (3am)**

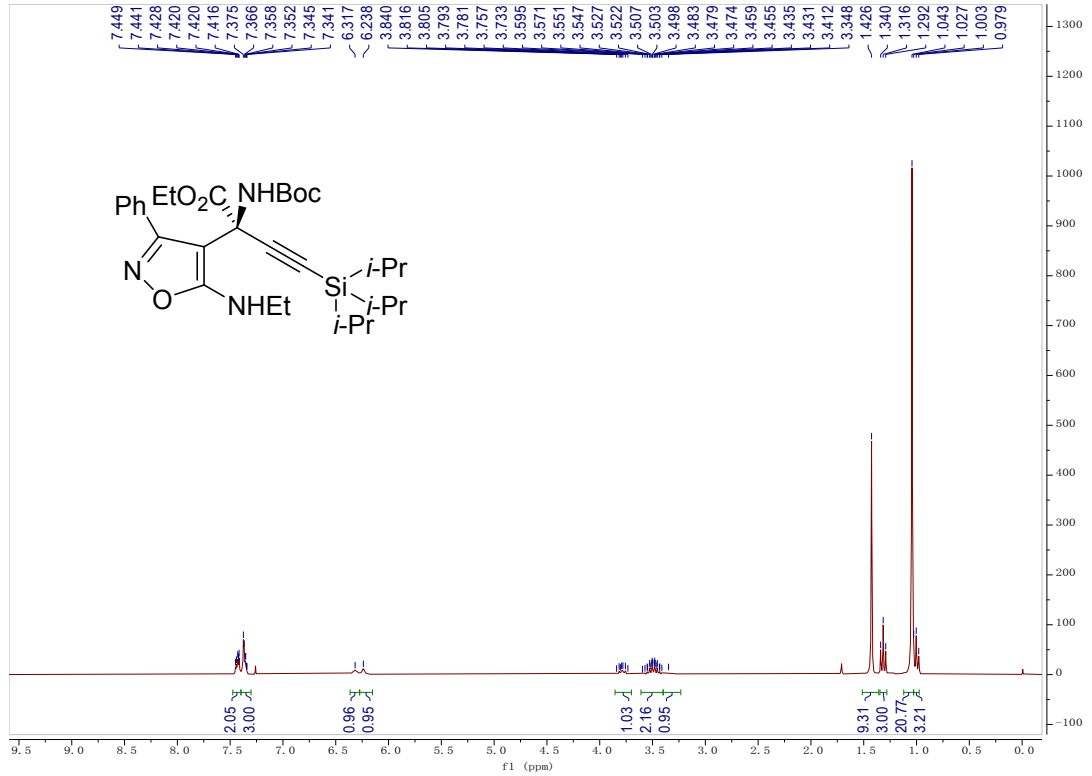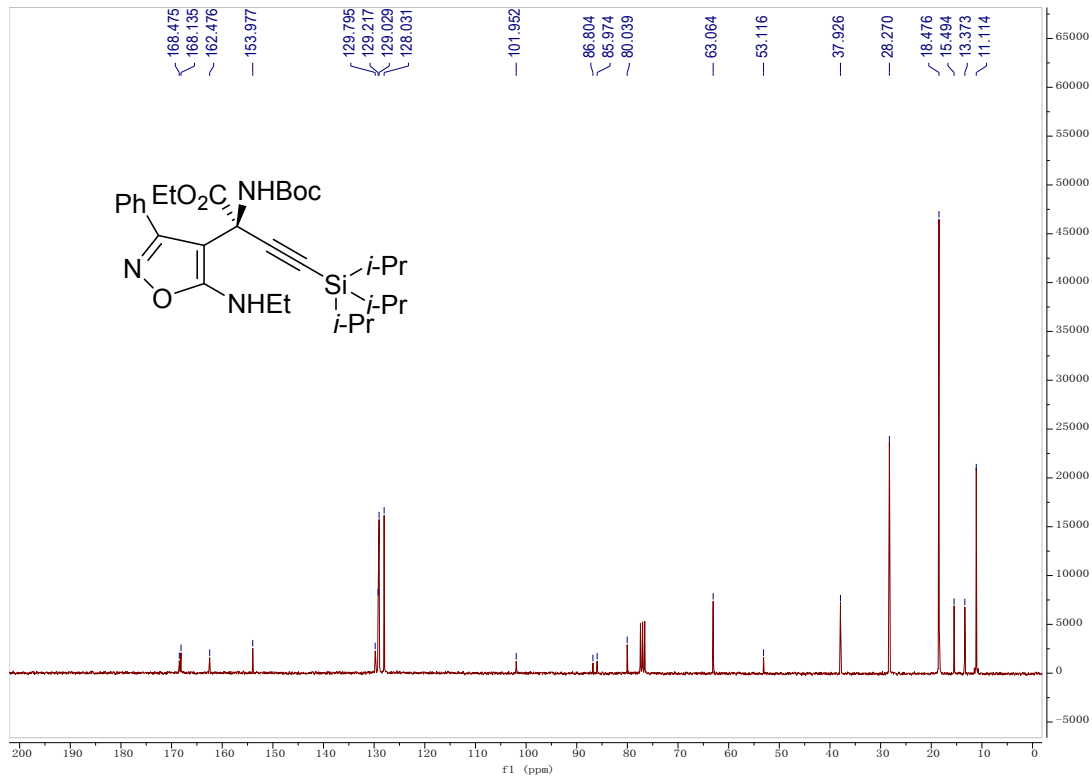

**Ethyl (S)-2-((*tert*-butoxycarbonyl)amino)-4-cyclopropyl-2-(5-(ethylamino)-3-phenylisoxazol-4-yl)but-3-ynoate (3an)**

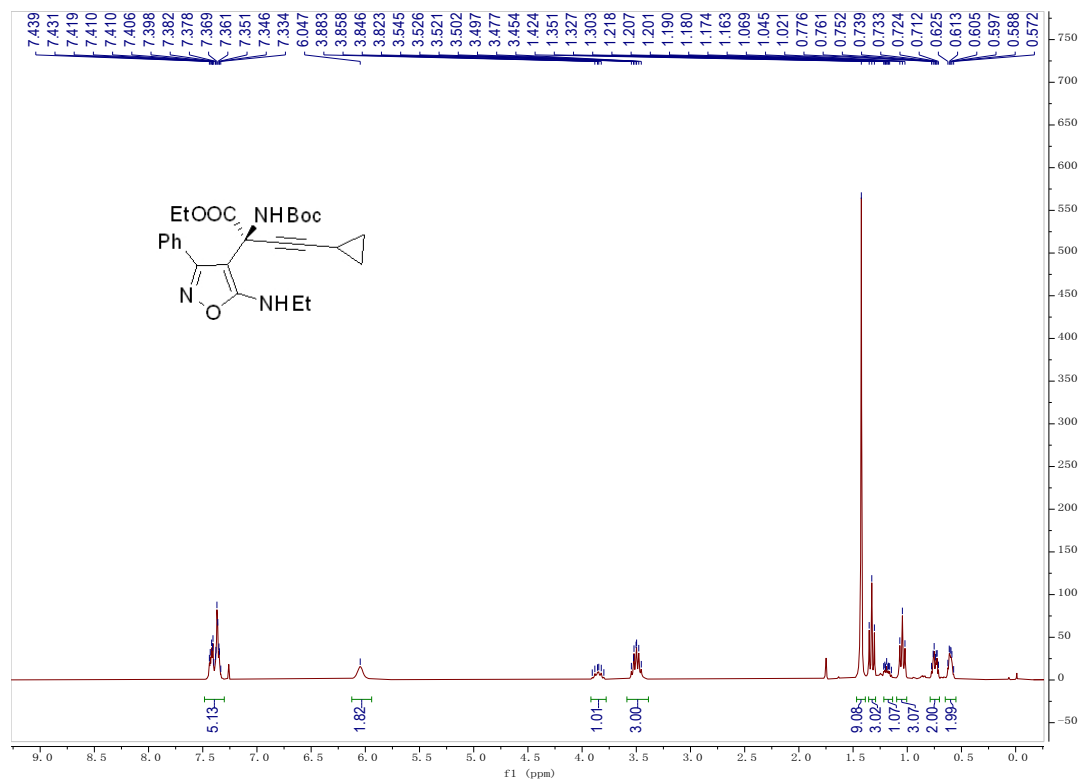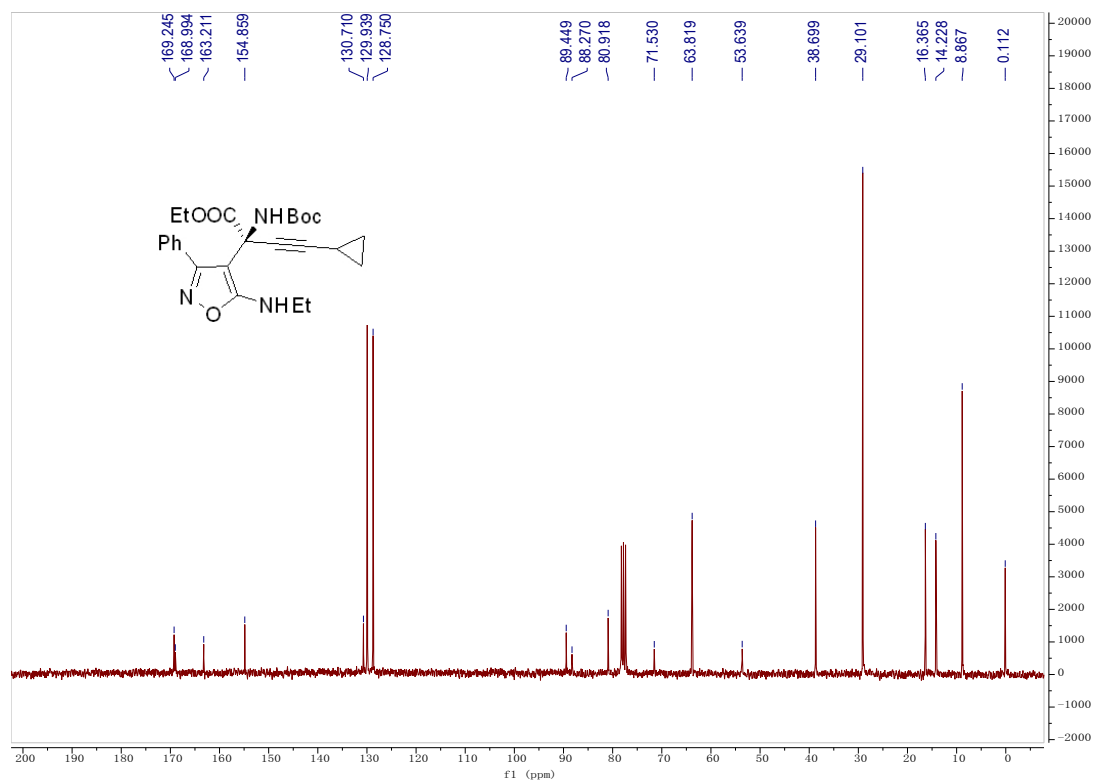



**Ethyl (S)-4-((*tert*-butoxycarbonyl)amino)-7-ethyl-5-iodo-3,6-diphenyl-4,7-dihydroisoxazolo[5,4-b]pyridine-4-carboxylate (4)**

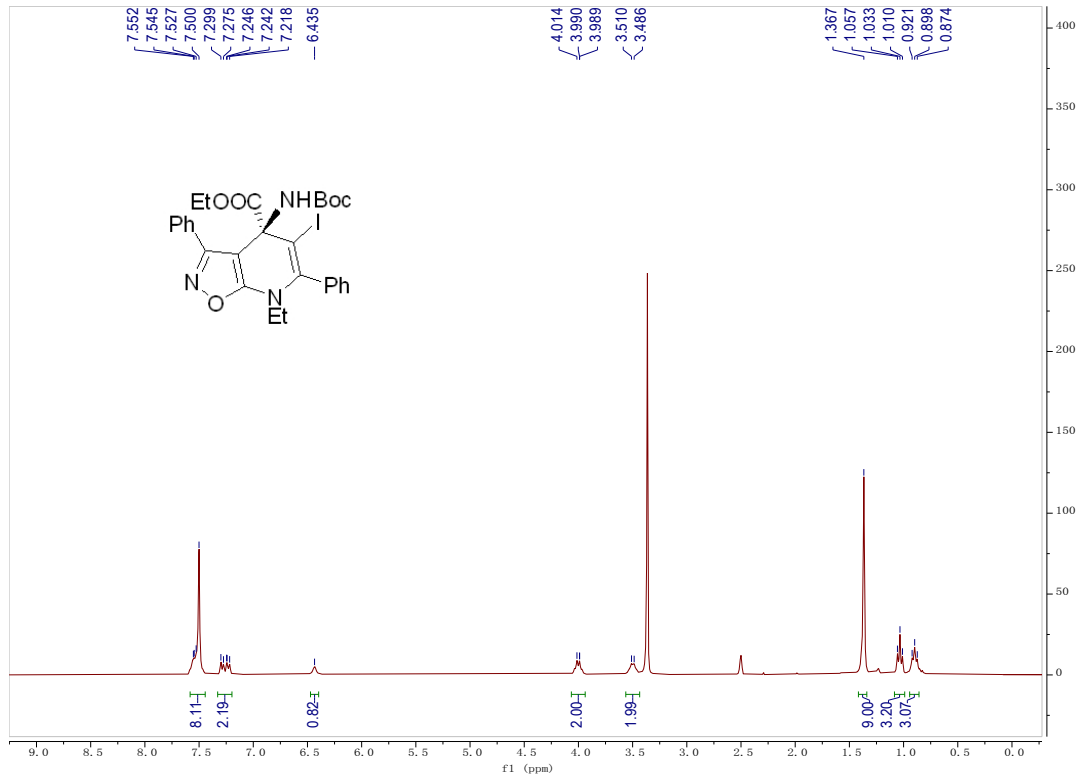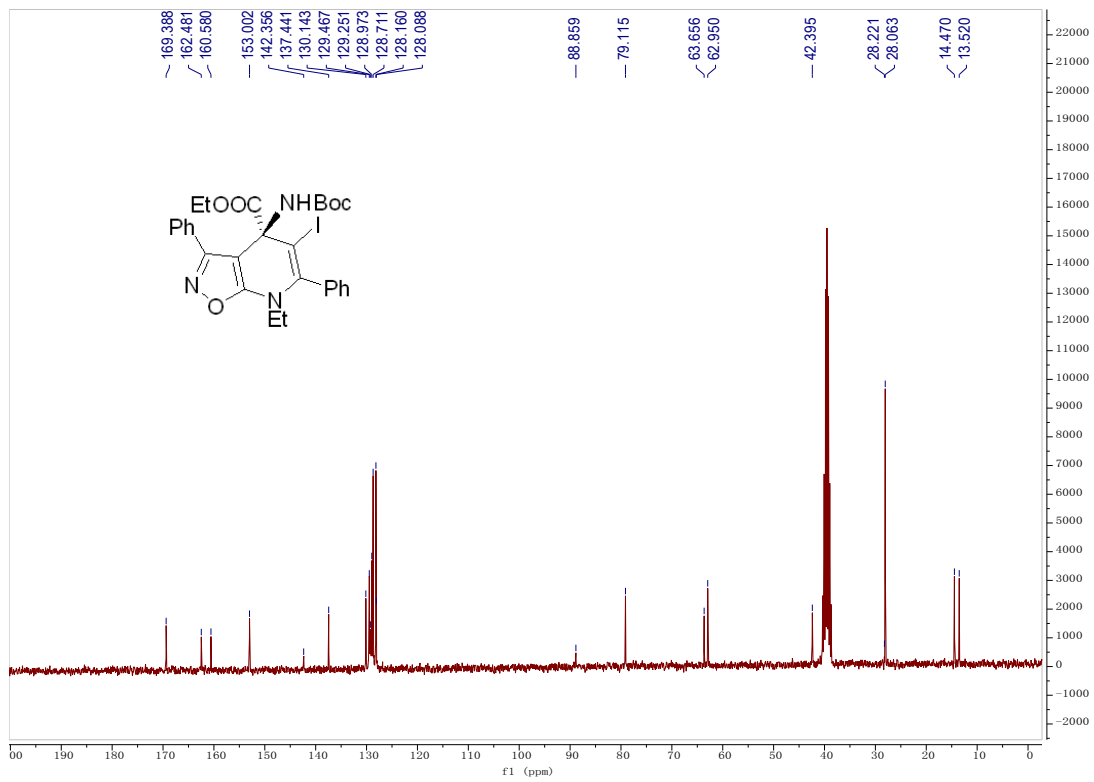

**Ethyl (S,Z)-2-((tert-butoxycarbonyl)amino)-2-(5-(ethylamino)-3-phenylisoxazol-4-yl)-4-phenylbut-3-enoate (5)**

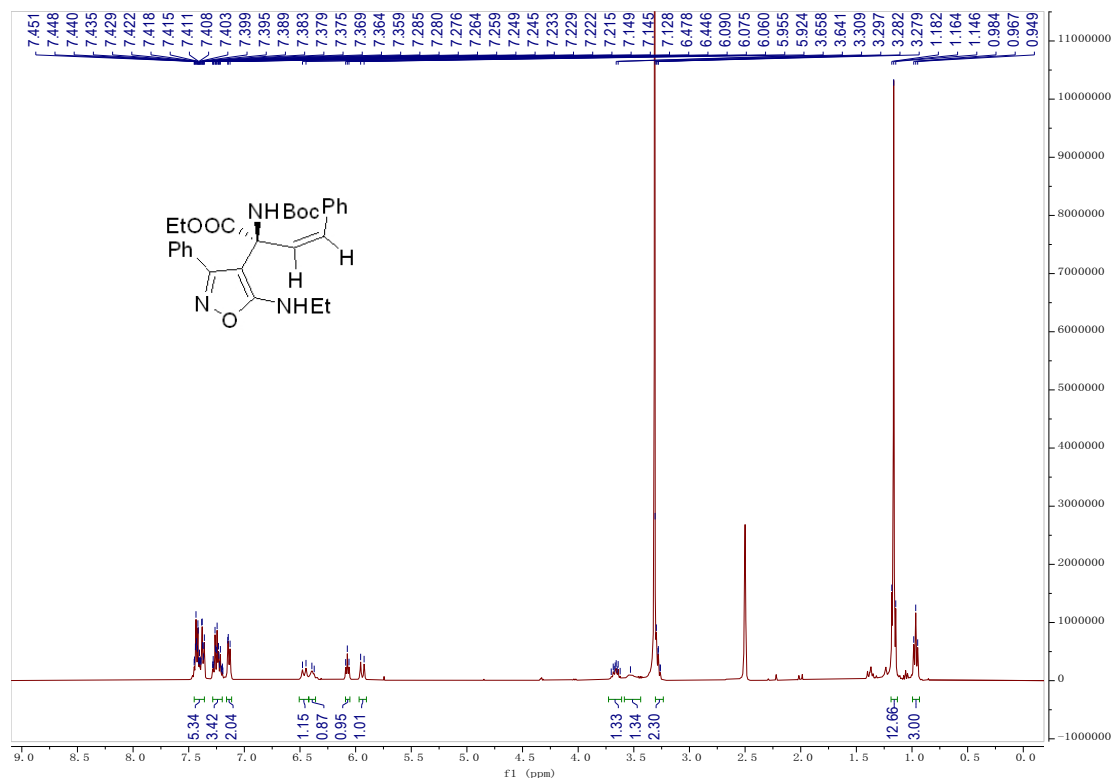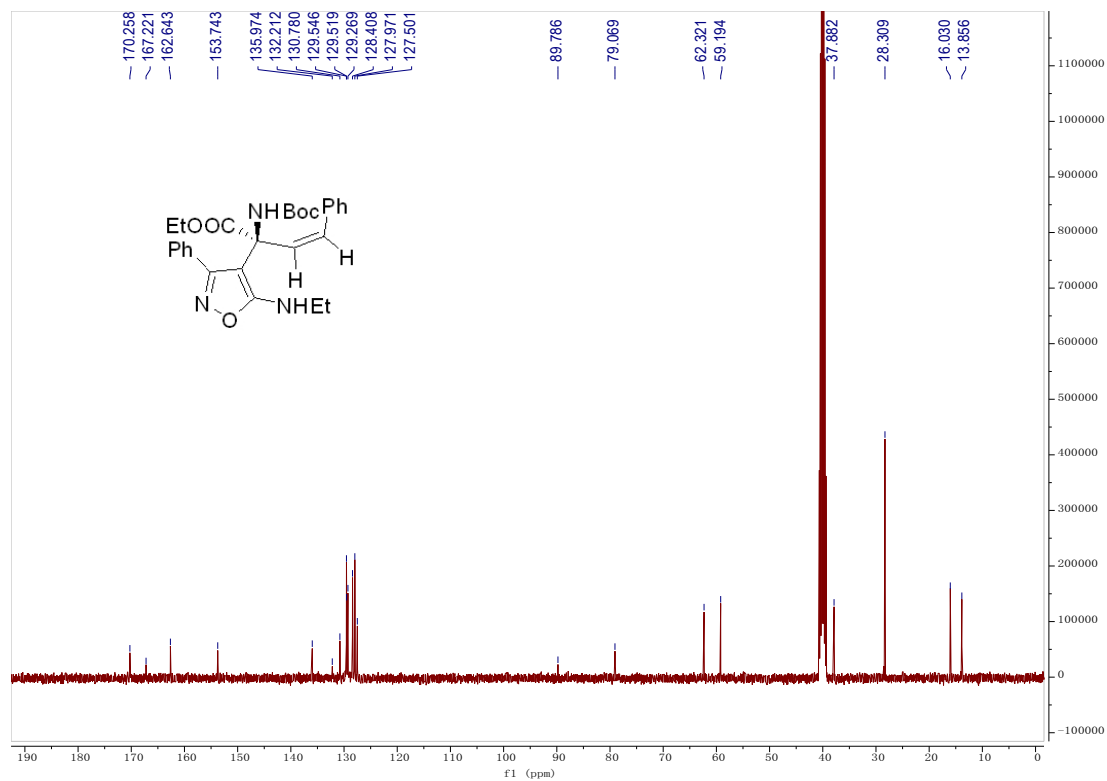

***tert*-butyl (*S*)-(2-(5-(ethylamino)-3-phenylisoxazol-4-yl)-1-hydroxy-4-phenylbut-3-yn-2-yl)carbamate (6)**

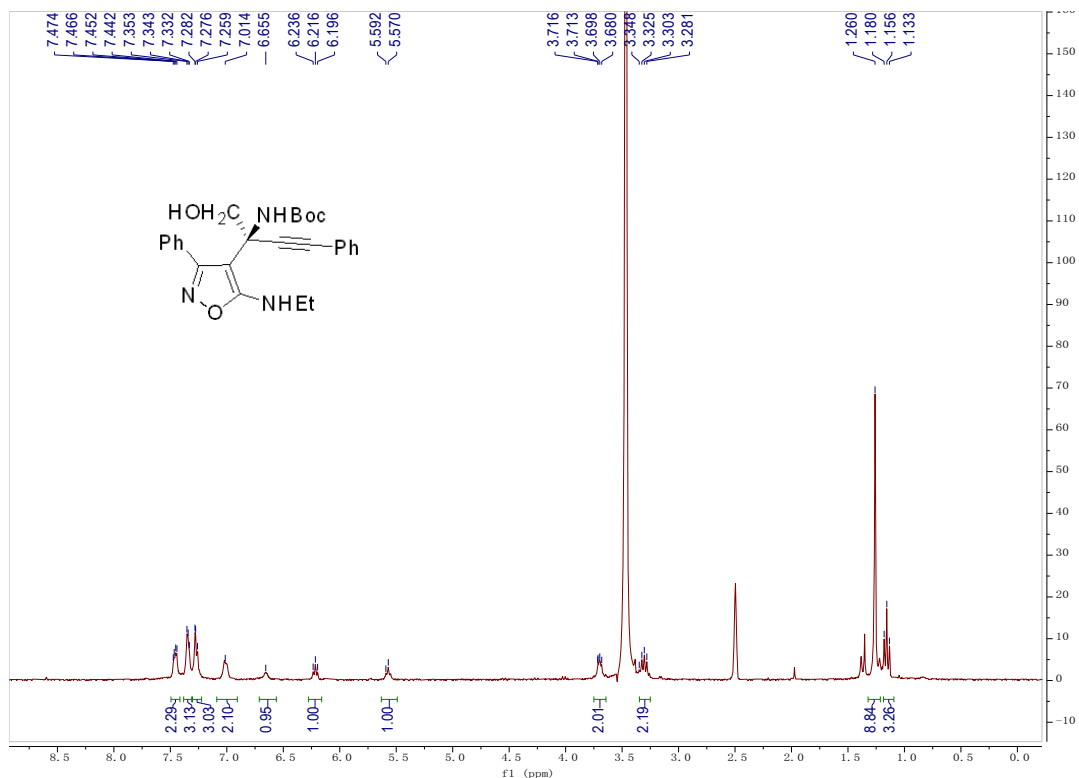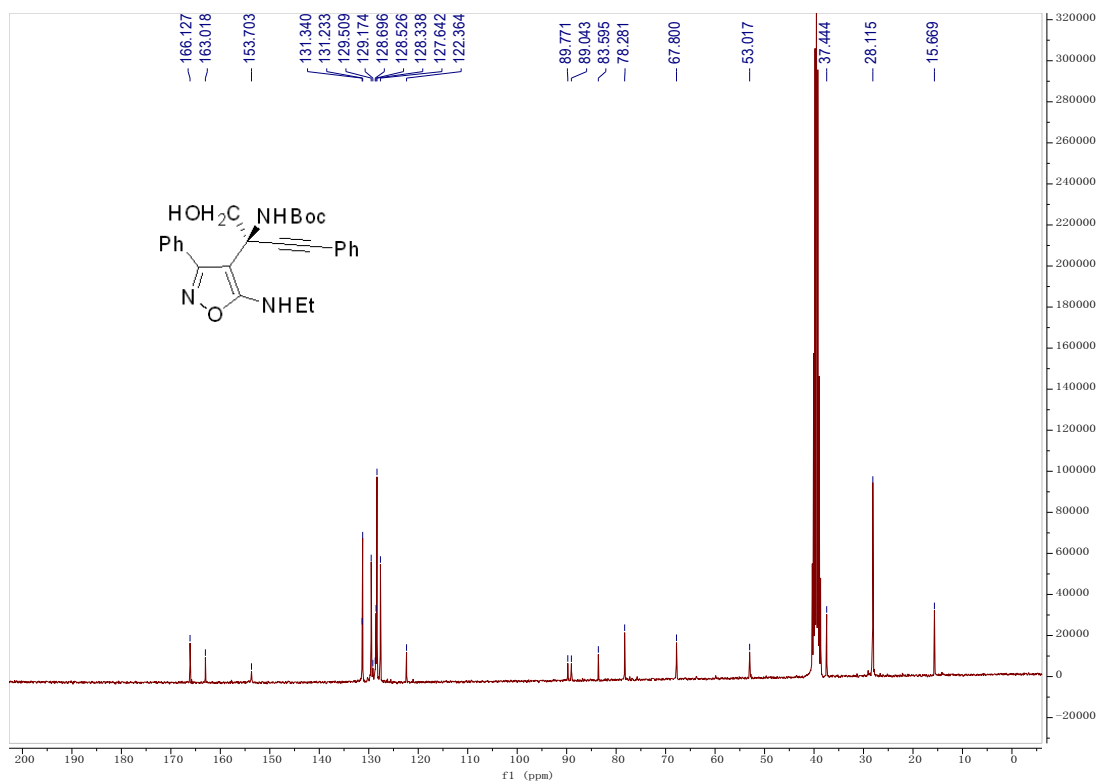

**Ethyl 2-((*tert*-butoxycarbonyl)amino)-2-(5-(ethylamino)-3-phenylisoxazol-4-yl)-2-(1-((2*S*,3*S*,5*R*)-2-(hydroxymethyl)-5-(5-methyl-2,4-dioxo-3,4-dihydropyrimidin-1(2*H*)-yl)tetrahydrofuran-3-yl)-1*H*-1,2,3-triazol-4-yl)acetate (8)**

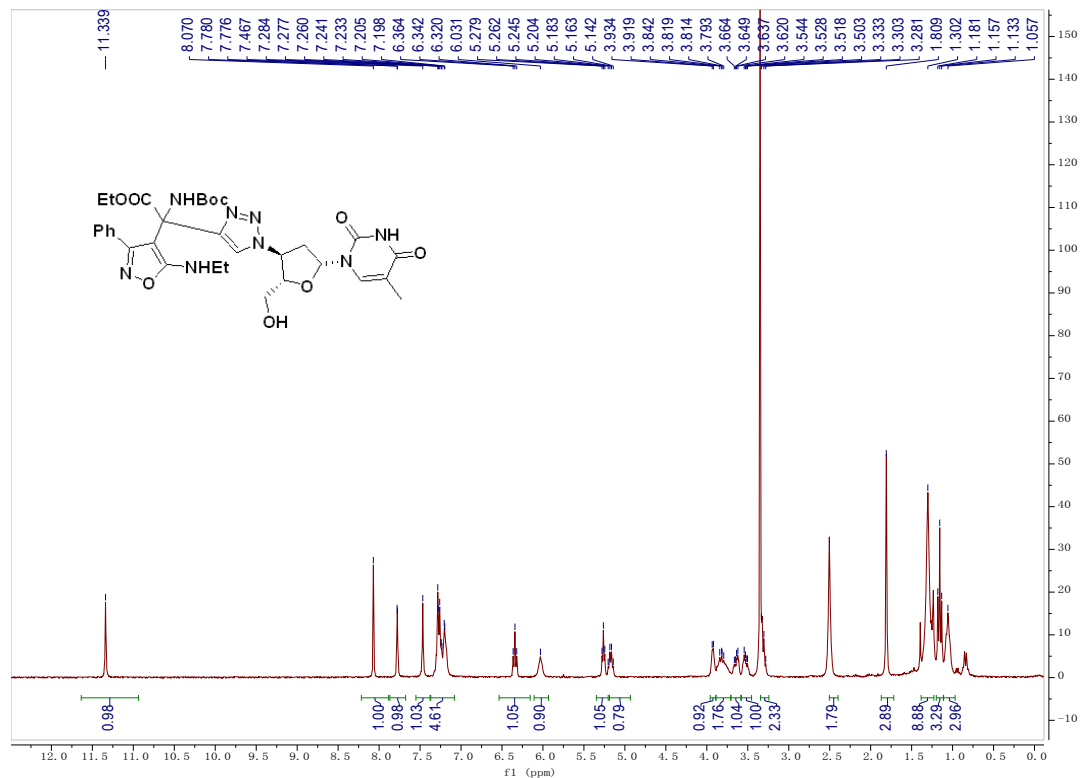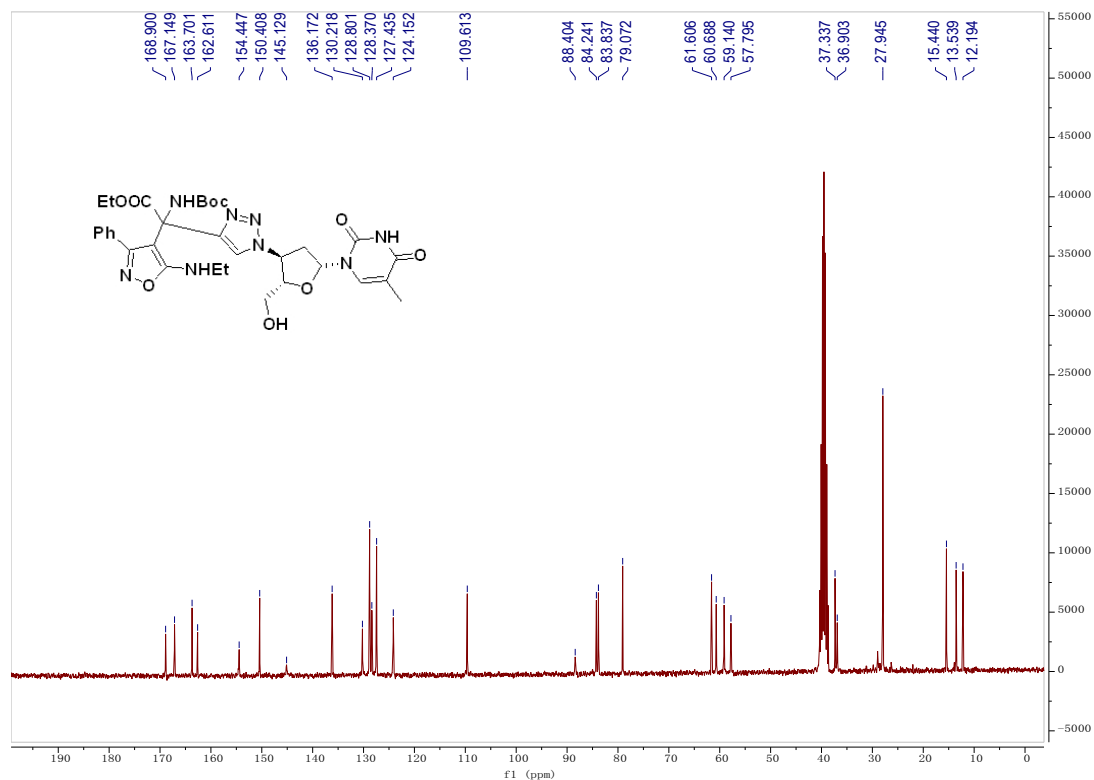

## 6. HPLC Charts of Products

### Ethyl (*S*)-2-((*tert*-butoxycarbonyl)amino)-2-(5-(ethylamino)-3-phenylisoxazol-4-yl)-4-phenylbut-3-ynoate (**3aa**)

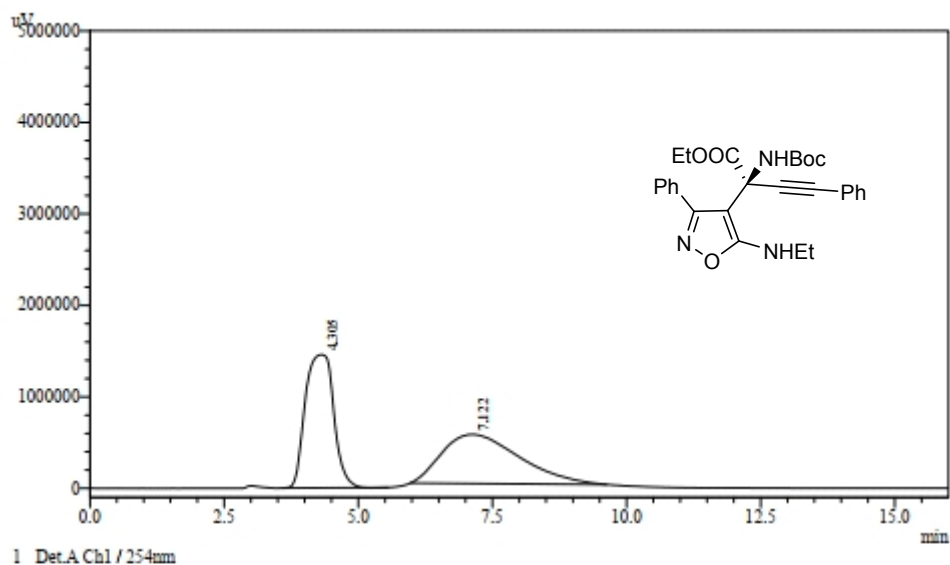

Detector A Ch1 254nm

| Peak# | Ret. Time | Area      | Height  | Area %  | Height % |
|-------|-----------|-----------|---------|---------|----------|
| 1     | 4.305     | 53715356  | 1455787 | 49.838  | 73.070   |
| 2     | 7.122     | 54063761  | 536522  | 50.162  | 26.930   |
| Total |           | 107779117 | 1992308 | 100.000 | 100.000  |

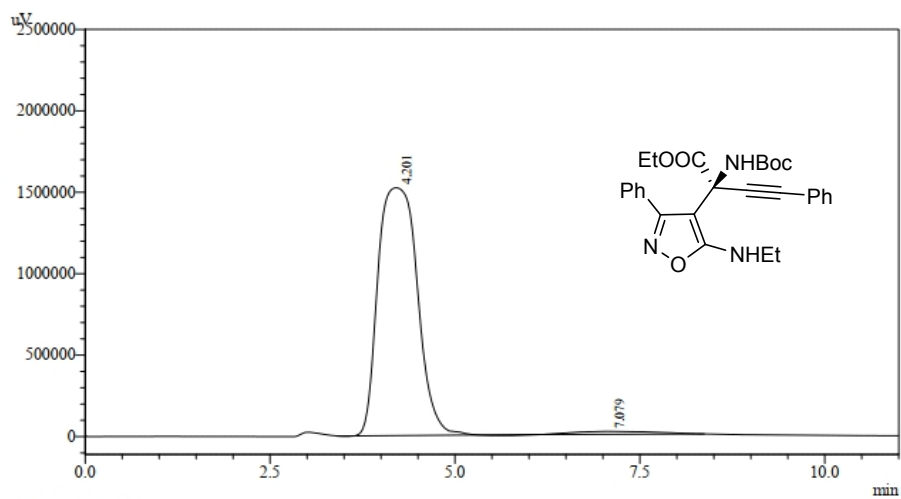

Detector A Ch1 254nm

| Peak# | Ret. Time | Area     | Height  | Area %  | Height % |
|-------|-----------|----------|---------|---------|----------|
| 1     | 4.201     | 56253191 | 1521237 | 97.540  | 98.815   |
| 2     | 7.079     | 1418770  | 18250   | 2.460   | 1.185    |
| Total |           | 57671961 | 1539487 | 100.000 | 100.000  |

**Ethyl (S)-2-((tert-butoxycarbonyl)amino)-2-(5-(ethylamino)-3-(4-methoxyphenyl)isoxazol-4-yl)-4-phenylbut-3-ynoate (3ba)**

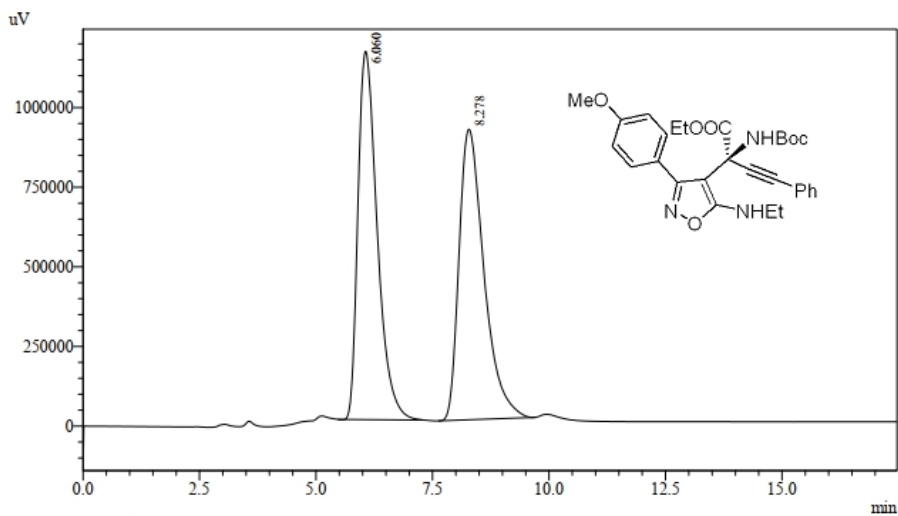

Detector A Ch1 254nm

| Peak# | Ret. Time | Area     | Height  | Area %  | Height % |
|-------|-----------|----------|---------|---------|----------|
| 1     | 6.060     | 33252687 | 1155896 | 49.548  | 55.901   |
| 2     | 8.278     | 33859690 | 911866  | 50.452  | 44.099   |
| Total |           | 67112377 | 2067762 | 100.000 | 100.000  |

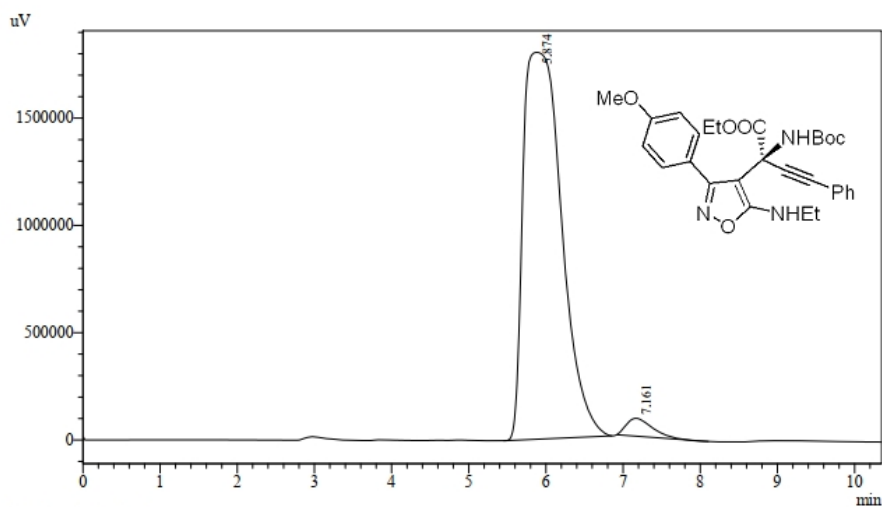

Detector A Ch1 254nm

| Peak# | Ret. Time | Area     | Height  | Area %  | Height % |
|-------|-----------|----------|---------|---------|----------|
| 1     | 5.874     | 62626802 | 1803226 | 96.987  | 95.591   |
| 2     | 7.161     | 1945871  | 83169   | 3.013   | 4.409    |
| Total |           | 64572673 | 1886395 | 100.000 | 100.000  |

**Ethyl (*S*)-2-((*tert*-butoxycarbonyl)amino)-2-(5-(ethylamino)-3-(4-fluorophenyl)isoxazol-4-yl)-4-phenylbut-3-ynoate (3ca)**

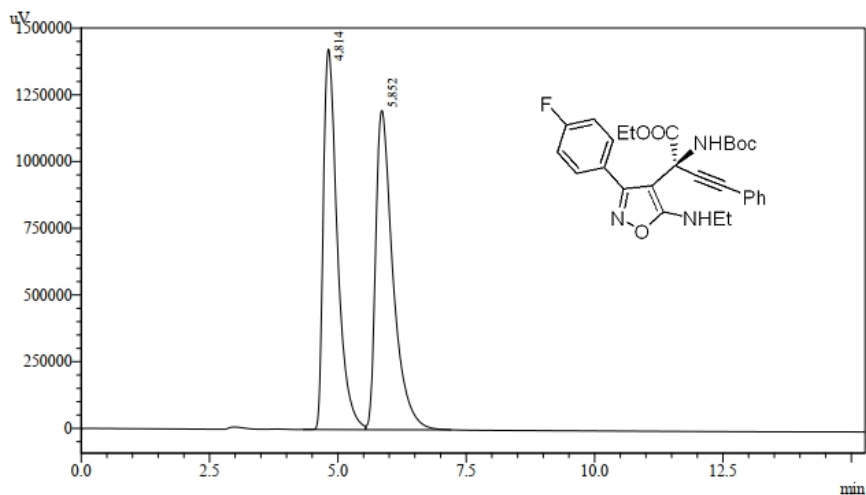

1 Det.A Ch1 / 254nm

Detector A Ch1 254nm

| Peak# | Ret. Time | Area     | Height  | Area %  | Height % |
|-------|-----------|----------|---------|---------|----------|
| 1     | 4.814     | 27209407 | 1425297 | 49.227  | 54.365   |
| 2     | 5.852     | 28064324 | 1196402 | 50.773  | 45.635   |
| Total |           | 55273731 | 2621699 | 100.000 | 100.000  |

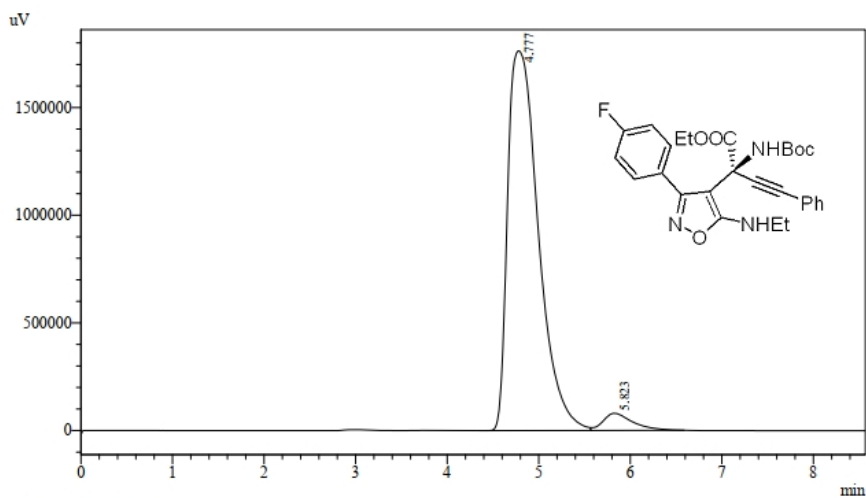

1 Det.A Ch1 / 254nm

Detector A Ch1 254nm

| Peak# | Ret. Time | Area     | Height  | Area %  | Height % |
|-------|-----------|----------|---------|---------|----------|
| 1     | 4.777     | 41128318 | 1762858 | 95.816  | 95.672   |
| 2     | 5.823     | 1796047  | 79746   | 4.184   | 4.328    |
| Total |           | 42924365 | 1842604 | 100.000 | 100.000  |

**Ethyl (S)-2-(3-(4-bromophenyl)-5-(ethylamino)isoxazol-4-yl)-2-((tert-butoxycarbonyl)amino)-4-phenylbut-3-ynoate (3da)**

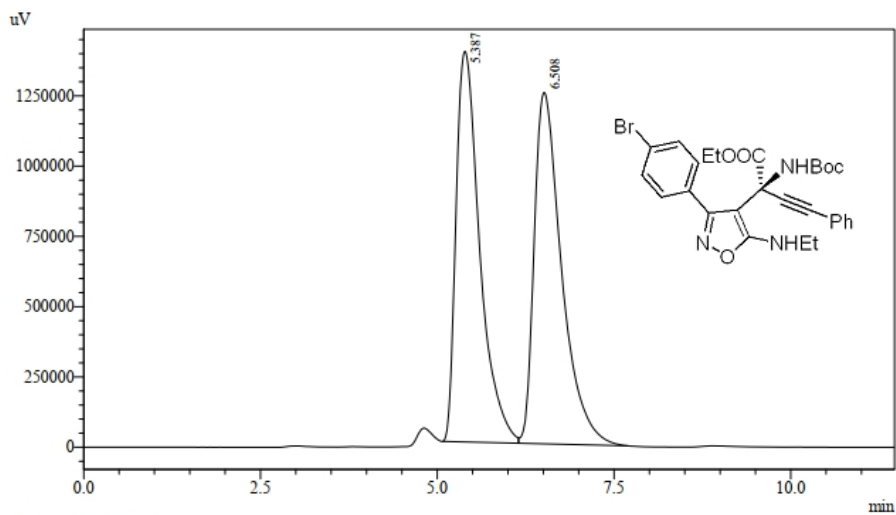

1 Det.A Ch1 / 254nm

Detector A Ch1 254nm

| Peak# | Ret. Time | Area     | Height  | Area %  | Height % |
|-------|-----------|----------|---------|---------|----------|
| 1     | 5.387     | 32437980 | 1389399 | 49.026  | 52.648   |
| 2     | 6.508     | 33726825 | 1249634 | 50.974  | 47.352   |
| Total |           | 66164805 | 2639033 | 100.000 | 100.000  |

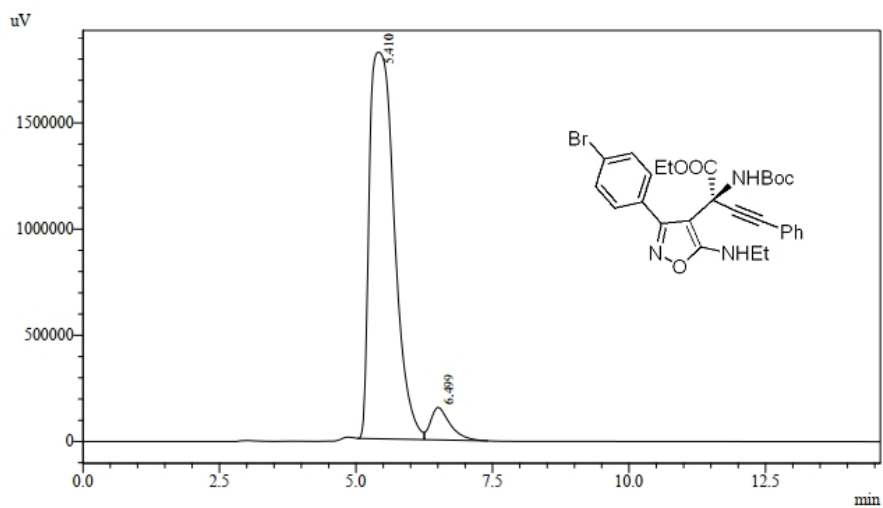

1 Det.A Ch1 / 254nm

Detector A Ch1 254nm

| Peak# | Ret. Time | Area     | Height  | Area %  | Height % |
|-------|-----------|----------|---------|---------|----------|
| 1     | 5.410     | 57932818 | 1819835 | 93.850  | 92.261   |
| 2     | 6.499     | 3796038  | 152659  | 6.150   | 7.739    |
| Total |           | 61728856 | 1972494 | 100.000 | 100.000  |



**Ethyl (S)-2-((*tert*-butoxycarbonyl)amino)-2-(3-(2-chlorophenyl)-5-(ethylamino)isoxazol-4-yl)-4-phenylbut-3-ynoate (3ea)**

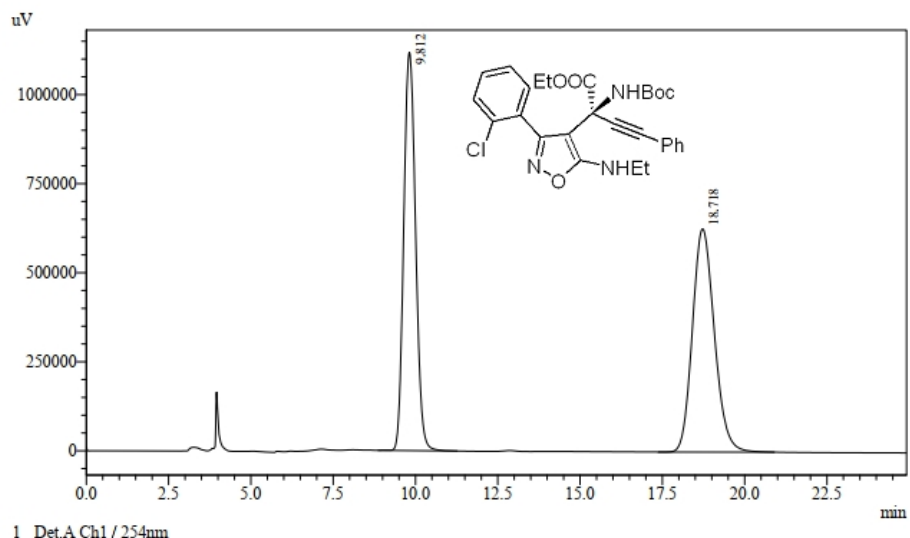

Detector A Ch1 254nm

| Peak# | Ret. Time | Area     | Height  | Area %  | Height % |
|-------|-----------|----------|---------|---------|----------|
| 1     | 9.812     | 27981707 | 1117960 | 49.066  | 64.088   |
| 2     | 18.718    | 29046927 | 626462  | 50.934  | 35.912   |
| Total |           | 57028634 | 1744422 | 100.000 | 100.000  |

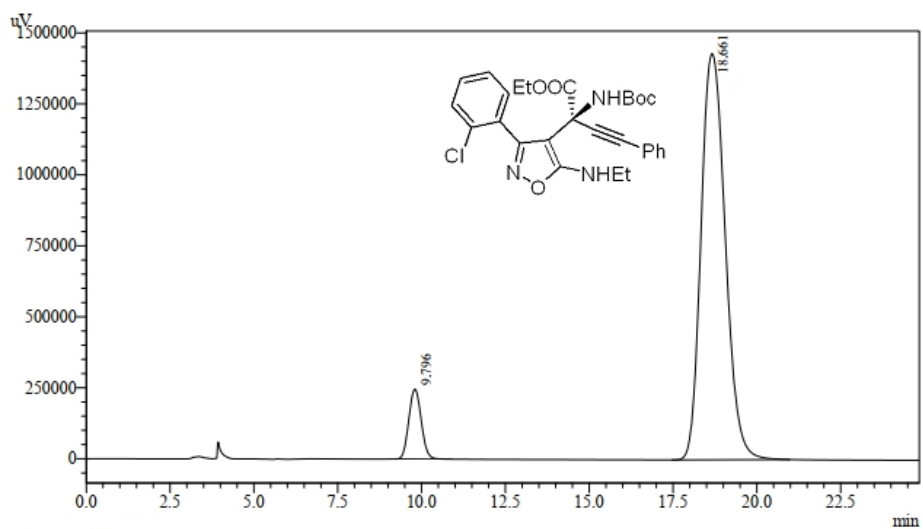

Detector A Ch1 254nm

| Peak# | Ret. Time | Area     | Height  | Area %  | Height % |
|-------|-----------|----------|---------|---------|----------|
| 1     | 9.796     | 6351622  | 246362  | 8.145   | 14.693   |
| 2     | 18.661    | 71633435 | 1430372 | 91.855  | 85.307   |
| Total |           | 77985057 | 1676735 | 100.000 | 100.000  |

**Ethyl (S)-2-((*tert*-butoxycarbonyl)amino)-2-(3-(3-chlorophenyl)-5-(ethylamino)isoxazol-4-yl)-4-phenylbut-3-ynoate (3fa)**

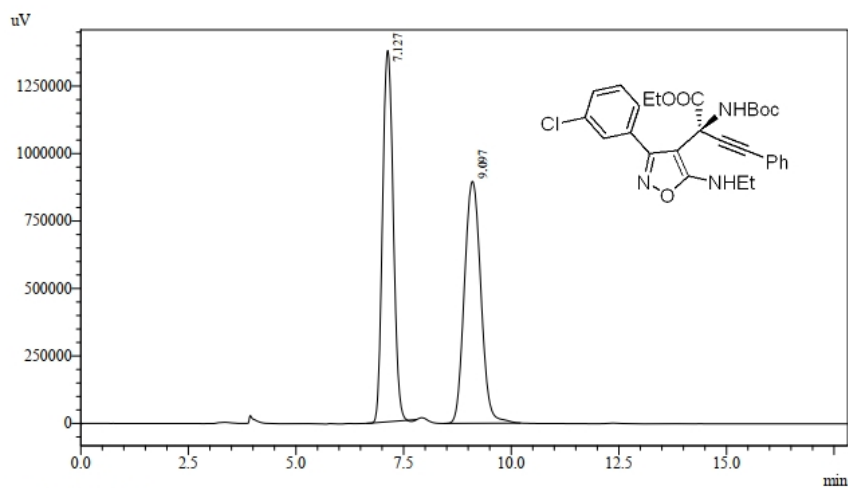

1 Det.A Ch1 / 254nm

Detector A Ch1 254nm

| Peak# | Ret. Time | Area     | Height  | Area %  | Height % |
|-------|-----------|----------|---------|---------|----------|
| 1     | 7.127     | 23684078 | 1375268 | 49.789  | 60.531   |
| 2     | 9.097     | 23885258 | 896733  | 50.211  | 39.469   |
| Total |           | 47569336 | 2272001 | 100.000 | 100.000  |

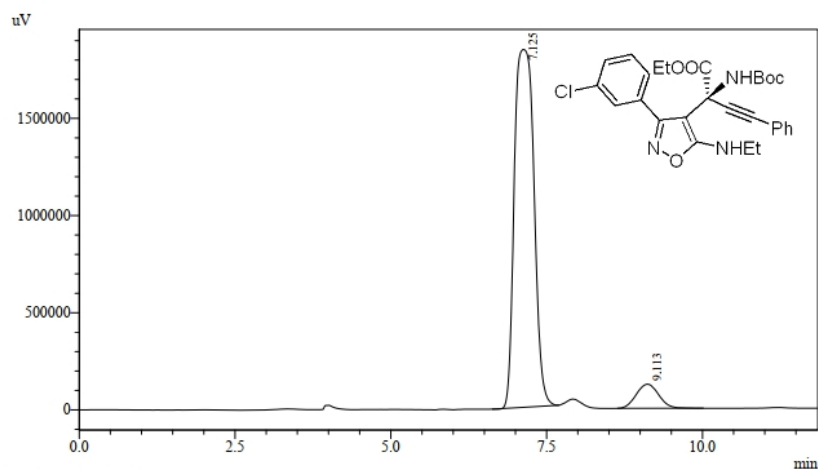

1 Det.A Ch1 / 254nm

Detector A Ch1 254nm

| Peak# | Ret. Time | Area     | Height  | Area %  | Height % |
|-------|-----------|----------|---------|---------|----------|
| 1     | 7.125     | 40266528 | 1841327 | 92.797  | 93.676   |
| 2     | 9.113     | 3125655  | 124302  | 7.203   | 6.324    |
| Total |           | 43392183 | 1965629 | 100.000 | 100.000  |

**Ethyl (S)-2-((*tert*-butoxycarbonyl)amino)-2-(3-(4-chlorophenyl)-5-(ethylamino)isoxazol-4-yl)-4-phenylbut-3-ynoate (3ga)**

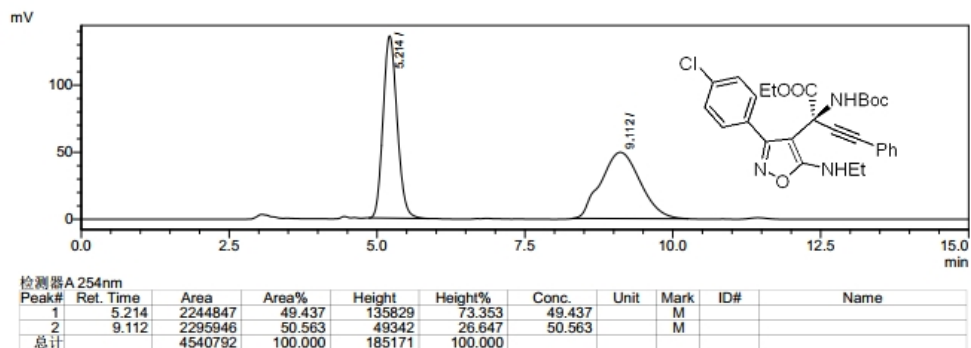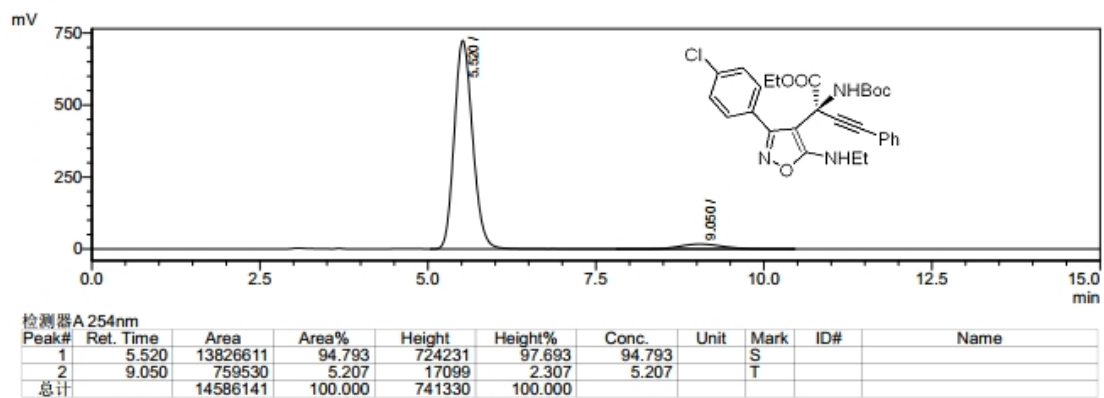

**Ethyl (S)-2-((tert-butoxycarbonyl)amino)-2-(5-(ethylamino)-3-(thiophen-2-yl)isoxazol-4-yl)-4-phenylbut-3-ynoate (3ha)**

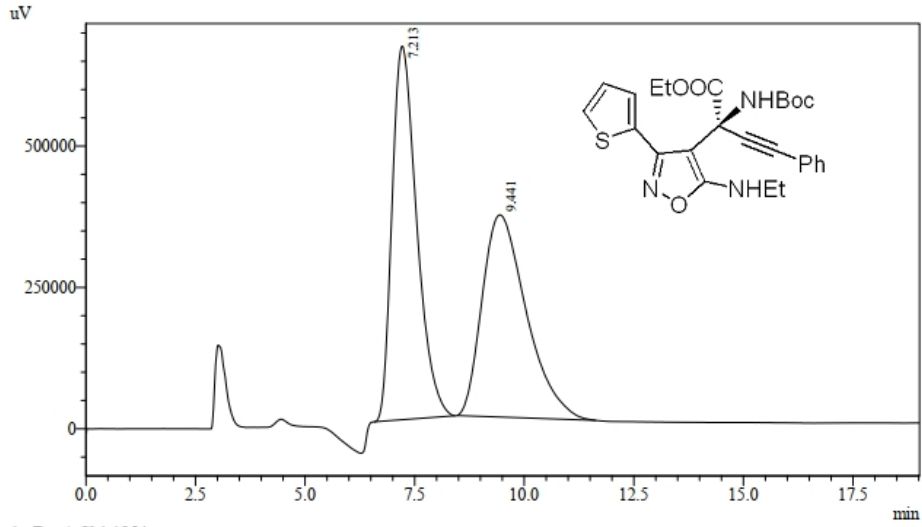

Detector A Ch1 254nm

| Peak# | Ret. Time | Area     | Height  | Area %  | Height % |
|-------|-----------|----------|---------|---------|----------|
| 1     | 7.213     | 25874649 | 660758  | 50.752  | 64.890   |
| 2     | 9.441     | 25107866 | 357511  | 49.248  | 35.110   |
| Total |           | 50982515 | 1018268 | 100.000 | 100.000  |

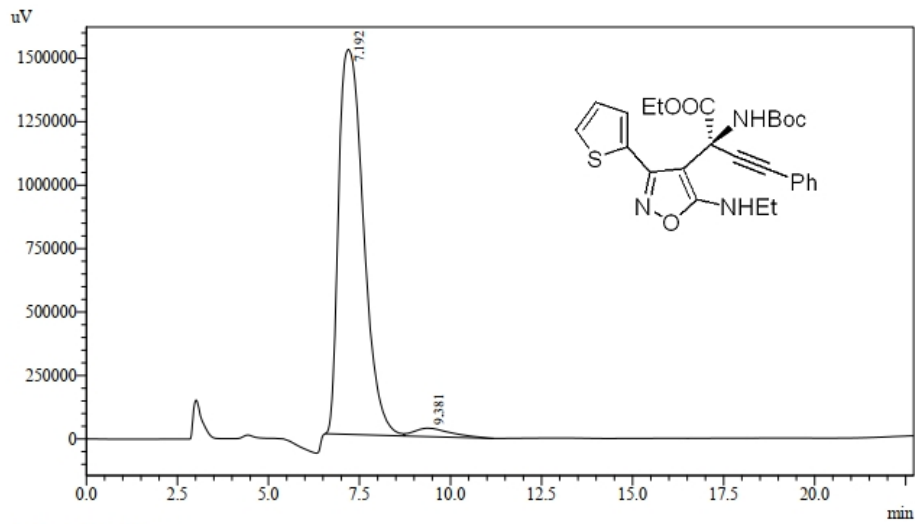

Detector A Ch1 254nm

| Peak# | Ret. Time | Area     | Height  | Area %  | Height % |
|-------|-----------|----------|---------|---------|----------|
| 1     | 7.192     | 71961416 | 1516233 | 96.862  | 97.856   |
| 2     | 9.381     | 2331039  | 33218   | 3.138   | 2.144    |
| Total |           | 74292455 | 1549451 | 100.000 | 100.000  |

**Ethyl (S)-2-((*tert*-butoxycarbonyl)amino)-2-(5-(ethylamino)-3-(furan-2-yl)isoxazol-4-yl)-4-phenylbut-3-ynoate (3ia)**

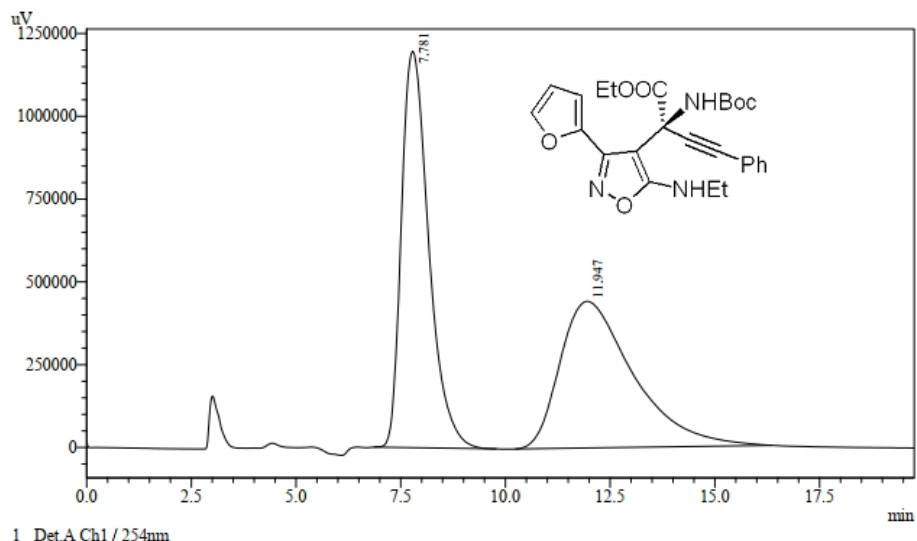

Detector A Ch1 254nm

| Peak# | Ret. Time | Area      | Height  | Area %  | Height % |
|-------|-----------|-----------|---------|---------|----------|
| 1     | 7.781     | 54288322  | 1196355 | 50.154  | 73.000   |
| 2     | 11.947    | 53954565  | 442483  | 49.846  | 27.000   |
| Total |           | 108242887 | 1638837 | 100.000 | 100.000  |

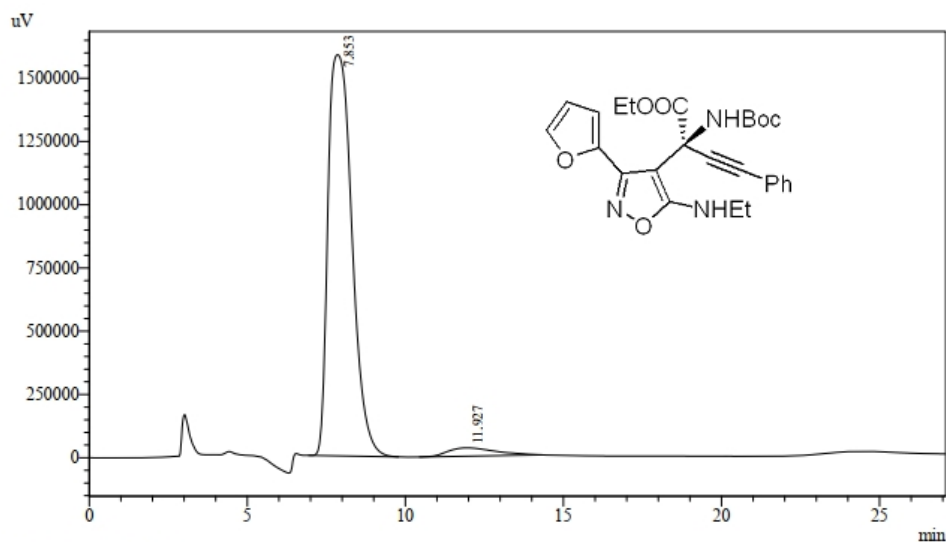

Detector A Ch1 254nm

| Peak# | Ret. Time | Area     | Height  | Area %  | Height % |
|-------|-----------|----------|---------|---------|----------|
| 1     | 7.853     | 83632165 | 1585438 | 96.051  | 97.975   |
| 2     | 11.927    | 3438634  | 32772   | 3.949   | 2.025    |
| Total |           | 87070798 | 1618210 | 100.000 | 100.000  |

**Ethyl (S)-2-((tert-butoxycarbonyl)amino)-2-(5-(ethylamino)-3-methylisoxazol-4-yl)-4-phenylbut-3-ynoate (3ja)**

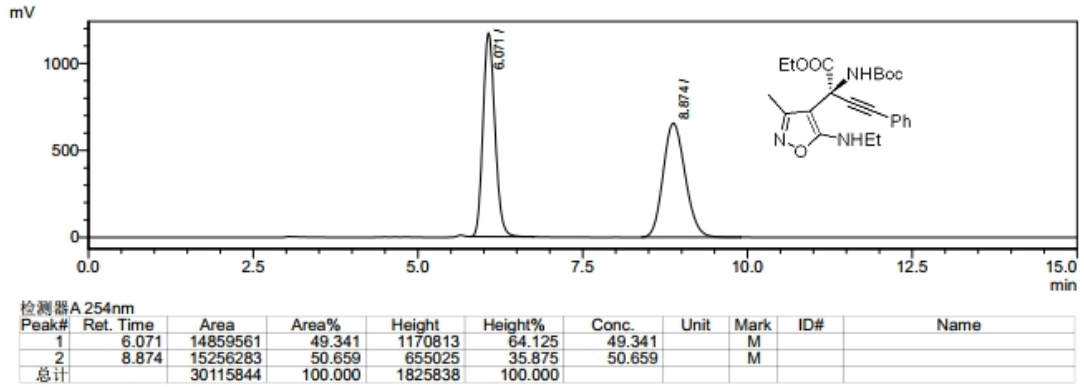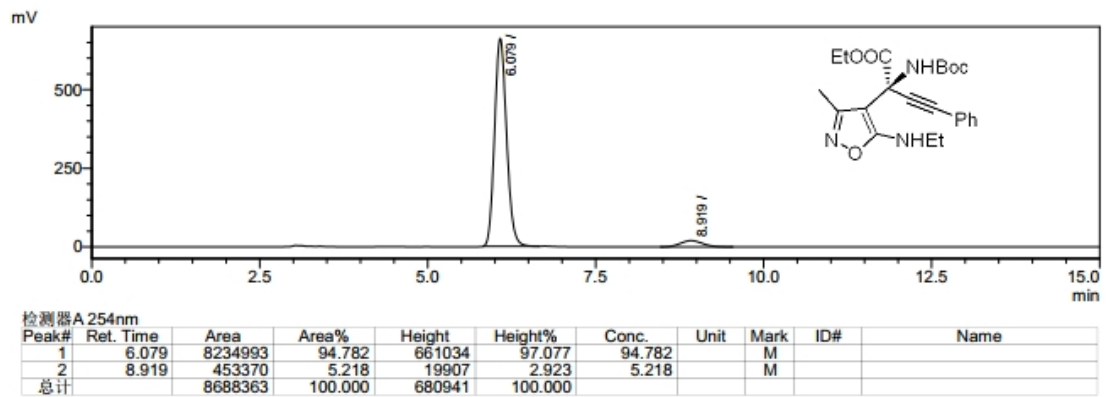

**Ethyl (S)-2-((*tert*-butoxycarbonyl)amino)-2-(5-(methylamino)-3-phenylisoxazol-4-yl)-4-phenylbut-3-ynoate (3la)**

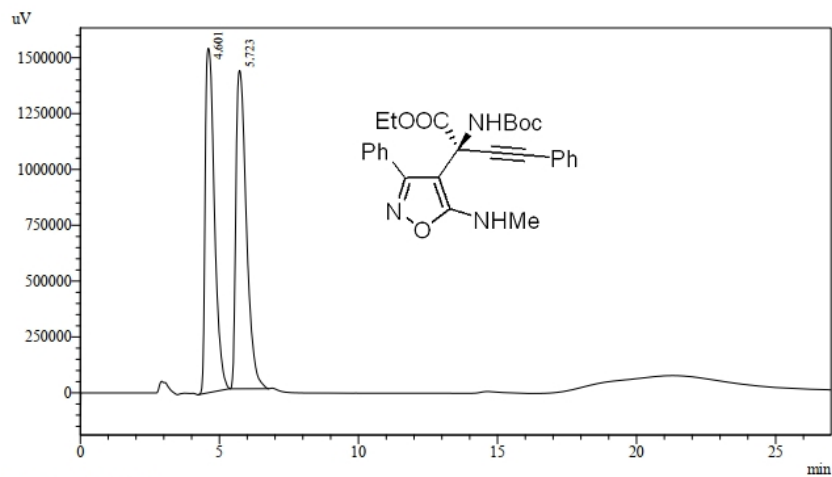

Detector A Ch1 254nm

| Peak# | Ret. Time | Area     | Height  | Area %  | Height % |
|-------|-----------|----------|---------|---------|----------|
| 1     | 4.601     | 35707236 | 1541760 | 48.844  | 51.975   |
| 2     | 5.723     | 37396748 | 1424574 | 51.156  | 48.025   |
| Total |           | 73103984 | 2966334 | 100.000 | 100.000  |

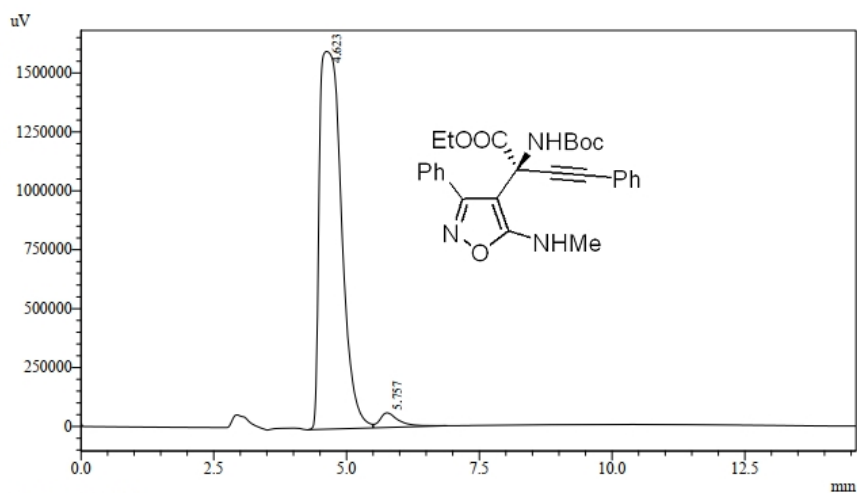

Detector A Ch1 254nm

| Peak# | Ret. Time | Area     | Height  | Area %  | Height % |
|-------|-----------|----------|---------|---------|----------|
| 1     | 4.623     | 46250888 | 1602631 | 96.727  | 96.257   |
| 2     | 5.757     | 1565130  | 62314   | 3.273   | 3.743    |
| Total |           | 47816018 | 1664945 | 100.000 | 100.000  |

**Ethyl (S)-2-((tert-butoxycarbonyl)amino)-2-(5-(butylamino)-3-phenylisoxazol-4-yl)-4-phenylbut-3-ynoate (3ma)**

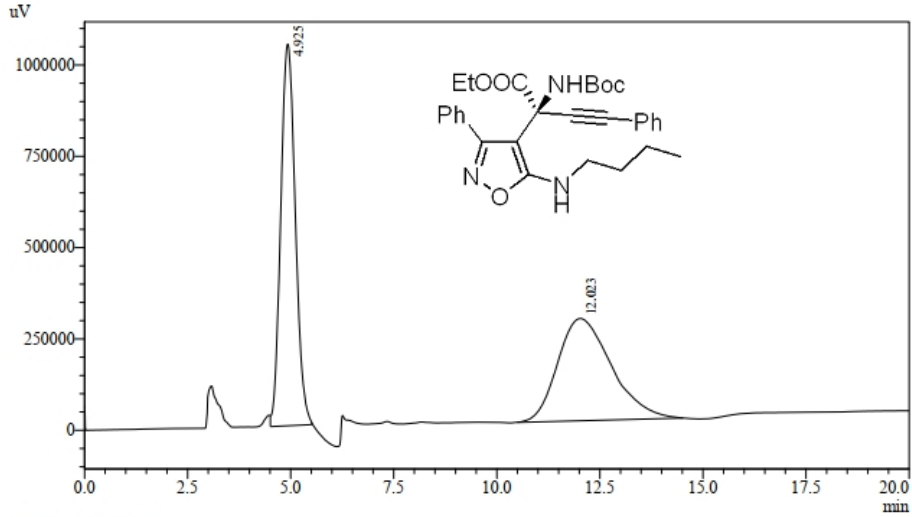

Detector A Ch1 254nm

| Peak# | Ret. Time | Area     | Height  | Area %  | Height % |
|-------|-----------|----------|---------|---------|----------|
| 1     | 4.925     | 25708825 | 1044633 | 50.344  | 78.872   |
| 2     | 12.023    | 25357121 | 279832  | 49.656  | 21.128   |
| Total |           | 51065946 | 1324465 | 100.000 | 100.000  |

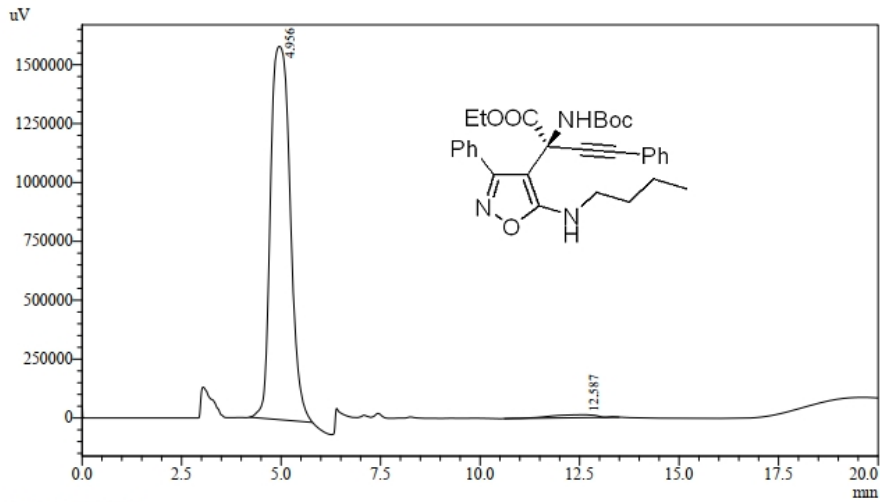

Detector A Ch1 254nm

| Peak# | Ret. Time | Area     | Height  | Area %  | Height % |
|-------|-----------|----------|---------|---------|----------|
| 1     | 4.956     | 54481905 | 1584721 | 98.213  | 99.246   |
| 2     | 12.587    | 991151   | 12044   | 1.787   | 0.754    |
| Total |           | 55473055 | 1596765 | 100.000 | 100.000  |



**Ethyl (S)-2-(5-(benzylamino)-3-phenylisoxazol-4-yl)-2-((tert-butoxycarbonyl)amino)-4-phenylbut-3-ynoate (3na)**

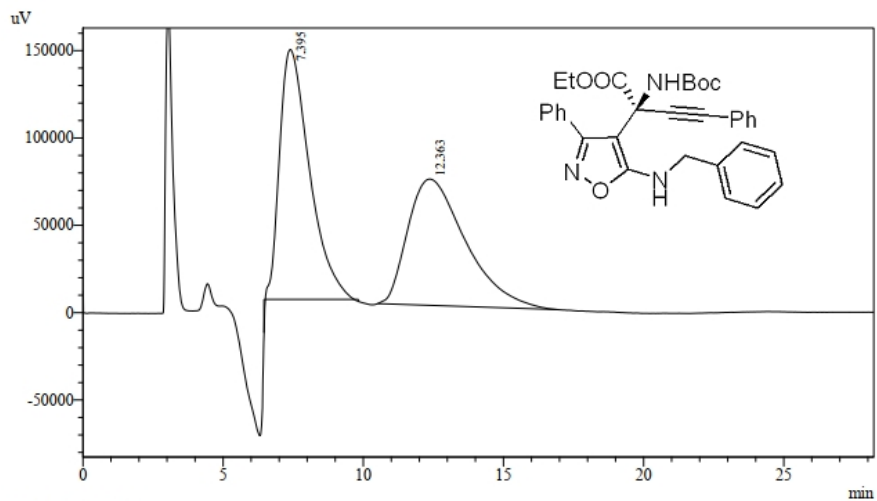

1 Det.A Ch1 / 254nm

Detector A Ch1 254nm

| Peak# | Ret. Time | Area     | Height | Area %  | Height % |
|-------|-----------|----------|--------|---------|----------|
| 1     | 7.395     | 10626764 | 143048 | 50.581  | 66.432   |
| 2     | 12.363    | 10382788 | 72283  | 49.419  | 33.568   |
| Total |           | 21009552 | 215330 | 100.000 | 100.000  |

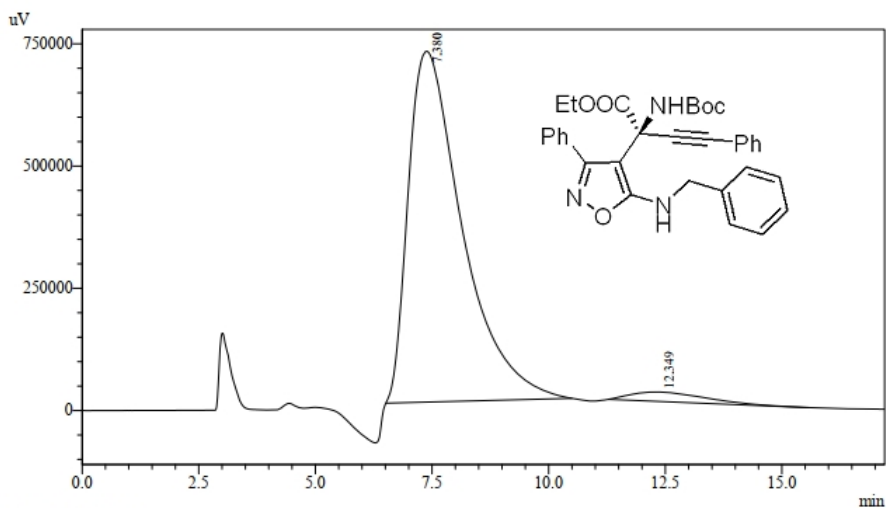

1 Det.A Ch1 / 254nm

Detector A Ch1 254nm

| Peak# | Ret. Time | Area     | Height | Area %  | Height % |
|-------|-----------|----------|--------|---------|----------|
| 1     | 7.380     | 57815609 | 717490 | 96.387  | 97.374   |
| 2     | 12.349    | 2167395  | 19350  | 3.613   | 2.626    |
| Total |           | 59983005 | 736840 | 100.000 | 100.000  |

**Ethyl (S)-2-(5-(allylamino)-3-phenylisoxazol-4-yl)-2-((tert-butoxycarbonyl)amino)-4-phenylbut-3-ynoate (30a)**

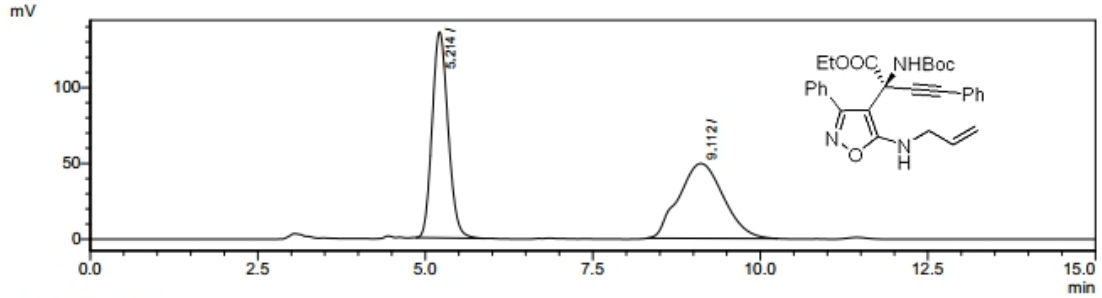

检测器A 254nm

| Peak# | Ret. Time | Area    | Area%   | Height | Height% | Conc.  | Unit | Mark | ID# | Name |
|-------|-----------|---------|---------|--------|---------|--------|------|------|-----|------|
| 1     | 5.214     | 2244847 | 49.437  | 135829 | 73.353  | 49.437 |      | M    |     |      |
| 2     | 9.112     | 2295946 | 50.563  | 49342  | 26.647  | 50.563 |      | M    |     |      |
| 总计    |           | 4540792 | 100.000 | 185171 | 100.000 |        |      |      |     |      |

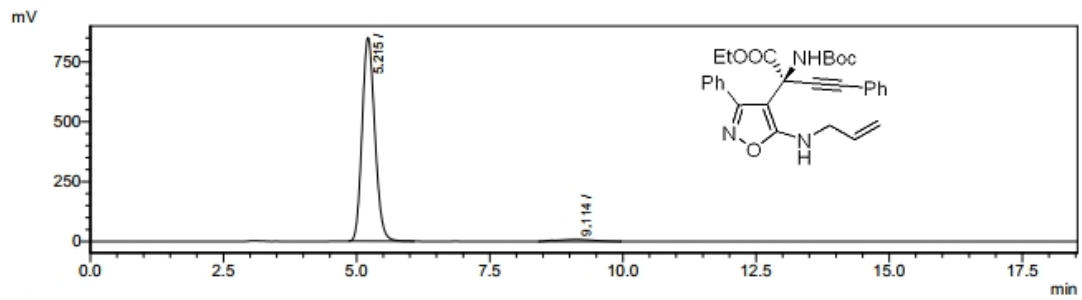

检测器A 254nm

| Peak# | Ret. Time | Area     | Area%   | Height | Height% | Conc.  | Unit | Mark | ID# | Name |
|-------|-----------|----------|---------|--------|---------|--------|------|------|-----|------|
| 1     | 5.215     | 14147904 | 97.441  | 850098 | 99.078  | 97.441 |      | M    |     |      |
| 2     | 9.114     | 371619   | 2.559   | 7907   | 0.922   | 2.559  |      | M    |     |      |
| 总计    |           | 14519522 | 100.000 | 858005 | 100.000 |        |      |      |     |      |

**Ethyl (*S*)-2-((*tert*-butoxycarbonyl)amino)-2-(5-(ethylamino)-3-(4-methoxyphenyl)isothiazol-4-yl)-4-phenylbut-3-ynoate (3qa)**

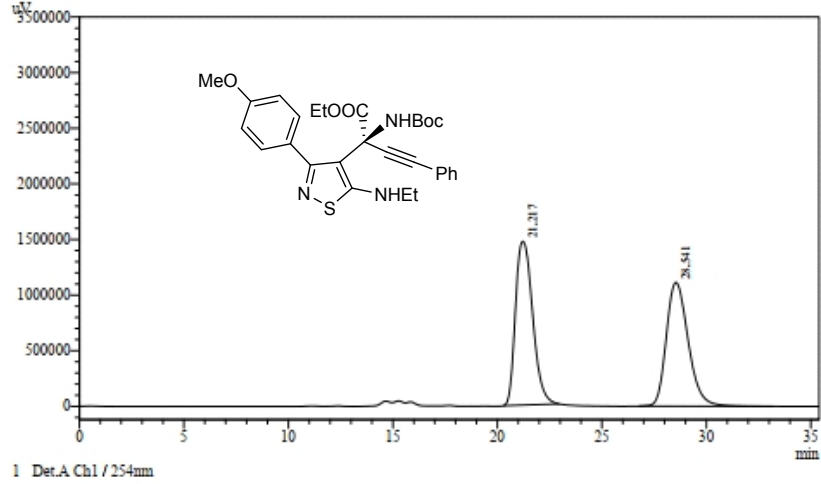

Detector A Ch1 254nm

| Peak# | Ret. Time | Area      | Height  | Area %  | Height % |
|-------|-----------|-----------|---------|---------|----------|
| 1     | 21.217    | 84292336  | 1471914 | 50.967  | 56.956   |
| 2     | 28.541    | 81092490  | 1112388 | 49.033  | 43.044   |
| Total |           | 165384825 | 2584301 | 100.000 | 100.000  |

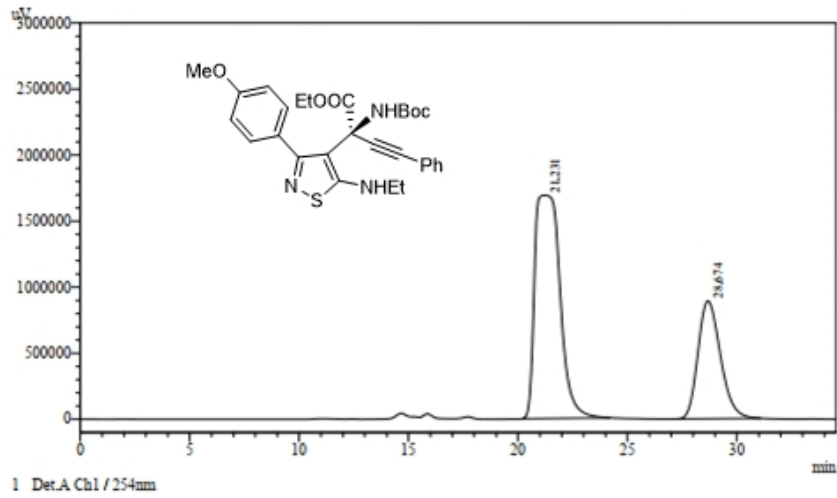

Detector A Ch1 254nm

| Peak# | Ret. Time | Area      | Height  | Area %  | Height % |
|-------|-----------|-----------|---------|---------|----------|
| 1     | 21.231    | 135900061 | 1689343 | 68.088  | 65.441   |
| 2     | 28.674    | 63694259  | 892126  | 31.912  | 34.559   |
| Total |           | 199594320 | 2581469 | 100.000 | 100.000  |

**Ethyl (S)-2-((tert-butoxycarbonyl)amino)-2-(5-(ethylamino)-3-phenylisoxazol-4-yl)-4-(4-methoxyphenyl)but-3-ynoate (3ab)**

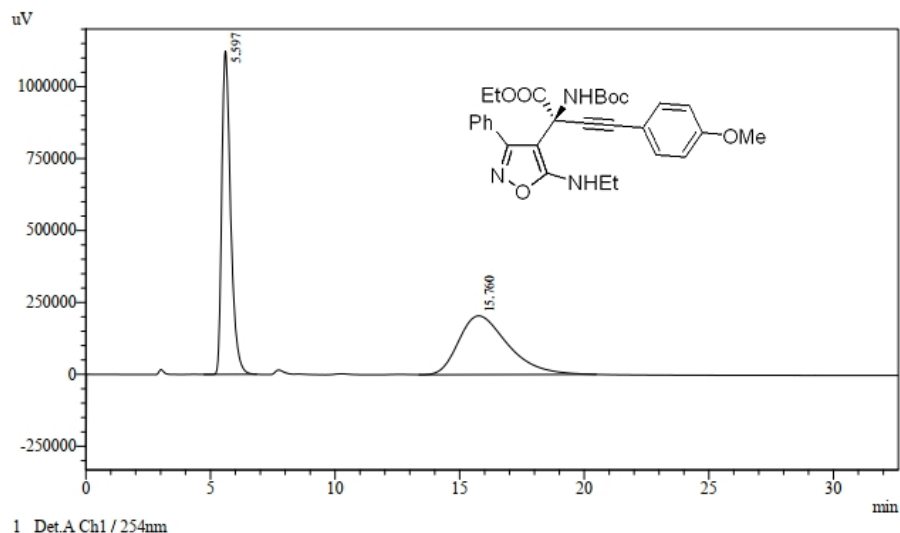

1 Det.A Ch1 / 254nm

Detector A Ch1 254nm

| Peak# | Ret. Time | Area     | Height  | Area %  | Height % |
|-------|-----------|----------|---------|---------|----------|
| 1     | 5.597     | 27813238 | 1123497 | 49.837  | 84.625   |
| 2     | 15.760    | 27994932 | 204116  | 50.163  | 15.375   |
| Total |           | 55808170 | 1327613 | 100.000 | 100.000  |

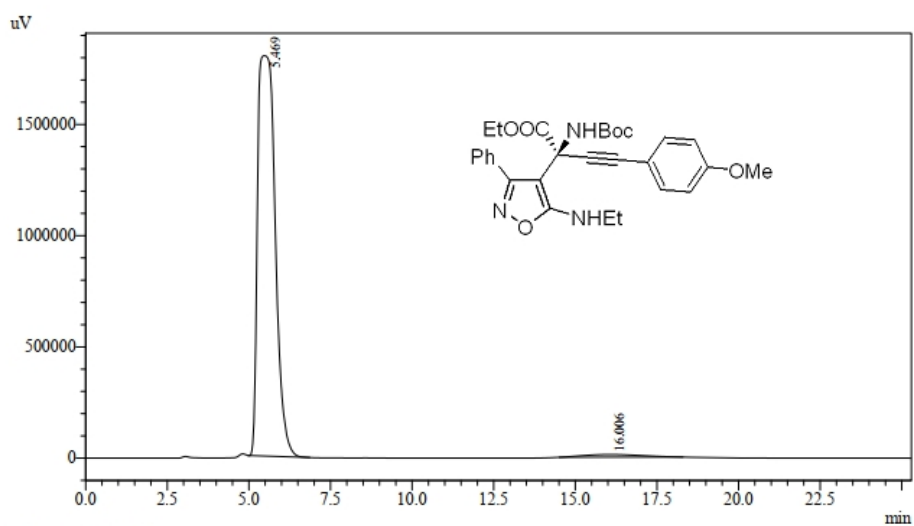

1 Det.A Ch1 / 254nm

Detector A Ch1 254nm

| Peak# | Ret. Time | Area     | Height  | Area %  | Height % |
|-------|-----------|----------|---------|---------|----------|
| 1     | 5.469     | 67354854 | 1799573 | 97.779  | 99.330   |
| 2     | 16.006    | 1530132  | 12141   | 2.221   | 0.670    |
| Total |           | 68884986 | 1811715 | 100.000 | 100.000  |

**Ethyl (S)-2-((tert-butoxycarbonyl)amino)-2-(5-(ethylamino)-3-phenylisoxazol-4-yl)-4-(m-tolyl)but-3-ynoate (3ac)**

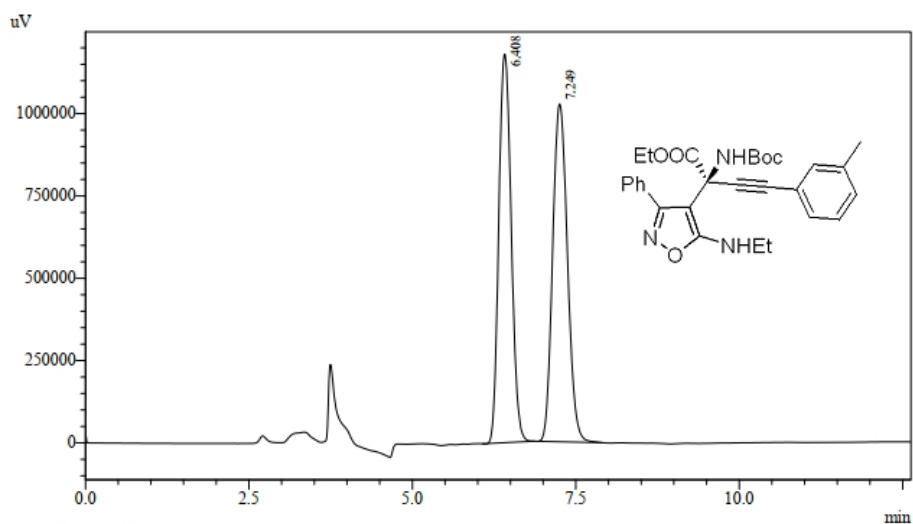

Detector A Ch1 254nm

| Peak# | Ret. Time | Area     | Height  | Area %  | Height % |
|-------|-----------|----------|---------|---------|----------|
| 1     | 6.408     | 15595369 | 1179601 | 49.167  | 53.479   |
| 2     | 7.249     | 16123996 | 1026132 | 50.833  | 46.521   |
| Total |           | 31719365 | 2205734 | 100.000 | 100.000  |

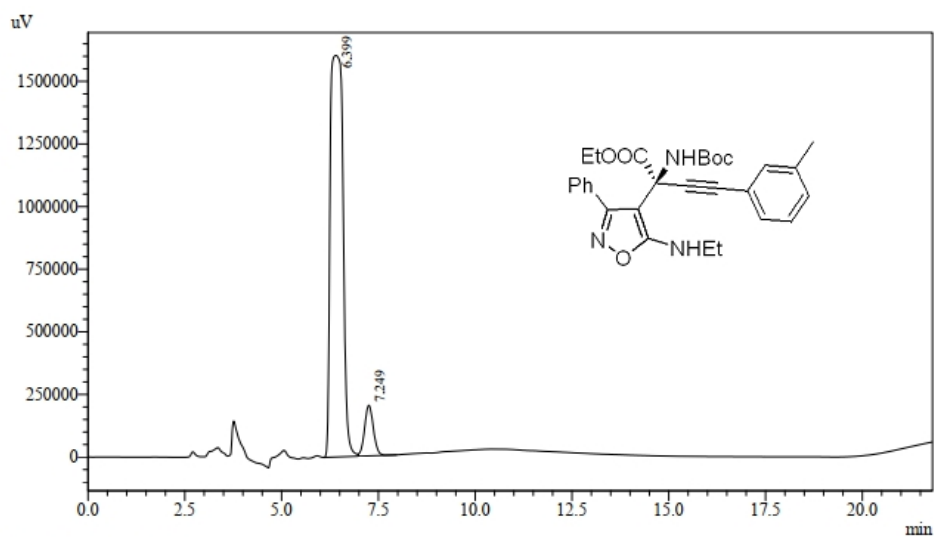

Detector A Ch1 254nm

| Peak# | Ret. Time | Area     | Height  | Area %  | Height % |
|-------|-----------|----------|---------|---------|----------|
| 1     | 6.399     | 36651894 | 1603009 | 92.058  | 88.811   |
| 2     | 7.249     | 3161945  | 201956  | 7.942   | 11.189   |
| Total |           | 39813839 | 1804965 | 100.000 | 100.000  |

**Ethyl (S)-2-((tert-butoxycarbonyl)amino)-2-(5-(ethylamino)-3-phenylisoxazol-4-yl)-4-(p-tolyl)but-3-ynoate (3ad)**

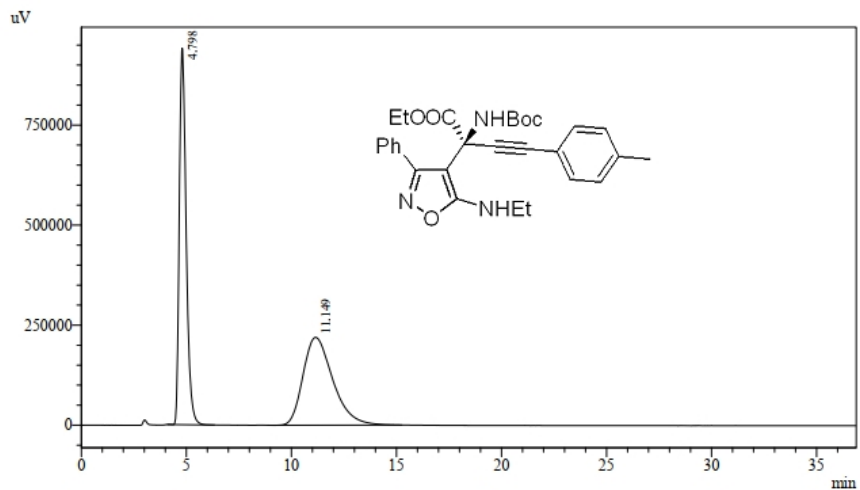

1 Det.A Ch1 / 254nm

Detector A Ch1 254nm

| Peak# | Ret. Time | Area     | Height  | Area %  | Height % |
|-------|-----------|----------|---------|---------|----------|
| 1     | 4.798     | 21419110 | 940712  | 49.720  | 81.086   |
| 2     | 11.149    | 21660163 | 219434  | 50.280  | 18.914   |
| Total |           | 43079273 | 1160146 | 100.000 | 100.000  |

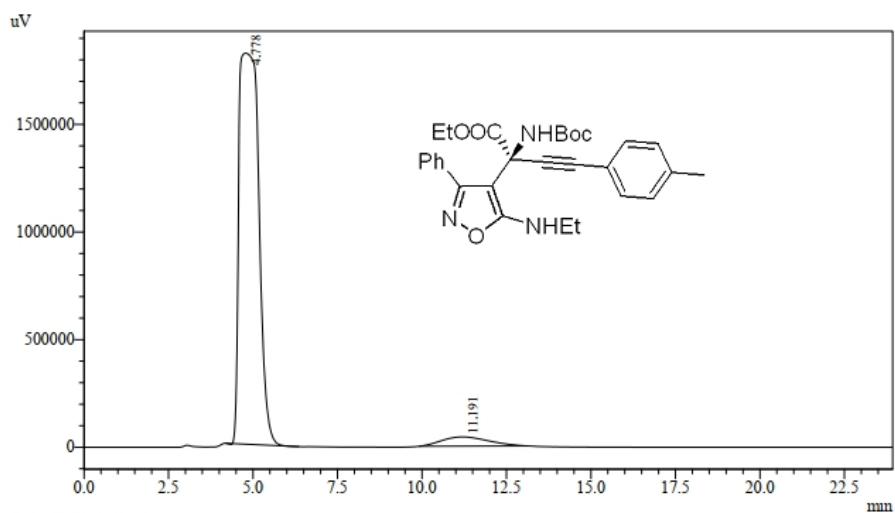

1 Det.A Ch1 / 254nm

Detector A Ch1 254nm

| Peak# | Ret. Time | Area     | Height  | Area %  | Height % |
|-------|-----------|----------|---------|---------|----------|
| 1     | 4.778     | 74144566 | 1816487 | 94.737  | 97.701   |
| 2     | 11.191    | 4118682  | 42744   | 5.263   | 2.299    |
| Total |           | 78263248 | 1859231 | 100.000 | 100.000  |

**Ethyl (*S*)-2-((*tert*-butoxycarbonyl)amino)-4-(2-chlorophenyl)-2-(5-(ethylamino)-3-phenylisoxazol-4-yl)but-3-ynoate (3ae)**

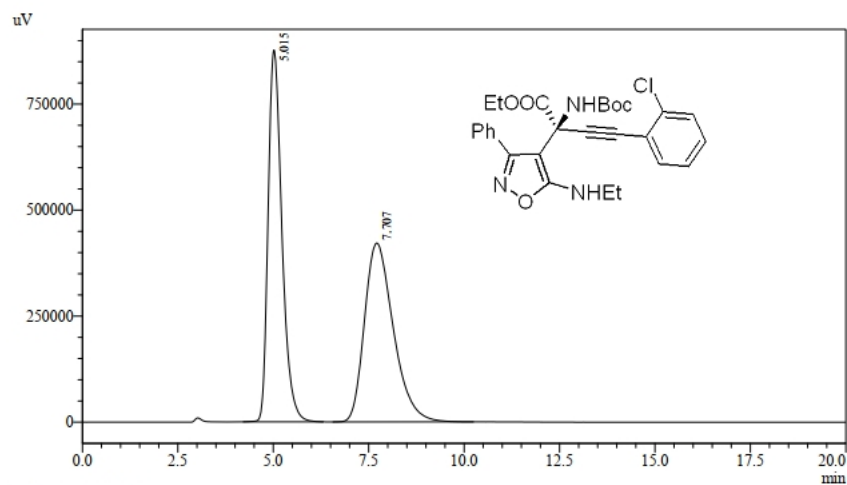

1 Det.A Ch1 / 254nm

Detector A Ch1 254nm

| Peak# | Ret. Time | Area     | Height  | Area %  | Height % |
|-------|-----------|----------|---------|---------|----------|
| 1     | 5.015     | 21992633 | 876636  | 49.759  | 67.520   |
| 2     | 7.707     | 22205834 | 421707  | 50.241  | 32.480   |
| Total |           | 44198467 | 1298343 | 100.000 | 100.000  |

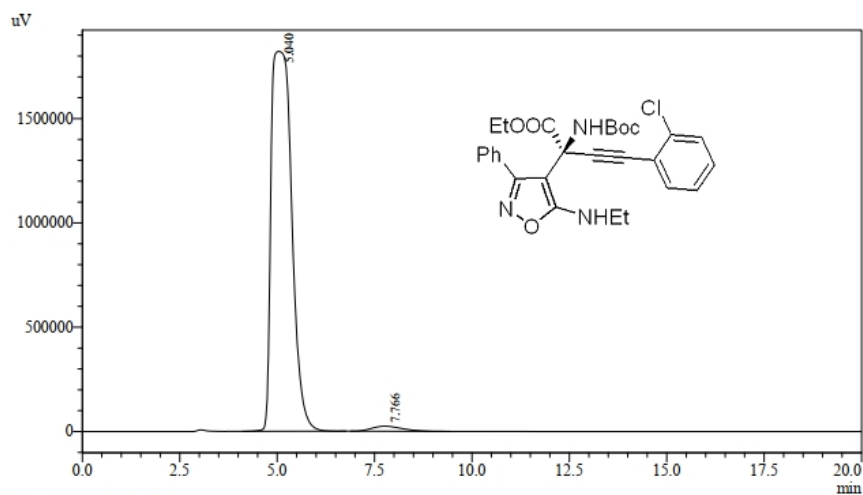

1 Det.A Ch1 / 254nm

Detector A Ch1 254nm

| Peak# | Ret. Time | Area     | Height  | Area %  | Height % |
|-------|-----------|----------|---------|---------|----------|
| 1     | 5.040     | 67112027 | 1821244 | 98.044  | 98.667   |
| 2     | 7.766     | 1339101  | 24601   | 1.956   | 1.333    |
| Total |           | 68451128 | 1845845 | 100.000 | 100.000  |

**Ethyl (S)-2-((tert-butoxycarbonyl)amino)-4-(3-chlorophenyl)-2-(5-(ethylamino)-3-phenylisoxazol-4-yl)but-3-ynoate (3af)**

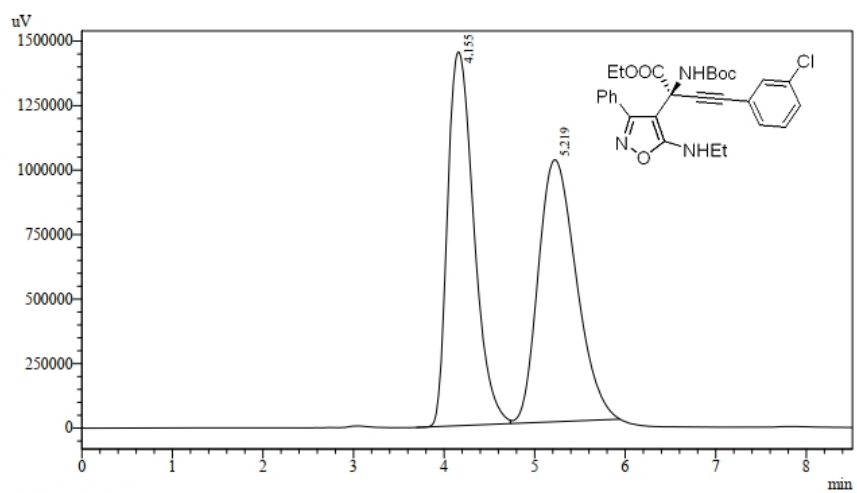

1 Det.A Ch1 / 254nm

Detector A Ch1 254nm

| Peak# | Ret. Time | Area     | Height  | Area %  | Height % |
|-------|-----------|----------|---------|---------|----------|
| 1     | 4.155     | 29317843 | 1448940 | 49.722  | 58.788   |
| 2     | 5.219     | 29645727 | 1015737 | 50.278  | 41.212   |
| Total |           | 58963570 | 2464677 | 100.000 | 100.000  |

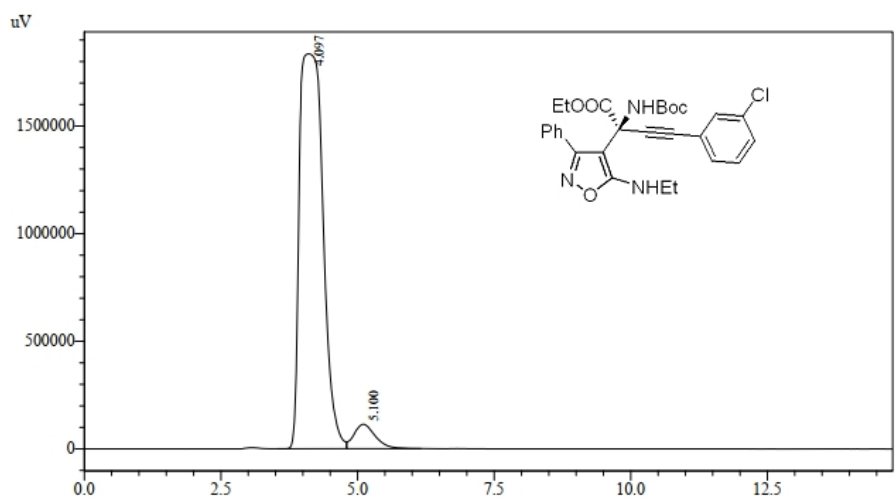

1 Det.A Ch1 / 254nm

Detector A Ch1 254nm

| Peak# | Ret. Time | Area     | Height  | Area %  | Height % |
|-------|-----------|----------|---------|---------|----------|
| 1     | 4.097     | 55099968 | 1834792 | 94.683  | 94.157   |
| 2     | 5.100     | 3094467  | 113868  | 5.317   | 5.843    |
| Total |           | 58194435 | 1948659 | 100.000 | 100.000  |



**Ethyl (S)-2-((*tert*-butoxycarbonyl)amino)-4-(4-chlorophenyl)-2-(5-(ethylamino)-3-phenylisoxazol-4-yl)but-3-ynoate (3ag)**

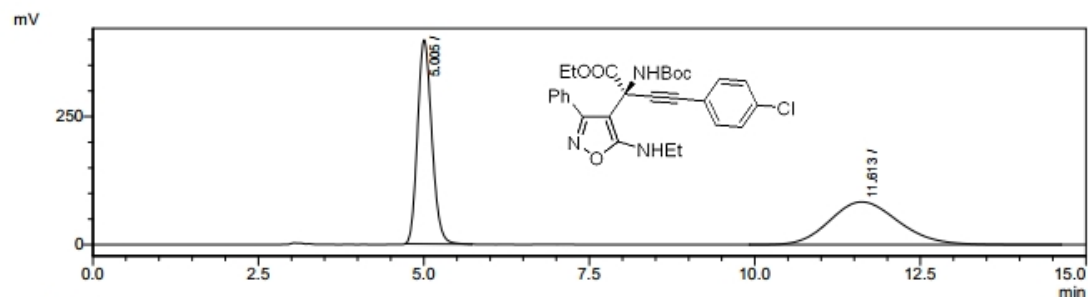

检测器A 254nm

| Peak# | Ret. Time | Area     | Area%   | Height | Height% | Conc.  | Unit | Mark | ID# | Name |
|-------|-----------|----------|---------|--------|---------|--------|------|------|-----|------|
| 1     | 5.005     | 5979624  | 49.728  | 398112 | 82.671  | 49.728 |      | M    |     |      |
| 2     | 11.613    | 6045156  | 50.272  | 83451  | 17.329  | 50.272 |      |      |     |      |
| 总计    |           | 12024780 | 100.000 | 481563 | 100.000 |        |      |      |     |      |

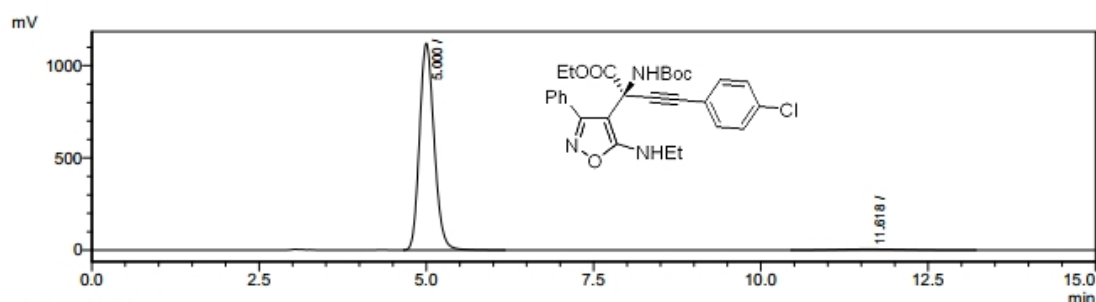

检测器A 254nm

| Peak# | Ret. Time | Area     | Area%   | Height  | Height% | Conc.  | Unit | Mark | ID# | Name |
|-------|-----------|----------|---------|---------|---------|--------|------|------|-----|------|
| 1     | 5.000     | 17039664 | 97.812  | 1121238 | 99.516  | 97.812 |      | M    |     |      |
| 2     | 11.618    | 381203   | 2.188   | 5457    | 0.484   | 2.188  |      | M    |     |      |
| 总计    |           | 17420867 | 100.000 | 1126695 | 100.000 |        |      |      |     |      |

**Ethyl (S)-4-(4-bromophenyl)-2-((tert-butoxycarbonyl)amino)-2-(5-(ethylamino)-3-phenylisoxazol-4-yl)but-3-ynoate (3ah)**

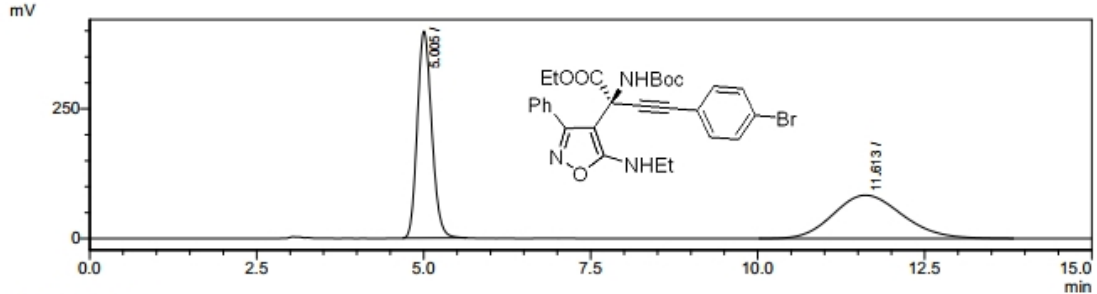

| Peak# | Ret. Time | Area     | Area%   | Height | Height% | Conc.  | Unit | Mark | ID# | Name |
|-------|-----------|----------|---------|--------|---------|--------|------|------|-----|------|
| 1     | 5.005     | 5989072  | 49.907  | 398486 | 82.704  | 49.907 |      | M    |     |      |
| 2     | 11.613    | 6011475  | 50.093  | 83335  | 17.296  | 50.093 |      | M    |     |      |
| 总计    |           | 12000547 | 100.000 | 481821 | 100.000 |        |      |      |     |      |

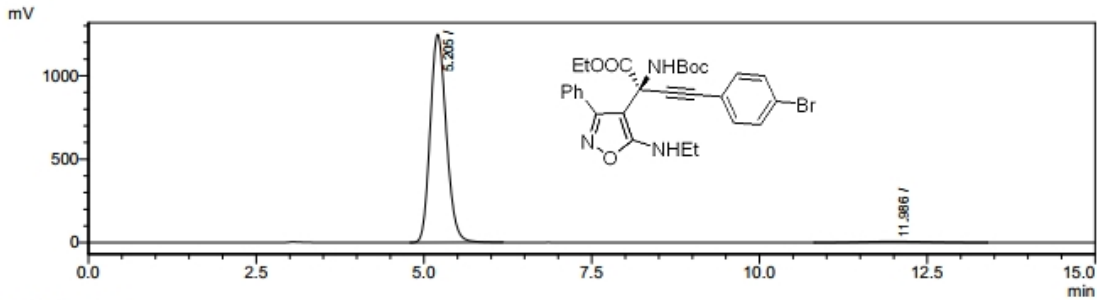

| Peak# | Ret. Time | Area     | Area%   | Height  | Height% | Conc.  | Unit | Mark | ID# | Name |
|-------|-----------|----------|---------|---------|---------|--------|------|------|-----|------|
| 1     | 5.205     | 20844272 | 97.942  | 1247683 | 99.503  | 97.942 |      | M    |     |      |
| 2     | 11.986    | 438032   | 2.058   | 6231    | 0.497   | 2.058  |      | M    |     |      |
| 总计    |           | 21282304 | 100.000 | 1253913 | 100.000 |        |      |      |     |      |

**Ethyl (S)-2-((tert-butoxycarbonyl)amino)-2-(5-(ethylamino)-3-phenylisoxazol-4-yl)-4-(4-fluorophenyl)but-3-ynoate (3ai)**

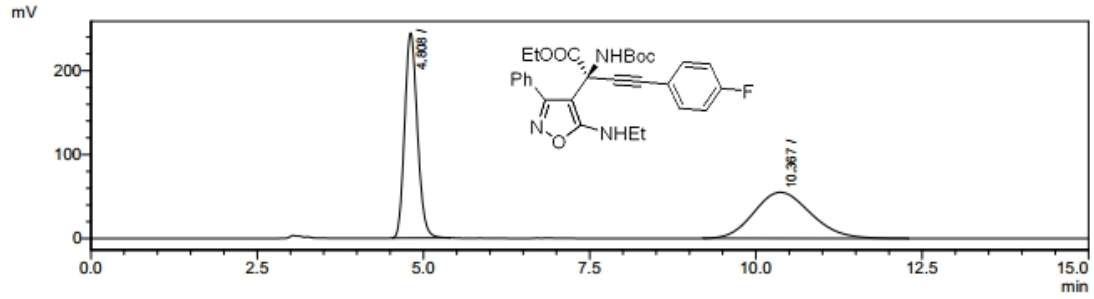

检测器A 254nm

| Peak# | Ret. Time | Area    | Area%   | Height | Height% | Conc.  | Unit | Mark | ID# | Name |
|-------|-----------|---------|---------|--------|---------|--------|------|------|-----|------|
| 1     | 4.808     | 3253827 | 49.934  | 244517 | 81.658  | 49.934 |      | M    |     |      |
| 2     | 10.367    | 3262463 | 50.066  | 54922  | 18.342  | 50.066 |      | M    |     |      |
| 总计    |           | 6516290 | 100.000 | 299439 | 100.000 |        |      |      |     |      |

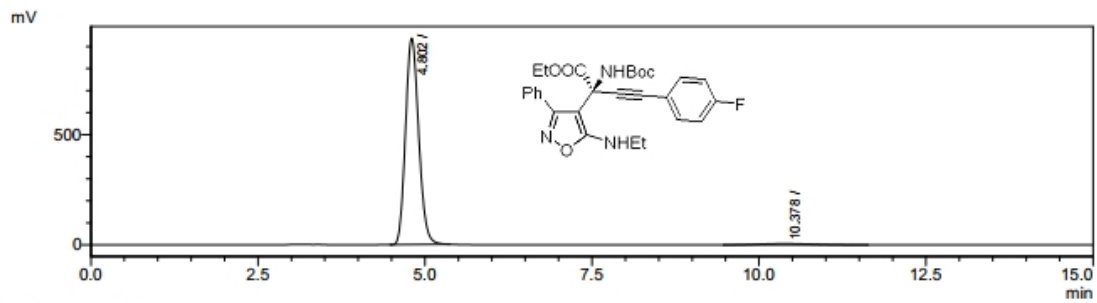

检测器A 254nm

| Peak# | Ret. Time | Area     | Area%   | Height | Height% | Conc.  | Unit | Mark | ID# | Name |
|-------|-----------|----------|---------|--------|---------|--------|------|------|-----|------|
| 1     | 4.802     | 12847779 | 97.674  | 936876 | 99.429  | 97.674 |      | M    |     |      |
| 2     | 10.378    | 305931   | 2.326   | 5385   | 0.571   | 2.326  |      | M    |     |      |
| 总计    |           | 13153710 | 100.000 | 942261 | 100.000 |        |      |      |     |      |

**Ethyl (S)-2-((tert-butoxycarbonyl)amino)-2-(5-(ethylamino)-3-phenylisoxazol-4-yl)-4-(4-(trifluoromethyl)phenyl)but-3-ynoate (3aj)**

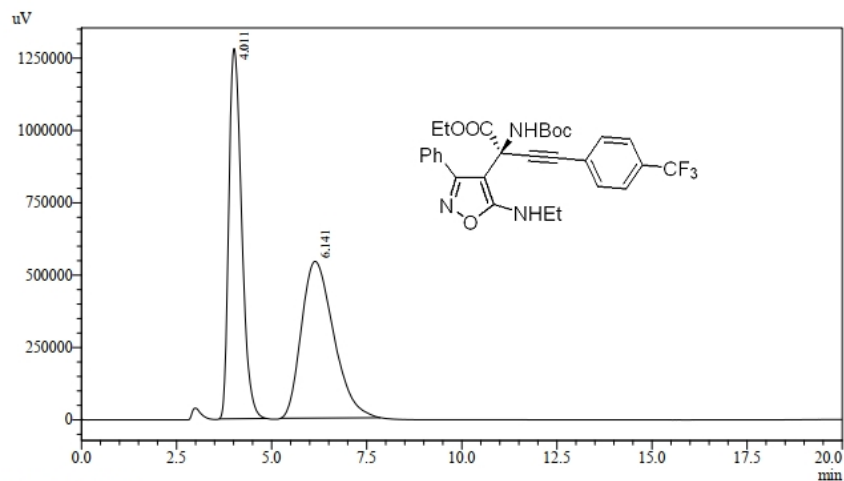

1 Det.A Ch1 / 254nm

Detector A Ch1 254nm

| Peak# | Ret. Time | Area     | Height  | Area %  | Height % |
|-------|-----------|----------|---------|---------|----------|
| 1     | 4.011     | 30043198 | 1278922 | 48.454  | 70.258   |
| 2     | 6.141     | 31960796 | 541411  | 51.546  | 29.742   |
| Total |           | 62003994 | 1820333 | 100.000 | 100.000  |

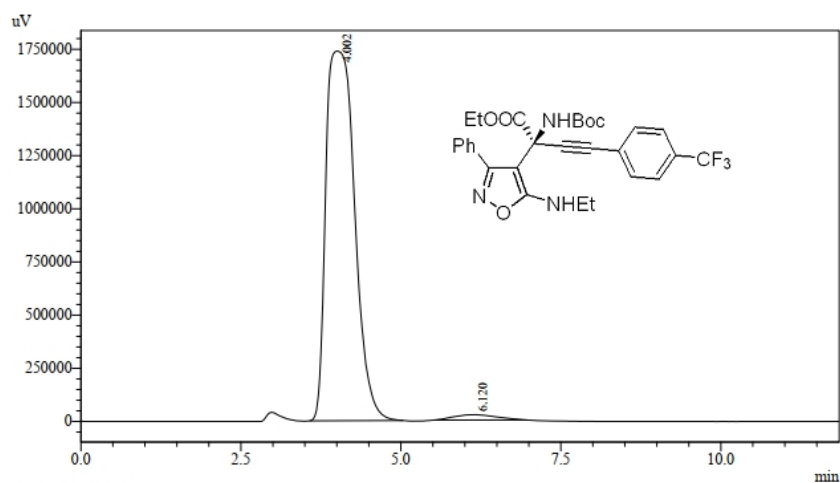

1 Det.A Ch1 / 254nm

Detector A Ch1 254nm

| Peak# | Ret. Time | Area     | Height  | Area %  | Height % |
|-------|-----------|----------|---------|---------|----------|
| 1     | 4.002     | 54430182 | 1737687 | 97.878  | 98.580   |
| 2     | 6.120     | 1180115  | 25033   | 2.122   | 1.420    |
| Total |           | 55610297 | 1762721 | 100.000 | 100.000  |

**Ethyl (S)-2-((tert-butoxycarbonyl)amino)-2-(5-(ethylamino)-3-phenylisoxazol-4-yl)-4-(thiophen-2-yl)but-3-ynoate (3ak)**

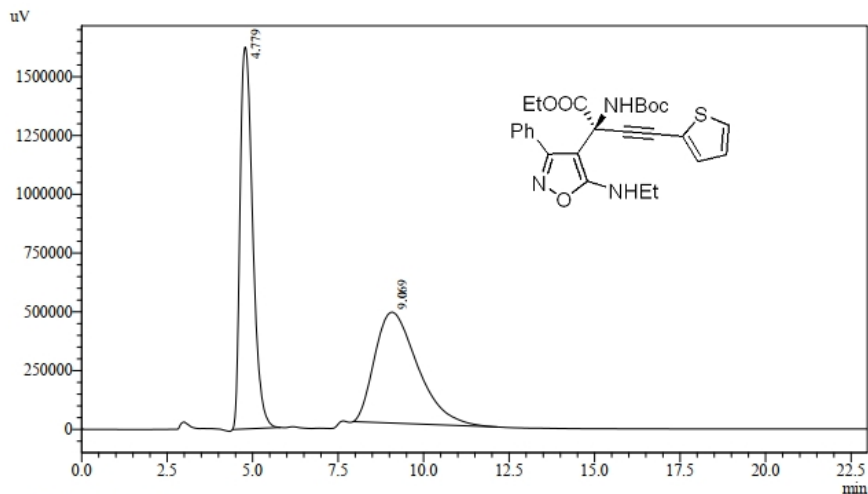

1 Det.A Ch1 / 254nm

Detector A Ch1 254nm

| Peak# | Ret. Time | Area     | Height  | Area %  | Height % |
|-------|-----------|----------|---------|---------|----------|
| 1     | 4.779     | 41648359 | 1623925 | 50.231  | 77.499   |
| 2     | 9.069     | 41266042 | 471501  | 49.769  | 22.501   |
| Total |           | 82914401 | 2095426 | 100.000 | 100.000  |

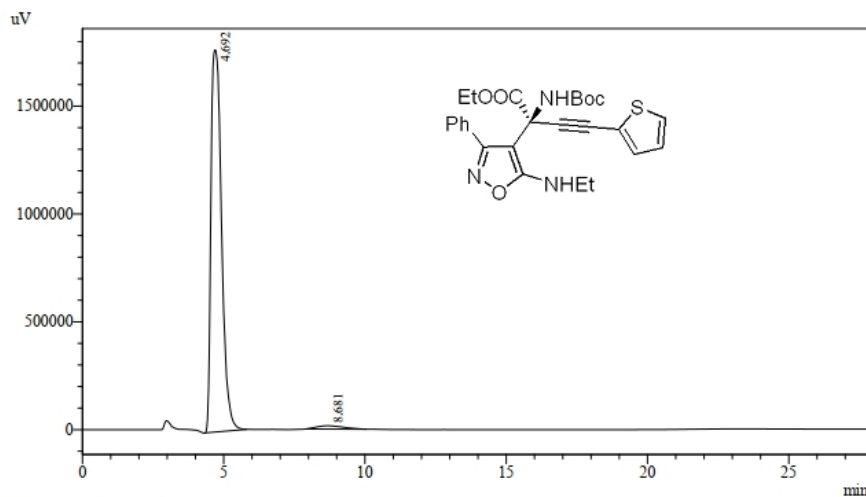

1 Det.A Ch1 / 254nm

Detector A Ch1 254nm

| Peak# | Ret. Time | Area     | Height  | Area %  | Height % |
|-------|-----------|----------|---------|---------|----------|
| 1     | 4.692     | 46147799 | 1771657 | 97.821  | 99.136   |
| 2     | 8.681     | 1028183  | 15446   | 2.179   | 0.864    |
| Total |           | 47175982 | 1787103 | 100.000 | 100.000  |

**Ethyl (S)-2-((tert-butoxycarbonyl)amino)-2-(5-(ethylamino)-3-phenylisoxazol-4-yl)-4-(naphthalen-2-yl)but-3-ynoate (3a)**

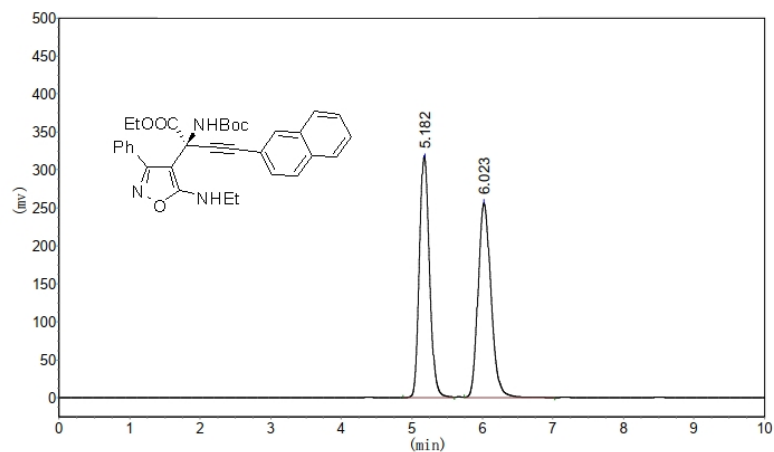

| Peak# | Ret. Time | Hight      | Area        | Area%    |
|-------|-----------|------------|-------------|----------|
| 1     | 5.182     | 317120.656 | 3179666.500 | 49.2000  |
| 2     | 6.023     | 255598.406 | 3283076.500 | 50.8000  |
| Total |           | 572719.063 | 6462743.000 | 100.0000 |

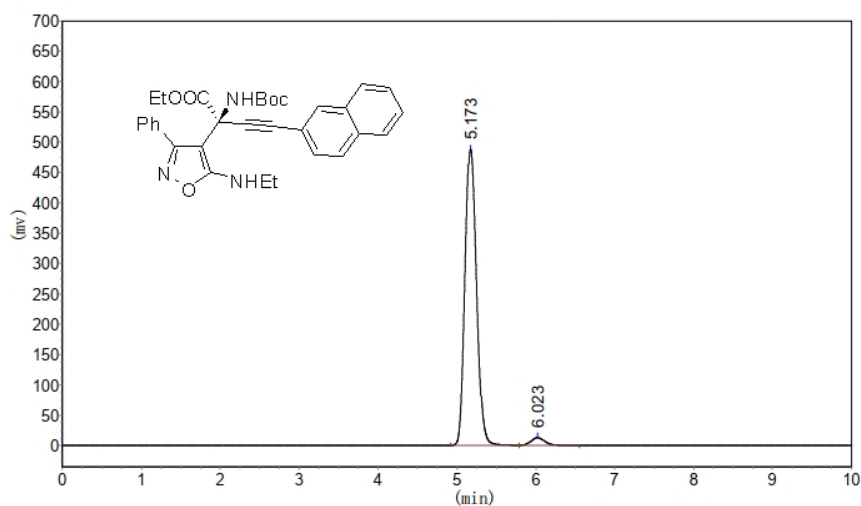

| Peak# | Ret. Time | Hight      | Area        | Area%    |
|-------|-----------|------------|-------------|----------|
| 1     | 5.173     | 487572.938 | 4992920.500 | 96.8632  |
| 2     | 6.023     | 13350.062  | 161689.188  | 3.1368   |
| Total |           | 500922.999 | 5154609.688 | 100.0000 |

**Ethyl (S)-2-((tert-butoxycarbonyl)amino)-2-(5-(ethylamino)-3-phenylisoxazol-4-yl)-4-(triisopropylsilyl)but-3-ynoate (3am)**

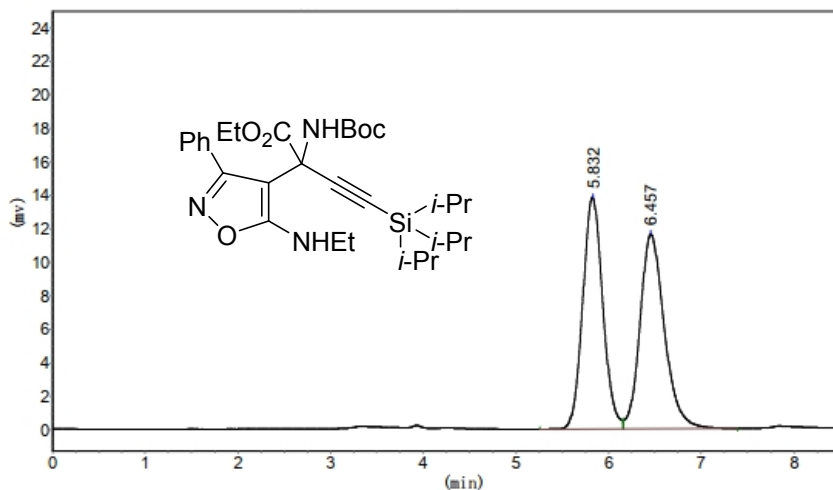

| Peak# | Ret. Time | Hight     | Area       | Area%    |
|-------|-----------|-----------|------------|----------|
| 1     | 5.832     | 13824.941 | 209000.922 | 49.5558  |
| 2     | 6.457     | 11613.313 | 212747.969 | 50.4442  |
| Total |           | 25438.254 | 421748.891 | 100.0000 |

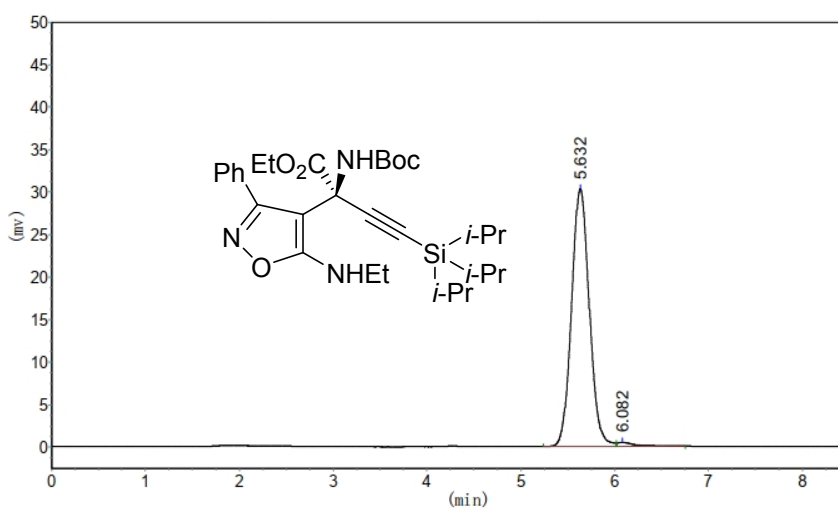

| Peak# | Ret. Time | Hight     | Area       | Area%    |
|-------|-----------|-----------|------------|----------|
| 1     | 5.632     | 30307.398 | 399915.000 | 98.3734  |
| 2     | 6.082     | 470.828   | 6612.474   | 1.6266   |
| Total |           | 30778.226 | 406527.474 | 100.0000 |

**Ethyl (S)-2-((*tert*-butoxycarbonyl)amino)-4-cyclopropyl-2-(5-(ethylamino)-3-phenylisoxazol-4-yl)but-3-ynoate (3an)**

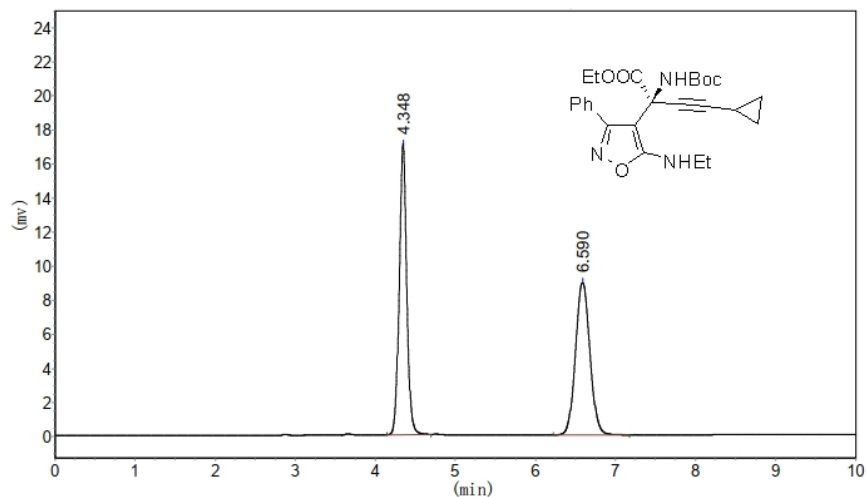

| Peak# | Ret. Time | Hight     | Area       | Area%    |
|-------|-----------|-----------|------------|----------|
| 1     | 4.348     | 17045.672 | 112062.148 | 50.0622  |
| 2     | 6.590     | 8924.982  | 111783.898 | 49.9378  |
| Total |           | 25970.654 | 223846.047 | 100.0000 |

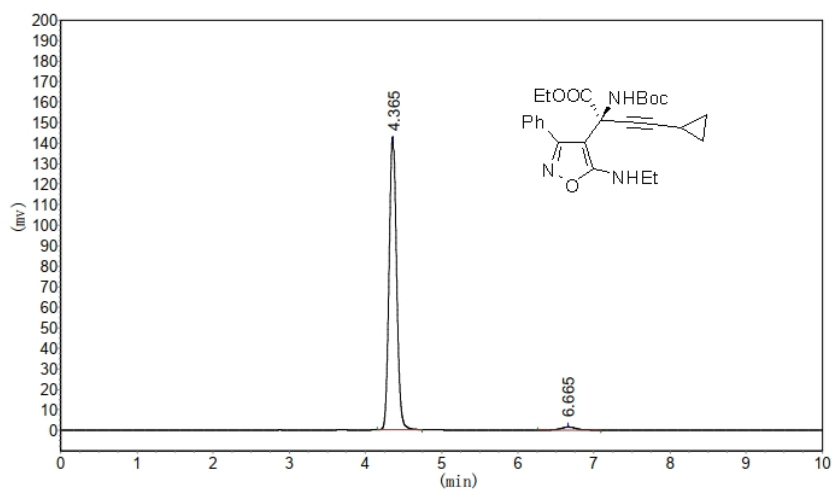

| Peak# | Ret. Time | Hight      | Area       | Area%    |
|-------|-----------|------------|------------|----------|
| 1     | 4.365     | 141911.578 | 965790.313 | 98.0019  |
| 2     | 6.665     | 1529.550   | 19690.801  | 1.9981   |
| Total |           | 143441.128 | 985481.113 | 100.0000 |



**Ethyl (S)-4-((tert-butoxycarbonyl)amino)-7-ethyl-5-iodo-3,6-diphenyl-4,7-dihydroisoxazolo[5,4-b]pyridine-4-carboxylate (4)**

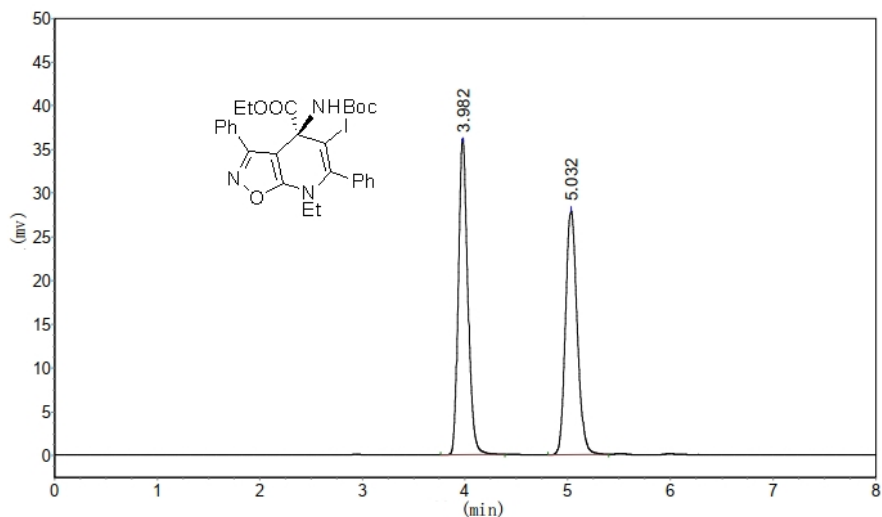

| Peak# | Ret. Time | Hight     | Area       | Area%    |
|-------|-----------|-----------|------------|----------|
| 1     | 3.982     | 36011.637 | 233801.656 | 51.3425  |
| 2     | 5.032     | 27812.297 | 221575.031 | 48.6575  |
| Total |           | 63823.934 | 455376.688 | 100.0000 |

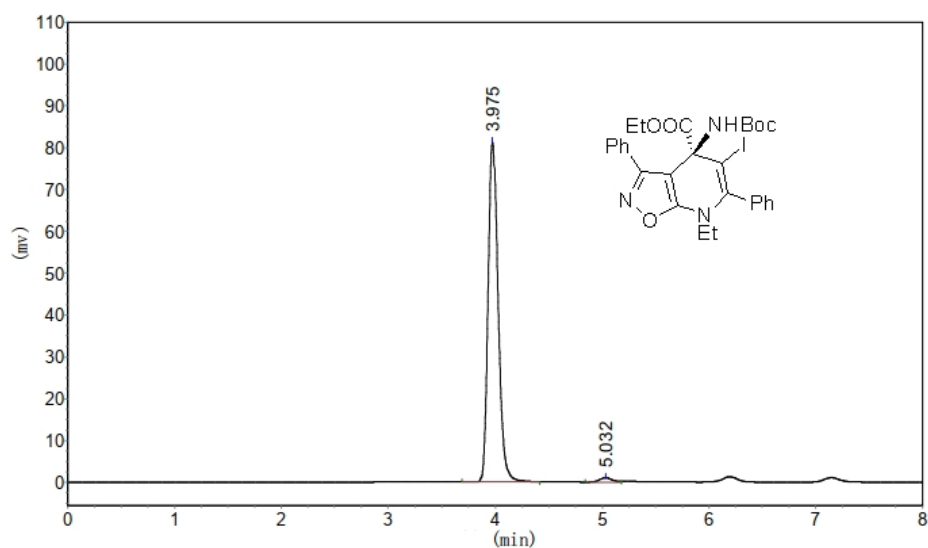

| Peak# | Ret. Time | Hight     | Area       | Area%    |
|-------|-----------|-----------|------------|----------|
| 1     | 3.975     | 81170.508 | 530482.313 | 98.3773  |
| 2     | 5.032     | 1082.000  | 8750.200   | 1.6227   |
| Total |           | 82252.508 | 539232.513 | 100.0000 |

**Ethyl (S,Z)-2-((tert-butoxycarbonyl)amino)-2-(5-(ethylamino)-3-phenylisoxazol-4-yl)-4-phenylbut-3-enoate (5)**

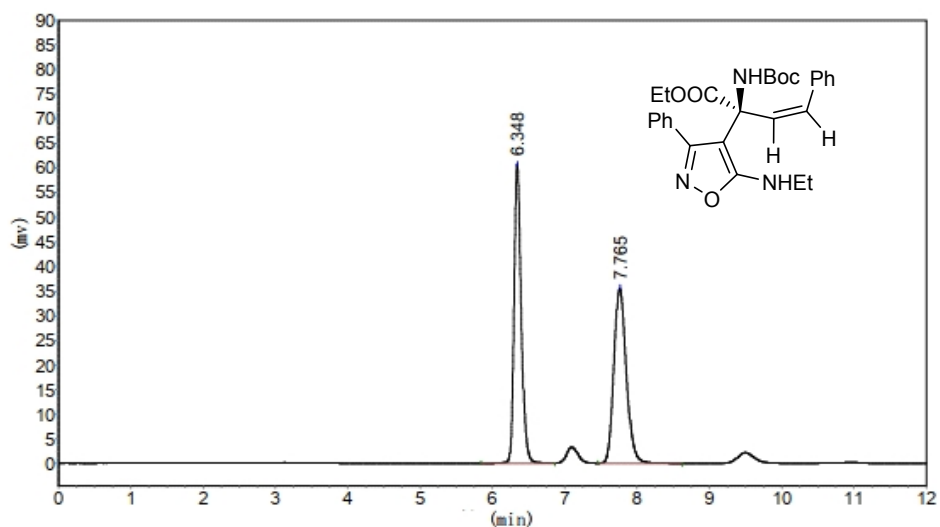

| Peak# | Ret.Time | Hight     | Area       | Area%    |
|-------|----------|-----------|------------|----------|
| 1     | 6.348    | 60597.199 | 426247.563 | 50.0539  |
| 2     | 7.765    | 35450.094 | 425328.844 | 49.9461  |
| Total |          | 96047.293 | 851576.406 | 100.0000 |

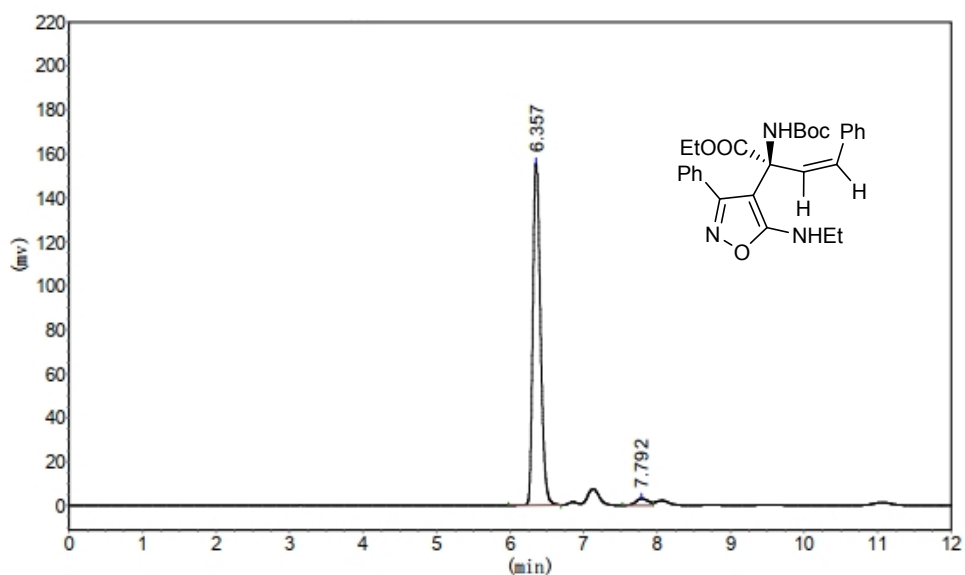

| Peak# | Ret.Time | Hight      | Area        | Area%    |
|-------|----------|------------|-------------|----------|
| 1     | 6.357    | 155609.328 | 1100915.875 | 96.6391  |
| 2     | 7.792    | 3243.000   | 38287.699   | 3.3609   |
| Total |          | 158852.328 | 1139203.574 | 100.0000 |

***tert*-butyl (S)-(2-(5-(ethylamino)-3-phenylisoxazol-4-yl)-1-hydroxy-4-phenylbut-3-yn-2-yl)carbamate (6)**

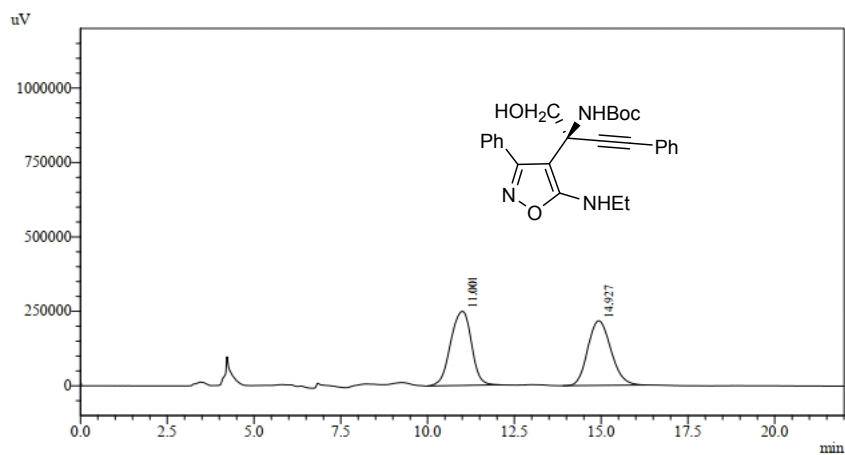

1 Det.A Ch1 / 254nm

Detector A Ch1 254nm

| Peak# | Ret. Time | Area     | Height | Area %  | Height % |
|-------|-----------|----------|--------|---------|----------|
| 1     | 11.001    | 10416697 | 249215 | 50.822  | 53.447   |
| 2     | 14.927    | 10079909 | 217070 | 49.178  | 46.553   |
| Total |           | 20496605 | 466285 | 100.000 | 100.000  |

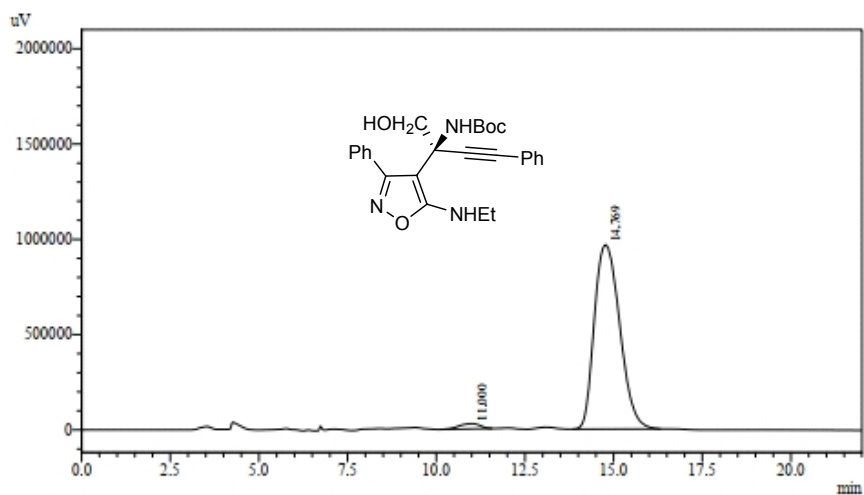

1 Det.A Ch1 / 254nm

Detector A Ch1 254nm

| Peak# | Ret. Time | Area     | Height | Area %  | Height % |
|-------|-----------|----------|--------|---------|----------|
| 1     | 11.000    | 1124810  | 27052  | 2.275   | 2.724    |
| 2     | 14.769    | 48309331 | 966176 | 97.725  | 97.276   |
| Total |           | 49434140 | 993228 | 100.000 | 100.000  |

**Ethyl 2-((*tert*-butoxycarbonyl)amino)-2-(5-(ethylamino)-3-phenylisoxazol-4-yl)-2-(1-((2*S*,3*S*,5*R*)-2-(hydroxymethyl)-5-(5-methyl-2,4-dioxo-3,4-dihydropyrimidin-1(2*H*)-yl)tetrahydrofuran-3-yl)-1*H*-1,2,3-triazol-4-yl)acetate (8)**

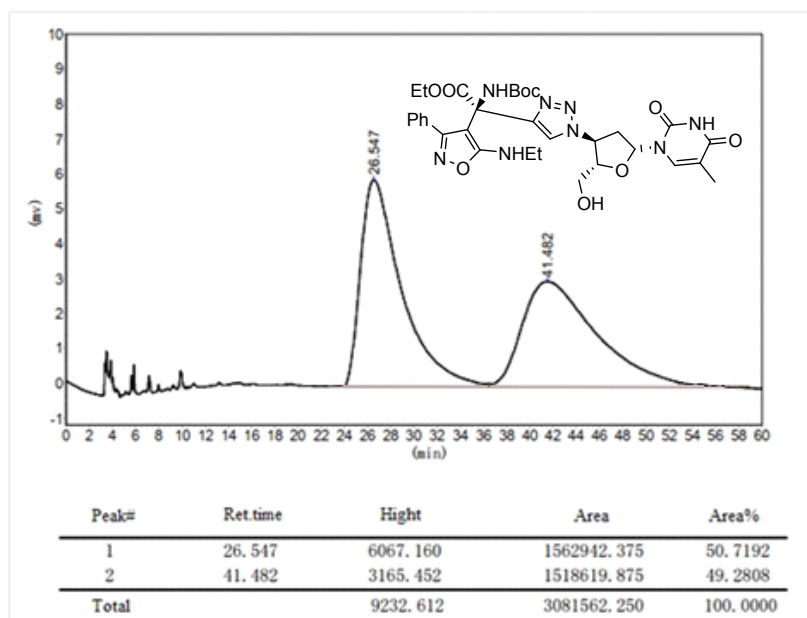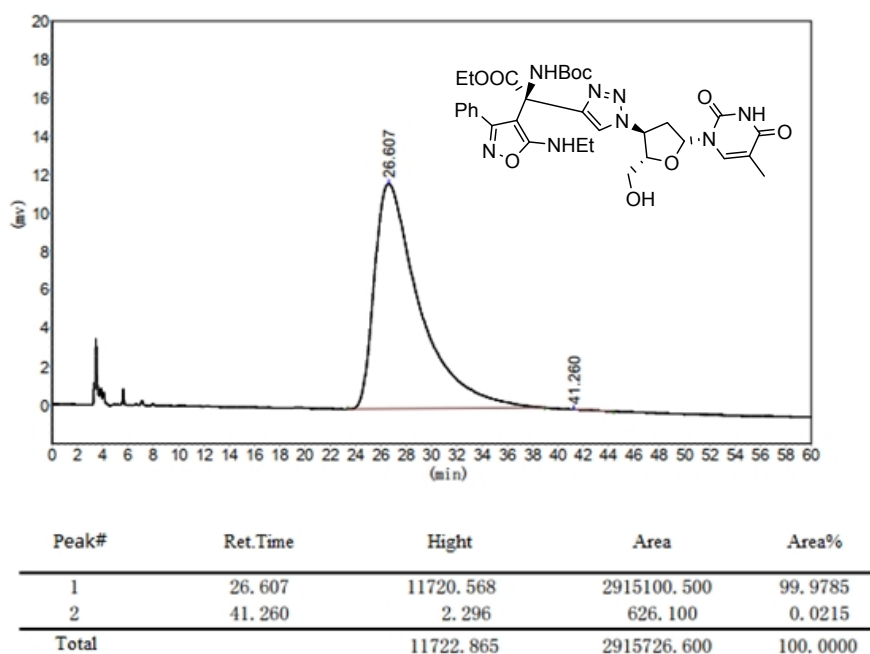

Supplement: d2ob01746f1.pdf [file d2ob01746f1.pdf]
